# Supplementary material for: Differences between gridded population data impact measures of geographic access to healthcare in sub-Saharan Africa
Source: Springer Nature journal article supplement (doi:10.1038/s43856-022-00179-4), 2022-09-16
Supplement: 43856_2022_179_MOESM4_ESM.pdf [file 43856_2022_179_MOESM4_ESM.pdf]

**Supplementary Table 1 – Country spatial projection system.**

| <b>Country code</b> | <b>Country name</b>              | <b>EPSG code</b> | <b>Projection</b>                     |
|---------------------|----------------------------------|------------------|---------------------------------------|
| AGO                 | Angola                           | 22033            | Camacupa 1948 / UTM zone 33S          |
| BDI                 | Burundi                          | 32736            | WGS 84 / UTM zone 36S                 |
| BEN                 | Benin                            | 32631            | WGS 84 / UTM zone 31N                 |
| BFA                 | Burkina Faso                     | 32630            | WGS 84 / UTM zone 30N                 |
| BWA                 | Botswana                         | 20934            | Arc 1950 / UTM zone 34S               |
| CAF                 | Central African Republic         | 32635            | WGS 84 / UTM zone 35N                 |
| CIV                 | Côte d'Ivoire                    | 2043             | Abidjan 1987 / UTM zone 29N           |
| CMR                 | Cameroon                         | 2215             | Manoca 1962 / UTM zone 32N            |
| COD                 | Democratic Republic of the Congo | 7992             | Malongo 1987 / UTM zone 33S           |
| COG                 | Republic of Congo                | 7992             | Malongo 1987 / UTM zone 33S           |
| COM                 | Comoros                          | 2999             | Grand Comoros / UTM zone 38S          |
| CPV                 | Cape Verde                       | 4826             | WGS 84 / Cape Verde National          |
| DJI                 | Djibouti                         | 32637            | WGS 84 / UTM zone 37N                 |
| DZA                 | Algeria                          | 30729            | Nord Sahara 1959 / UTM zone 29N       |
| EGY                 | Egypt                            | 32637            | WGS 84 / UTM zone 37N                 |
| ERI                 | Eritrea                          | 26237            | Massawa / UTM zone 37N                |
| ESH                 | Western Sahara                   | 26195            | Merchich / Sahara Sud                 |
| ETH                 | Ethiopia                         | 20138            | Adindan / UTM zone 38N                |
| GAB                 | Gabon                            | 26692            | M'poraloko / UTM zone 32S             |
| GHA                 | Ghana                            | 2136             | Accra / Ghana National Grid           |
| GIN                 | Guinea                           | 3462             | Dabola 1981 / UTM zone 29N            |
| GMB                 | Gambia                           | 6894             | Gambia                                |
| GNB                 | Guinea-Bissau                    | 2095             | Bissau / UTM zone 28N                 |
| GNQ                 | Equatorial Guinea                | 6883             | Bioko                                 |
| KEN                 | Kenya                            | 21097            | Arc 1960 / UTM zone 37N               |
| LBR                 | Liberia                          | 4251             | Liberia 1964                          |
| LBY                 | Libya                            | 3177             | LGD2006 / Libya TM                    |
| LSO                 | Lesotho                          | 4222             | Cape                                  |
| MAR                 | Morocco                          | 4261             | Merchich                              |
| MDG                 | Madagascar                       | 29739            | Tananarive / UTM zone 39S             |
| MLI                 | Mali                             | 32630            | WGS 84 / UTM zone 30N                 |
| MOZ                 | Mozambique                       | 5629             | Moznet / UTM zone 38S                 |
| MRT                 | Mauritania                       | 3345             | Mauritania 1999 / UTM zone 30N        |
| MUS                 | Mauritius                        | 3337             | Le Pouce 1934 / Mauritius Grid        |
| MWI                 | Malawi                           | 20936            | Arc 1950 / UTM zone 36S               |
| NAM                 | Namibia                          | 29333            | Schwarzeck / UTM zone 33S             |
| NER                 | Niger                            | 2931             | Beduaram / TM 13 NE                   |
| NGA                 | Nigeria                          | 4263             | Minna                                 |
| RWA                 | Rwanda                           | 32736            | WGS 84 / UTM zone 36S                 |
| SDN                 | Sudan                            | 20135            | Adindan / UTM zone 35N                |
| SEN                 | Senegal                          | 31028            | Yoff / UTM zone 28N                   |
| SLE                 | Sierra Leone                     | 2162             | Sierra Leone 1968 / UTM zone 29N      |
| SOM                 | Somalia                          | 20539            | Afgooye / UTM zone 39N                |
| SSD                 | South Sudan                      | 20135            | Adindan / UTM zone 35N                |
| STP                 | São Tomé and Príncipe            | 4823             | Sao Tome                              |
| SWZ                 | Swaziland                        | 22291            | Cape / Lo31                           |
| SYC                 | Seychelles                       | 6915             | South East Island 1943 / UTM zone 40N |
| TCD                 | Chad                             | 32434            | WGS 72BE / UTM zone 34N               |
| TGO                 | Togo                             | 25231            | Lome / UTM zone 31N                   |
| TUN                 | Tunisia                          | 22332            | Carthage / UTM zone 32N               |
| TZA                 | Tanzania                         | 21037            | Arc 1960 / UTM zone 37S               |
| UGA                 | Uganda                           | 21095            | Arc 1960 / UTM zone 35N               |
| ZAF                 | South Africa                     | 22293            | Cape / Lo33                           |
| ZMB                 | Zambia                           | 20934            | Arc 1950 / UTM zone 34S               |
| ZWE                 | Zimbabwe                         | 20936            | Arc 1950 / UTM zone 36S               |

**Supplementary Table 2 – Description of gridded population datasets as adapted from<sup>19, 20, 22</sup>.**

| Gridded population dataset | Name dataset                            | Producer                                         | Resolution                        | Year | Method                                                                                                                                                                                  | Covariates                                                                                                                                                                           | Distribution                                                                                                                                        | Citation |
|----------------------------|-----------------------------------------|--------------------------------------------------|-----------------------------------|------|-----------------------------------------------------------------------------------------------------------------------------------------------------------------------------------------|--------------------------------------------------------------------------------------------------------------------------------------------------------------------------------------|-----------------------------------------------------------------------------------------------------------------------------------------------------|----------|
| <b>GHS-POP</b>             | GHS POP MT GLOBE R2019A                 | European Commission, Joint Research Centre (JRC) | 250m (World Mollweide)            | 2015 | Binary dasymetric. Population is proportionally redistributed to built-up areas from the Global Human Settlement Layer Built-Up Extent (GHS-BUILT), extracted from 30m Landsat imagery. | Built-up areas from the GHS-BUILT                                                                                                                                                    | Open access (Creative commons Attribution 4.0 International License)                                                                                | 13       |
| <b>GPWv4</b>               | UN WPP-Adjusted Population Count, v4.11 | CIESN, Columbia University                       | 30 arc-second (approximately 1km) | 2020 | Aerial weighting. Equal redistribution of census within administrative boundaries                                                                                                       | Protected areas and water bodies                                                                                                                                                     | Open access (Creative commons Attribution 4.0 International License)                                                                                | 14       |
| <b>LandScan</b>            | Landscan Global Population Database     | Oak Ridge National Laboratory                    | 30 arc-second (approximately 1km) | 2018 | Multivariable dasymetric mapping with 4 covariates to estimate the 24h average ambient population                                                                                       | Roads, land cover, built structures, cities or urban areas infrastructure, environmental data, protected areas and water bodies.                                                     | Open access for academic research, humanitarian purposes, and for US government agencies or staff. Commercial license available for other entities. | 17       |
| <b>HRSL</b>                | High Resolution Settlement Layer        | Facebook Connectivity Lab and CIESN              | 1 arc-second (approximately 30m)  | 2015 | Binary dasymetric. Population is redistributed to cells with built structures as extracted from 0.5m Maxar imagery (0.5m resolution).                                                   | Built structures                                                                                                                                                                     | Open access                                                                                                                                         | 16       |
| <b>WorldPop</b>            | Constrained (top-down)                  | WorldPop, University of Southampton              | 3 arc-second (approximately 100m) | 2020 | Random Forest model with 24 covariates and binary dasymetric reallocation of population constrained to cells with settlements.                                                          | Roads, land cover, built structures, cities or urban areas, nighttime lights, infrastructure, environmental data, protected areas and water bodies. Constrained to built structures. | Open access                                                                                                                                         | 12       |
|                            | Unconstrained (top-down)                | WorldPop, University of Southampton              | 3 arc-second (approximately 100m) | 2020 | Random Forest model with 24 covariates and dasymetric redistribution.                                                                                                                   | Roads, land cover, built structures, cities or urban areas, nighttime lights, infrastructure, environmental data, protected areas and water bodies.                                  | Open access                                                                                                                                         | 12       |

**Supplementary Table 3 – Relative accessibility coverage per country (1-hour travel time).**

| <b>Country</b>                   | <b>HRSL</b> | <b>GHS-POP</b> | <b>GPWv4</b> | <b>LandScan</b> | <b>WorldPop<br/>constrained</b> | <b>WorldPop<br/>unconstrained</b> |
|----------------------------------|-------------|----------------|--------------|-----------------|---------------------------------|-----------------------------------|
| Angola                           | 84          | 91.1           | 62.7         | 74.6            | 85.2                            | 77.1                              |
| Benin                            | 96.3        | 97.9           | 82.2         | 95.9            | 93.7                            | 88.8                              |
| Botswana                         | 97.5        | 96.9           | 57.6         | 93.8            | 95.8                            | 81.2                              |
| Burkina Faso                     | 91.1        | 93.2           | 79.5         | 88.7            | 88.2                            | 84.6                              |
| Burundi                          | 99.9        | 98.8           | 98.2         | 99.2            | 99.9                            | 98.6                              |
| Cameroon                         | 96.9        | 97.7           | 69.8         | 94.1            | 95.7                            | 84.6                              |
| Cape Verde                       |             | 99.6           | 98.5         | 99.6            | 99.1                            | 98.9                              |
| Central African Republic         | 93.5        | 94.3           | 49.4         | 85.9            | 92.1                            | 75.4                              |
| Chad                             | 73.8        | 87.7           | 44.7         | 74.1            | 66.9                            | 53.4                              |
| Comoros                          | 99.9        | 99.9           | 80.2         | 100             | 99.5                            | 89.1                              |
| Côte d'Ivoire                    | 96          | 98             | 82.1         | 95.7            | 93.9                            | 89.9                              |
| Democratic Republic of the Congo | 93.5        | 95.4           | 57           | 89.1            | 90.2                            | 79.3                              |
| Djibouti                         | 96.8        | 90.8           | 64.8         | 94.1            | 89.1                            | 79.4                              |
| Equatorial Guinea                | 96.1        | 97.5           | 39.6         | 82.8            | 94.3                            | 49.5                              |
| Eritrea                          | 81.9        | 75.5           | 40.9         | 79.7            | 68.5                            | 62.5                              |
| Ethiopia                         |             | 94.2           | 70.4         | 89.9            | 83.6                            | 80.7                              |
| Gabon                            | 94.4        | 94.6           | 46.2         | 90.5            | 93.7                            | 54.6                              |
| Gambia                           | 72          | 80.9           | 54.9         | 72.2            | 72.1                            | 66.3                              |
| Ghana                            | 98.3        | 98.8           | 88.2         | 97.5            | 96.3                            | 93.5                              |
| Guinea                           | 94.2        | 95.6           | 75.8         | 90.7            | 92.6                            | 84.5                              |
| Guinea-Bissau                    | 62.1        | 66.5           | 47.7         | 59.2            | 61.4                            | 52.4                              |
| Kenya                            | 97.3        | 93.1           | 90.3         | 94.7            | 95.1                            | 92.1                              |
| Lesotho                          | 99.2        | 97             | 90.9         | 96.9            | 98.4                            | 92.8                              |
| Liberia                          | 93.9        | 94             | 69.3         | 89.5            | 89.4                            | 77.2                              |
| Madagascar                       | 75.1        | 69.9           | 58.7         | 76.6            | 68.7                            | 65                                |
| Malawi                           | 99.5        | 97.5           | 97.6         | 97.5            | 99.1                            | 97.4                              |
| Mali                             | 92.5        | 89.7           | 83.1         | 89.3            | 91.9                            | 87.2                              |
| Mauritania                       | 79.9        | 77.3           | 61           | 72              | 74.3                            | 71.2                              |
| Mauritius                        | 98.1        | 97.9           | 96.9         | 98.1            | 98                              | 97                                |
| Mozambique                       | 85.9        | 85.8           | 63.4         | 79.8            | 83.6                            | 76.1                              |
| Namibia                          | 87.3        | 84.2           | 82.6         | 83              | 87                              | 86.7                              |
| Niger                            | 85.6        | 87.5           | 68.5         | 82.3            | 82.8                            | 78.8                              |
| Nigeria                          | 97.7        | 96.5           | 89.4         | 96.9            | 97                              | 93.5                              |
| Republic of Congo                | 90.5        | 93.1           | 34.6         | 89.9            | 79.3                            | 41.6                              |
| Rwanda                           | 99.5        | 98.3           | 96.6         | 97.3            | 99.3                            | 97.3                              |
| Sao Tome and Principe            | 99.3        | 96.9           | 90.1         | 99.7            | 99                              | 91.1                              |
| Senegal                          | 95.5        | 97.4           | 82.9         | 94.4            | 95.2                            | 89.5                              |
| Seychelles                       | 98.5        | 98.9           | 94.9         | 98.9            | 97.7                            | 95.9                              |
| Sierra Leone                     | 97.9        | 95.7           | 89           | 95.4            | 96.5                            | 92.9                              |
| Somalia                          | 100         | 86             | 62.6         | 81.8            | 84.3                            | 70.5                              |
| South Africa                     | 99.6        | 99.1           | 98.7         | 98              | 99.5                            | 99.2                              |
| South Sudan                      |             | 80.9           | 35.5         | 80.2            | 82                              | 43.7                              |
| Sudan                            |             | 54.6           | 18.8         | 46.2            | 40.7                            | 33.2                              |
| Swaziland                        | 99.6        | 90.9           | 96.9         | 98.6            | 99.5                            | 97.2                              |
| Tanzania                         | 96.1        | 93.3           | 86.7         | 94.2            | 95.1                            | 91.7                              |
| Togo                             | 97.9        | 97.5           | 89.6         | 96.7            | 97                              | 93.9                              |
| Uganda                           | 99.1        | 97.4           | 93.7         | 97.5            | 98.6                            | 96.1                              |
| Zambia                           | 89.3        | 89.7           | 64.5         | 86.5            | 86.7                            | 76.4                              |
| Zimbabwe                         | 97.9        | 88.1           | 89.6         | 96.7            | 97.4                            | 93.6                              |

**Supplementary Table 4** – Comparison of accessibility coverage estimates for seven provinces in the Democratic Republic of the Congo for which bottom-up estimates were recently released. For each province we indicated the absolute number of people covered in 1-hour travel time, the relative number of people covered, and the percentage of the population falling on barriers (i.e. rivers and lakes).

|                        | Haut-Katanga |           |           | Haut-Lomami |           |           | Ituri       |           |           | Kasaï       |           |           | Kasaï-Oriental |           |           | Lomami      |           |           | Sud-Kivu    |           |           |
|------------------------|--------------|-----------|-----------|-------------|-----------|-----------|-------------|-----------|-----------|-------------|-----------|-----------|----------------|-----------|-----------|-------------|-----------|-----------|-------------|-----------|-----------|
|                        | nr. covered  | % covered | % barrier | nr. covered | % covered | % barrier | nr. covered | % covered | % barrier | nr. covered | % covered | % barrier | nr. covered    | % covered | % barrier | nr. covered | % covered | % barrier | nr. covered | % covered | % barrier |
| HRSL                   | 5,747,046    | 95.5      | 0.2       | 4,023,749   | 90.1      | 0.2       | 4,380,453   | 98.9      | 0.4       | 3,688,383   | 92.7      | 0.3       | 3,909,065      | 98.9      | 0.1       | 2,767,965   | 95.4      | 0         | 4,362,380   | 95.8      | 1.5       |
| GHS-POP                | 5,789,005    | 98.3      | 0.8       | 4,023,916   | 92.1      | 0.3       | 4,320,053   | 99.4      | 0.5       | 3,684,768   | 93.7      | 0.6       | 3,858,273      | 99.4      | 0.4       | 2,697,294   | 94.8      | 0.2       | 4,221,054   | 94.5      | 4.8       |
| GPWv4                  | 5,263,534    | 63.8      | 1         | 2,560,661   | 41.6      | 0.9       | 3,782,259   | 77.6      | 1.2       | 1,995,482   | 40.4      | 0.7       | 4,084,164      | 92.7      | 3.5       | 2,302,284   | 71.2      | 0.9       | 3,227,441   | 65.6      | 3.3       |
| GRID3                  | 4,580,262    | 93.3      | 0.2       | 2,275,209   | 84.3      | 0.6       | 5,058,822   | 97.6      | 0.5       | 2,650,634   | 89.5      | 0.5       | 2,176,677      | 96.6      | 0.2       | 2,551,022   | 93.5      | 0         | 4,575,325   | 96.3      | 1.3       |
| LandScan               | 3,076,949    | 93.7      | 0.7       | 1,678,176   | 80        | 0.8       | 5,132,628   | 97.8      | 1.1       | 3,030,880   | 85.7      | 0.6       | 3,394,953      | 97.5      | 1.1       | 2,755,803   | 93.6      | 0.2       | 5,807,295   | 87.5      | 5.7       |
| WorldPop constrained   | 7,545,390    | 89.7      | 0.4       | 5,253,516   | 84        | 0.6       | 4,727,189   | 96.8      | 0.5       | 4,368,401   | 88.4      | 0.4       | 4,371,462      | 98.3      | 0.2       | 3,019,200   | 92.5      | 0.1       | 4,662,320   | 94.8      | 1.3       |
| WorldPop unconstrained | 7,167,589    | 85        | 1.1       | 4,145,649   | 66.3      | 0.8       | 4,542,688   | 93.1      | 1         | 3,688,820   | 74.7      | 0.5       | 4,389,662      | 97.2      | 1.4       | 2,856,164   | 87.4      | 0.6       | 4,238,609   | 86.2      | 2.2       |

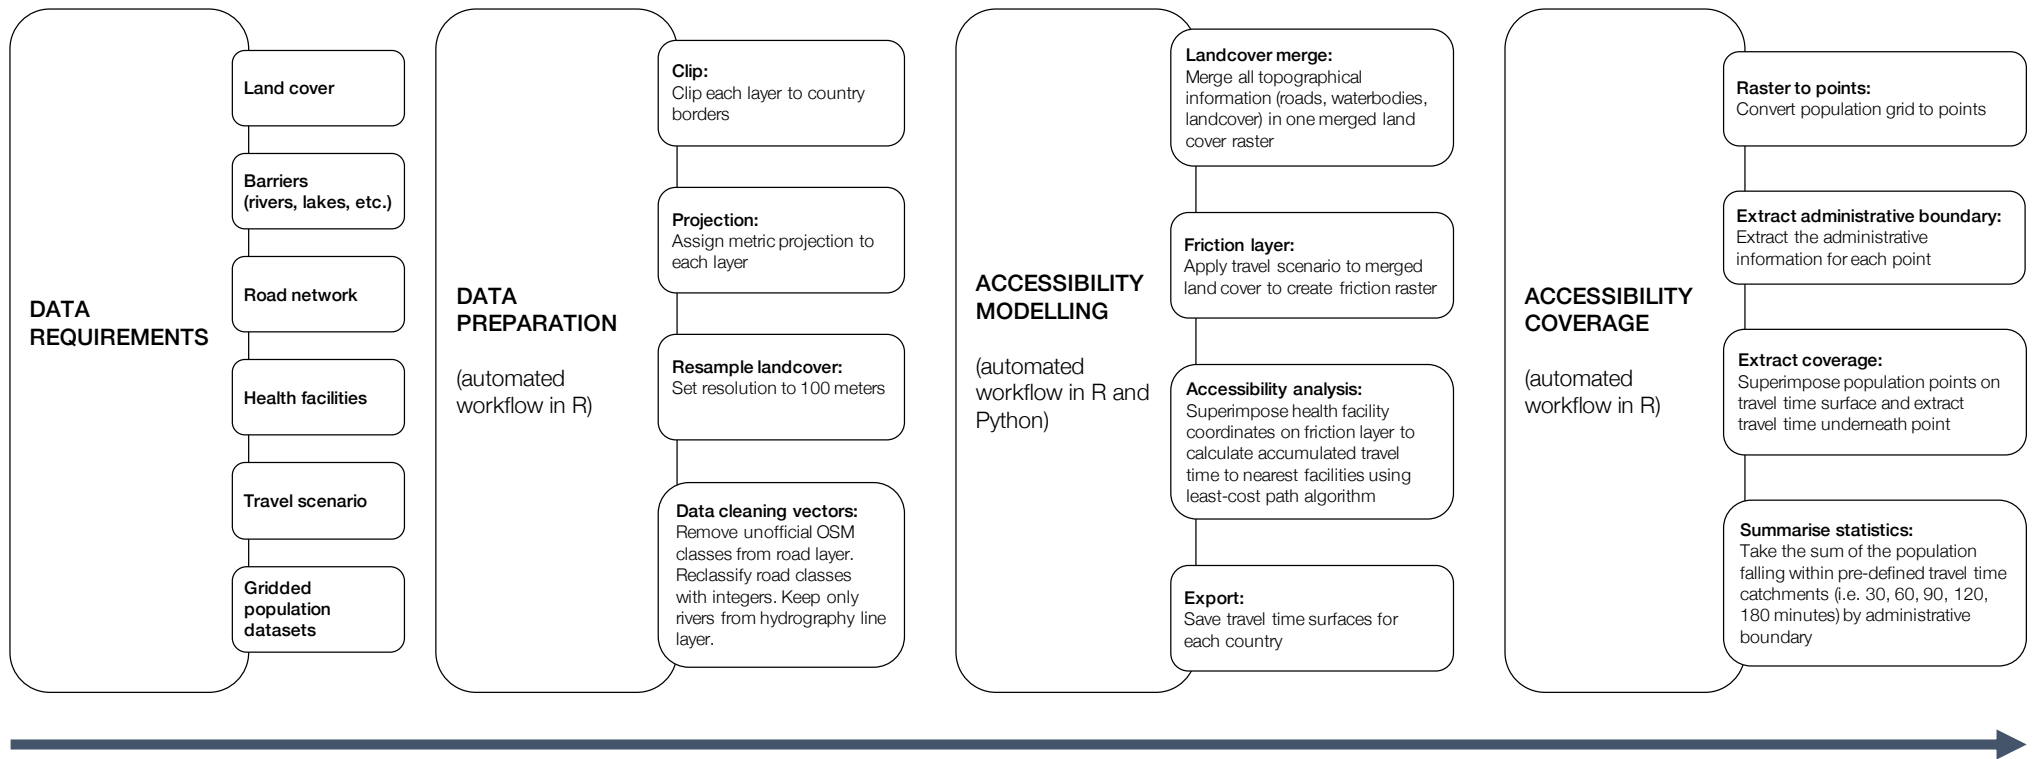

Supplementary Figure 1 – Visual overview of methodology with successive steps from left to right.

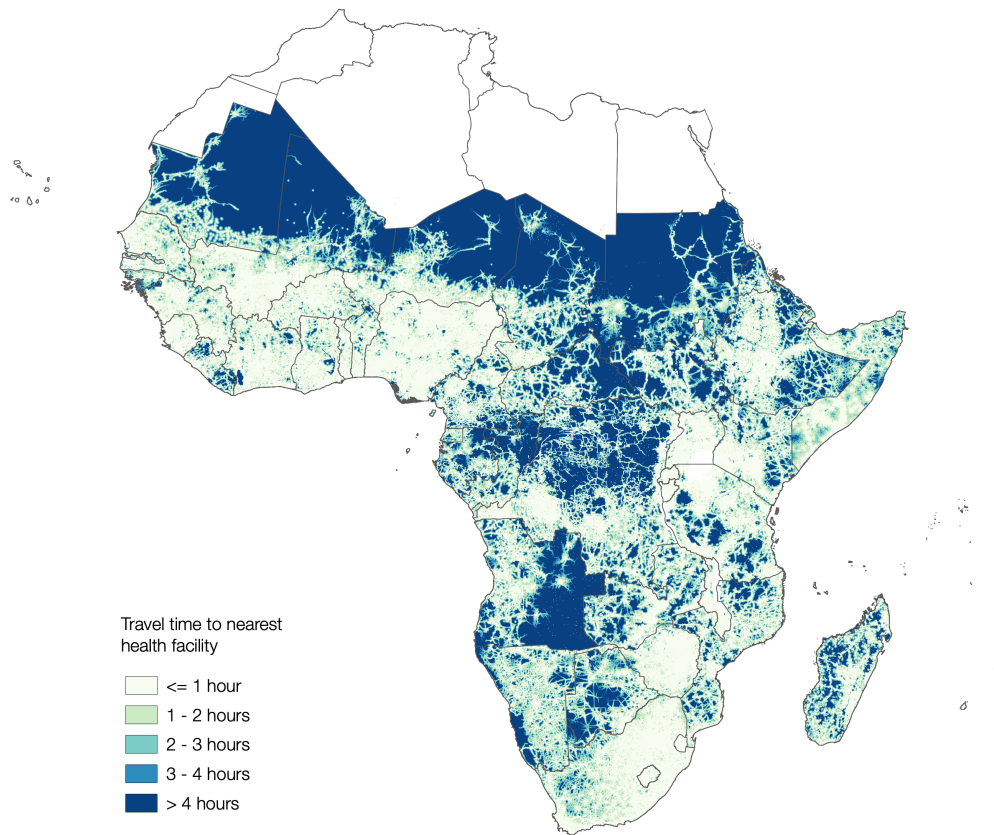

**Supplementary Figure 2** – Travel time to nearest health facilities in sub-Saharan Africa (considering walking and motorized transport) for the first time at a resolution of 100 meters for sub-Saharan Africa. We would like to stipulate that widescale assumptions on travel speeds and modes have been made to construct the national maps of travel time to healthcare. These assumptions may not correspond to local realities of health seeking behavior. We therefore recognize that these maps should not be used for informed health system planning.

# Angola

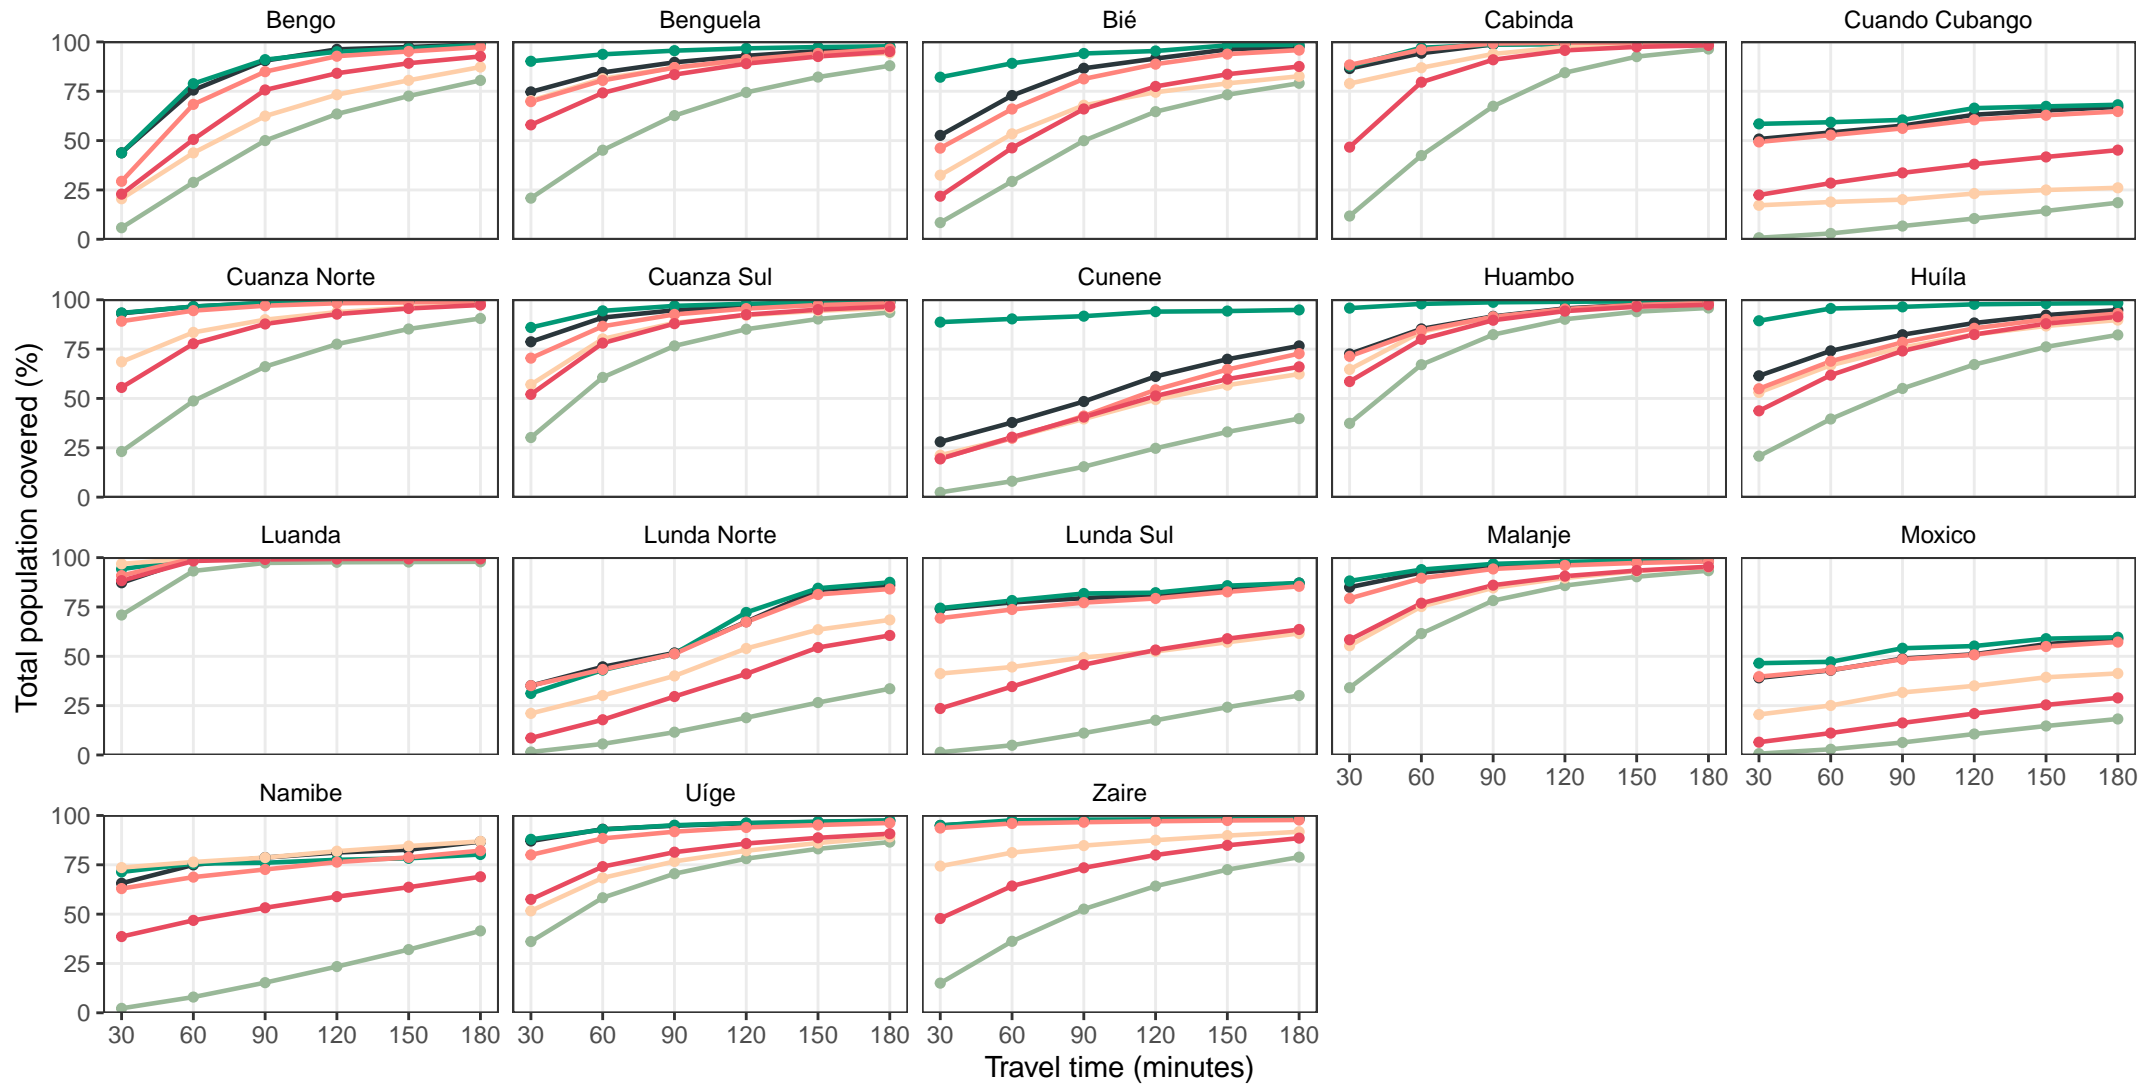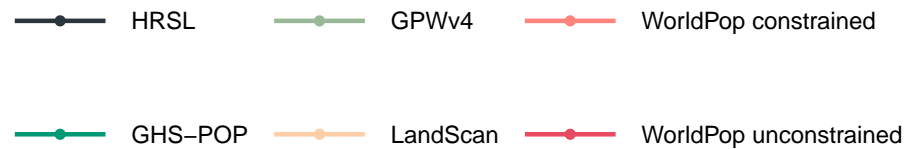

Supplementary Figure 3 – Accessibility coverage at 30, 60, 90, 120, and 150 minutes travel time at administrative level 1 for Angola.

# Burundi

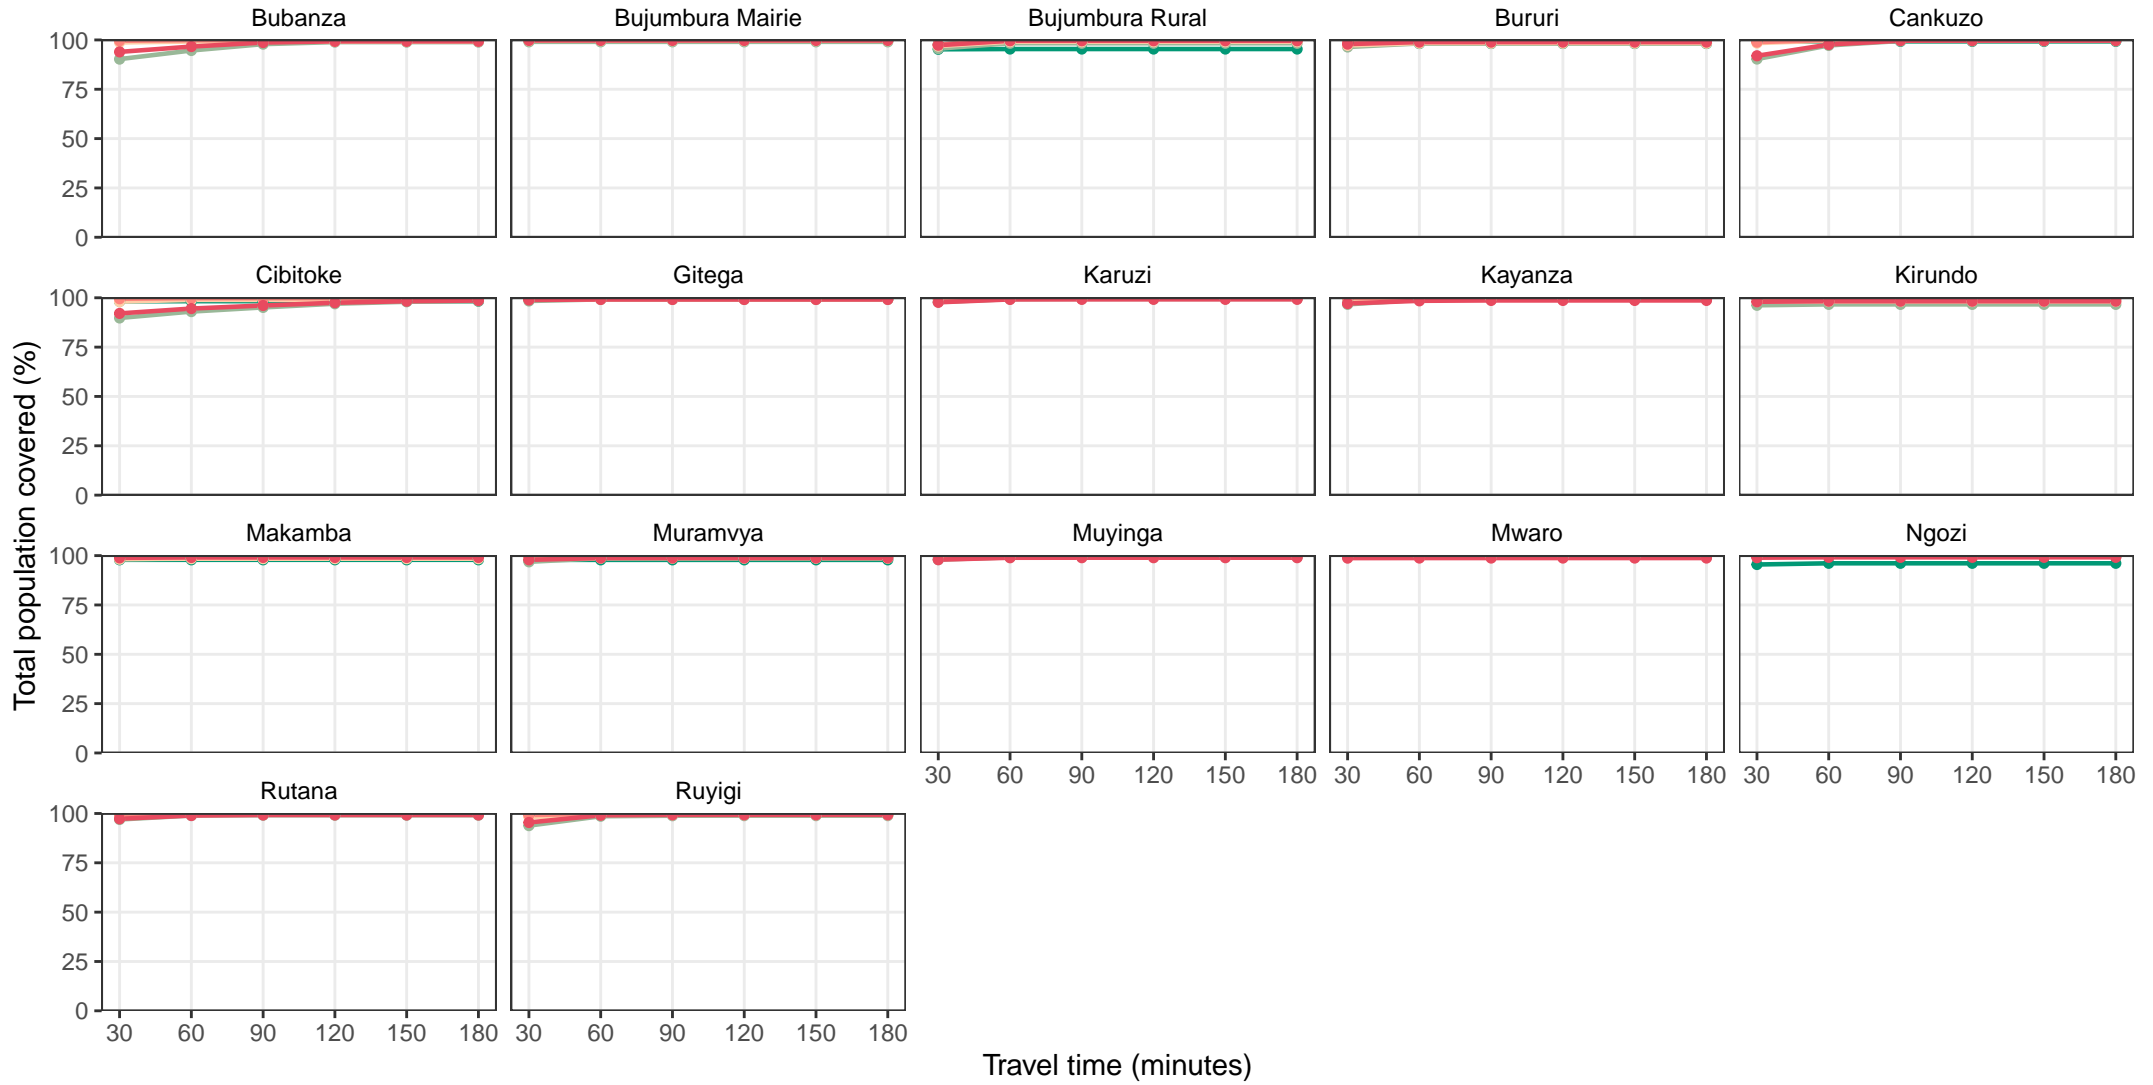

Supplementary Figure 4 – Accessibility coverage at 30, 60, 90, 120, and 150 minutes travel time at administrative level 1 for Burundi.



# Benin

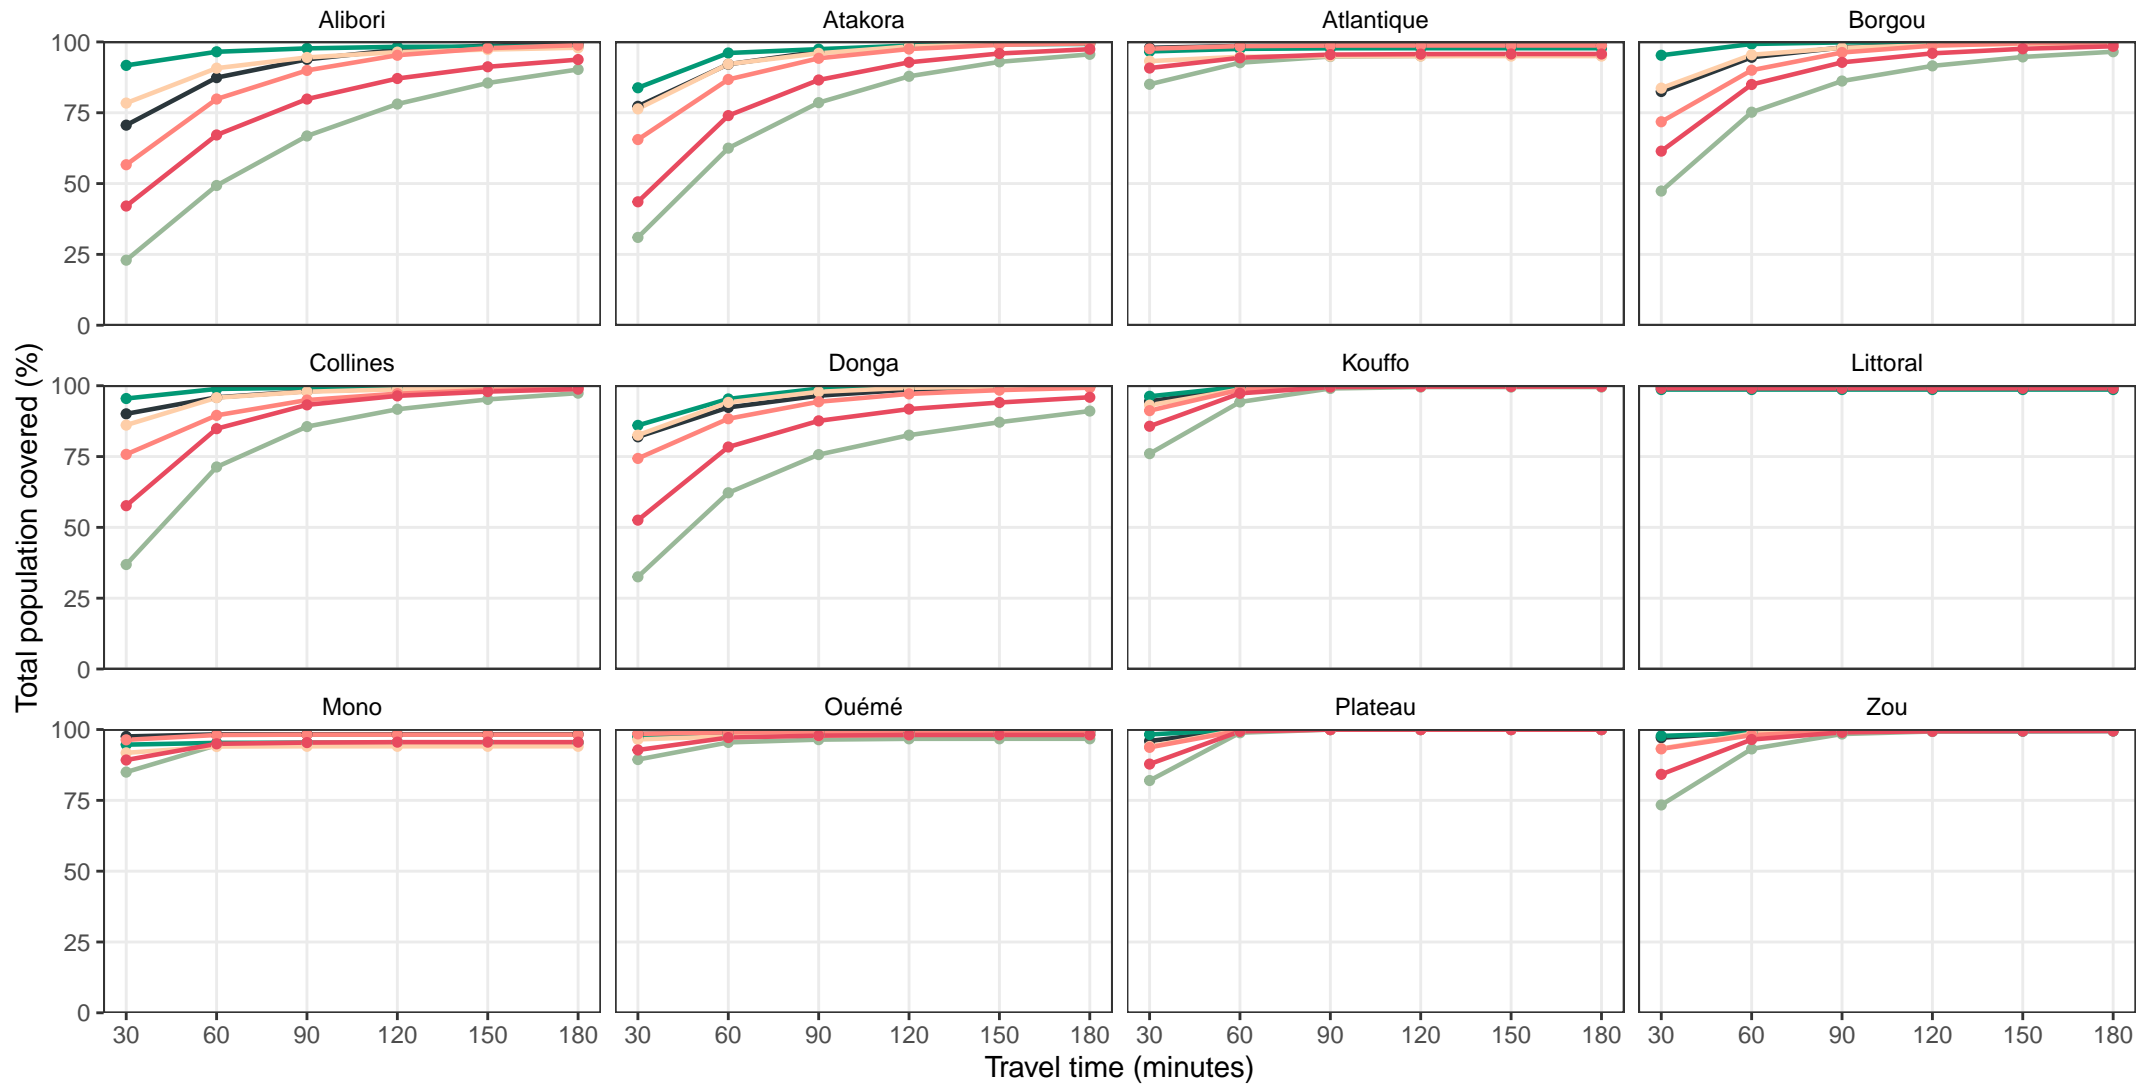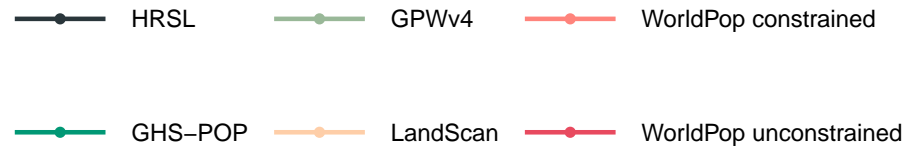

Supplementary Figure 5 – Accessibility coverage at 30, 60, 90, 120, and 150 minutes travel time at administrative level 1 for Benin.

# Burkina Faso

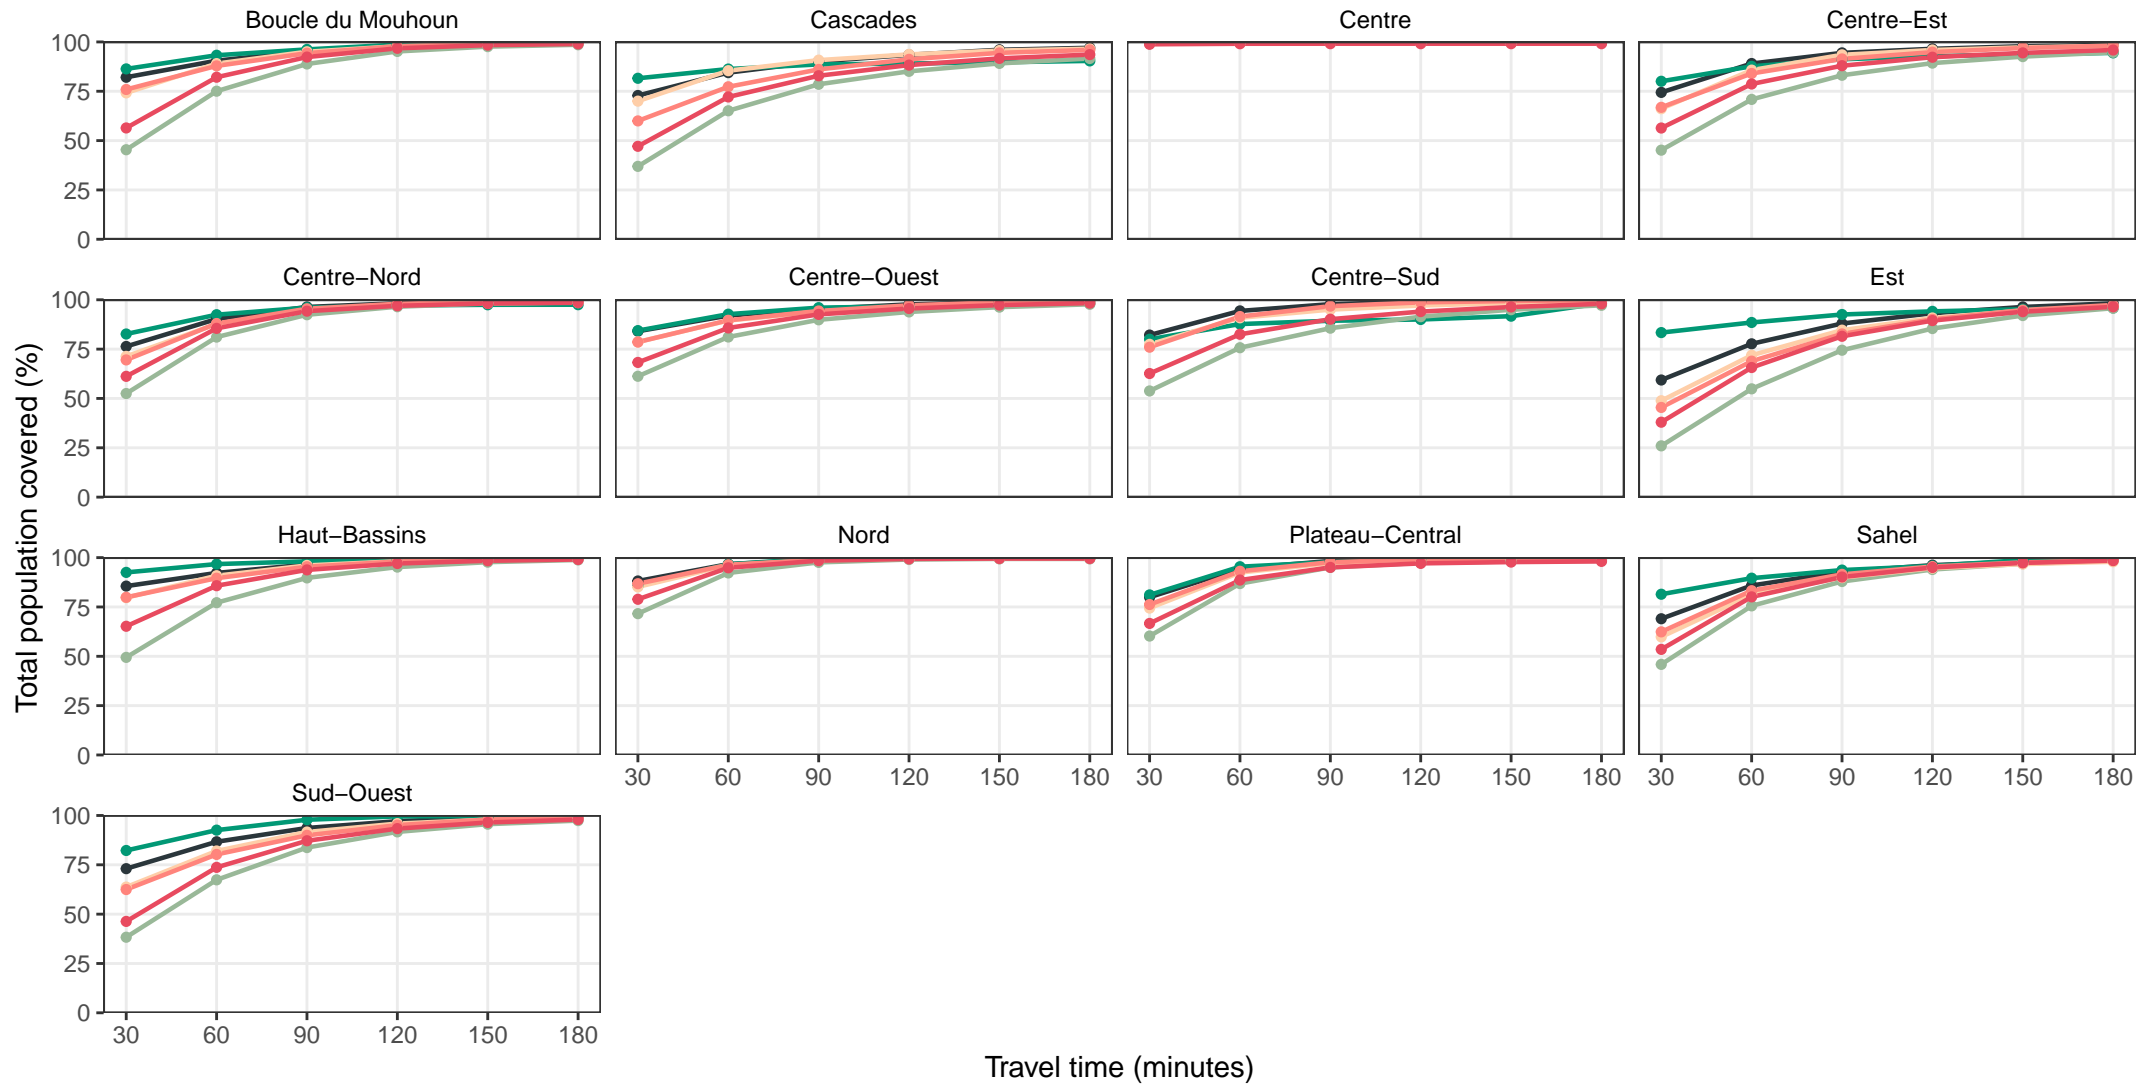

Supplementary Figure 6 – Accessibility coverage at 30, 60, 90, 120, and 150 minutes travel time at administrative level 1 for Burkina Faso.

# Botswana

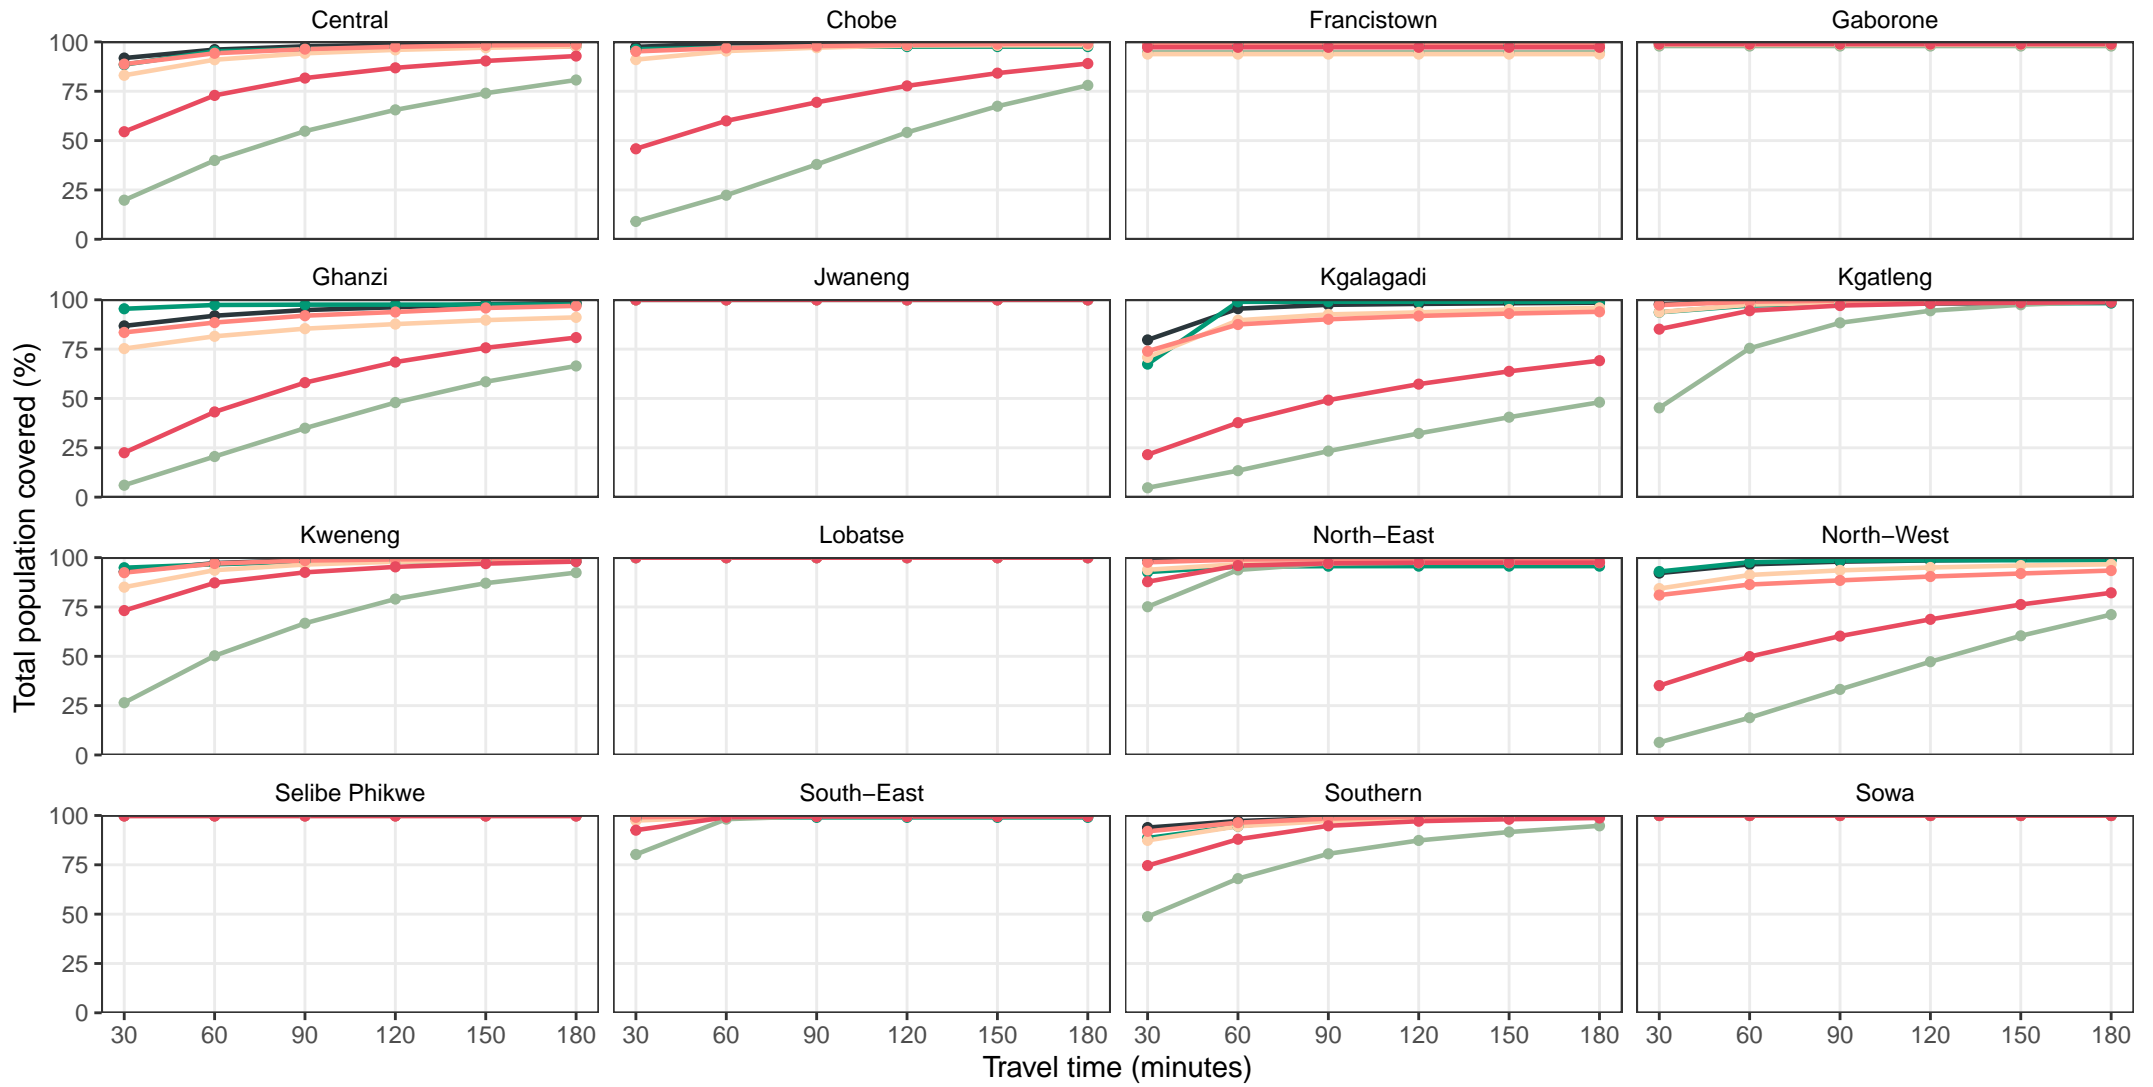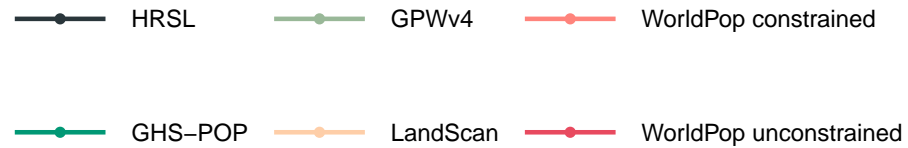

Supplementary Figure 7 – Accessibility coverage at 30, 60, 90, 120, and 150 minutes travel time at administrative level 1 for Botswana.

# Central African Republic

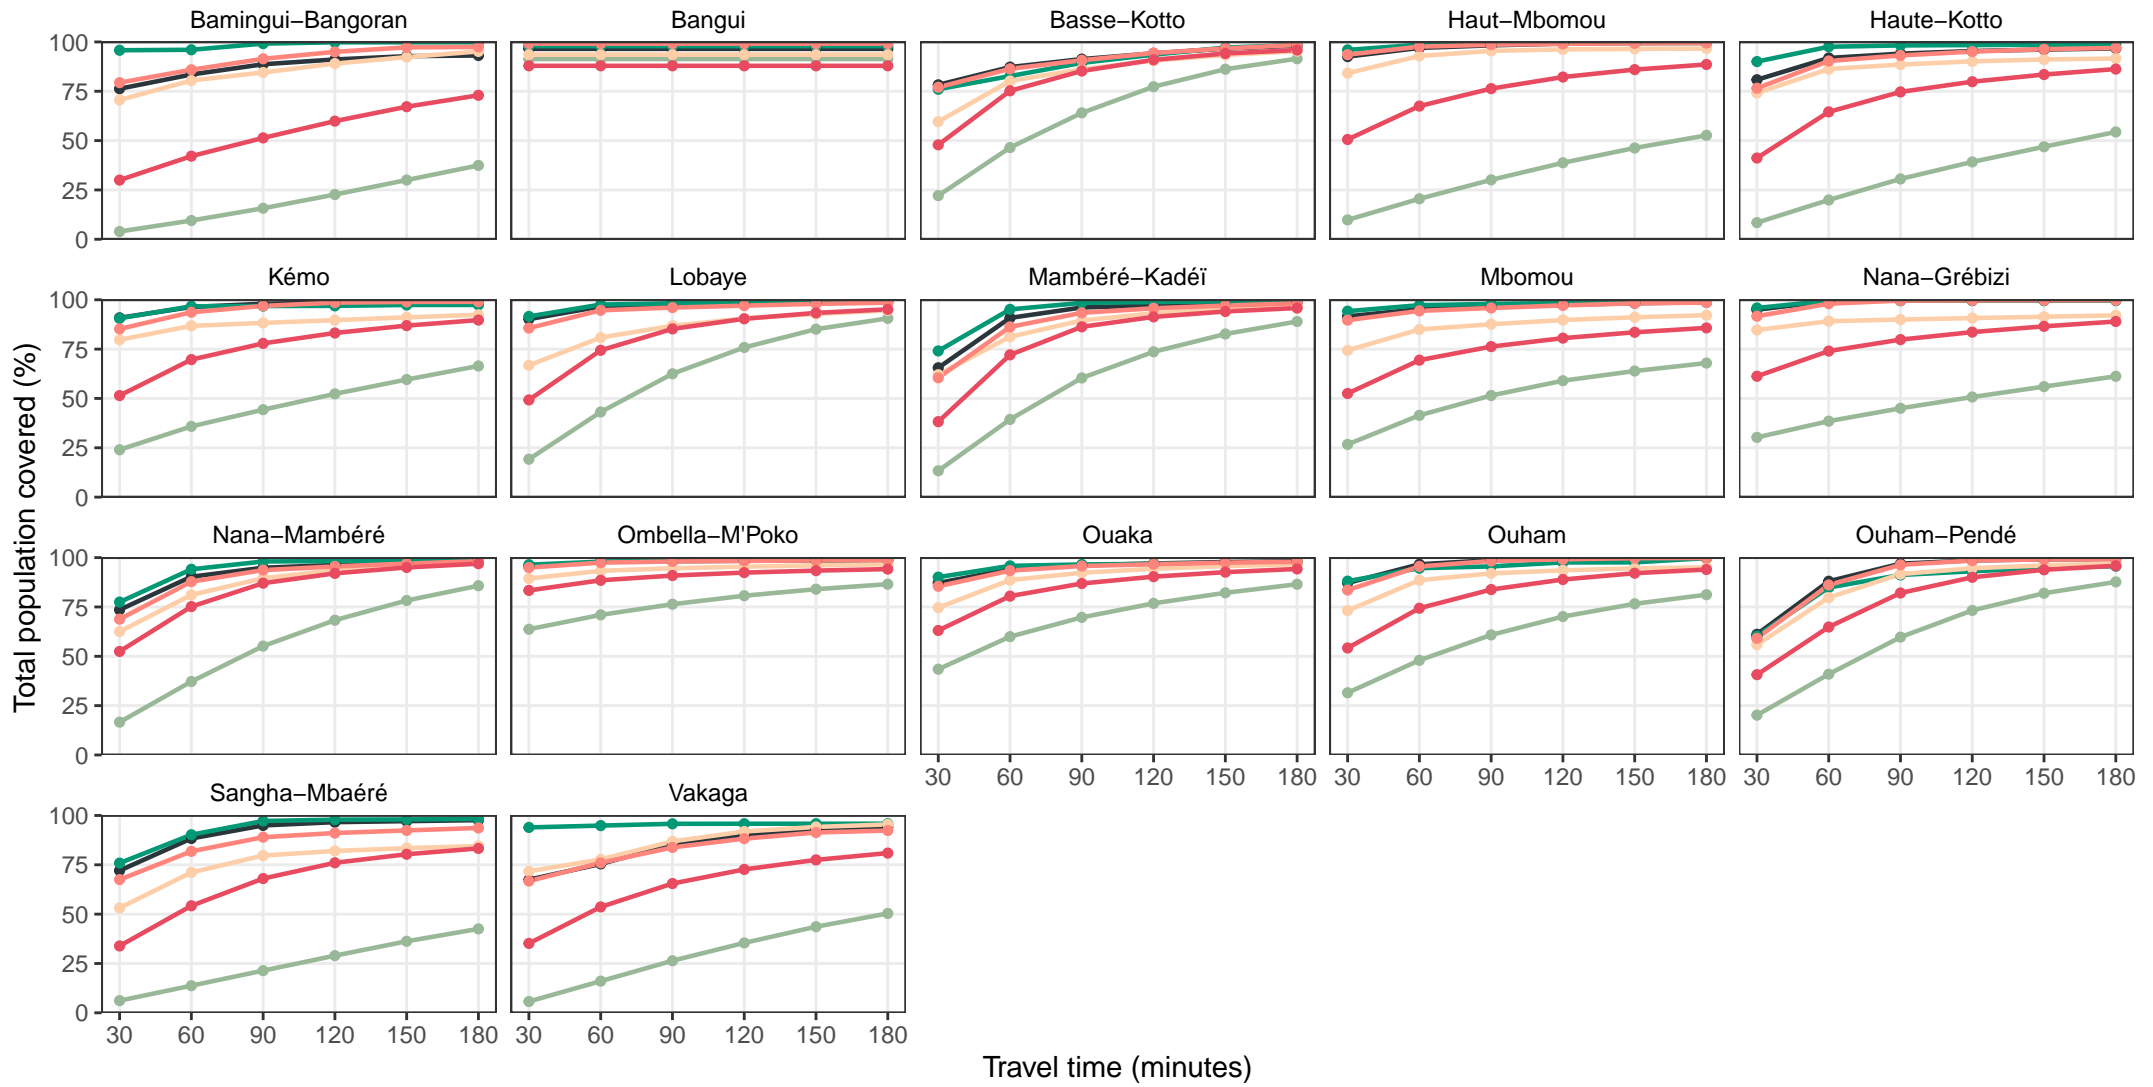

Supplementary Figure 8 – Accessibility coverage at 30, 60, 90, 120, and 150 minutes travel time at administrative level 1 for Central African Republic.

# Côte d'Ivoire

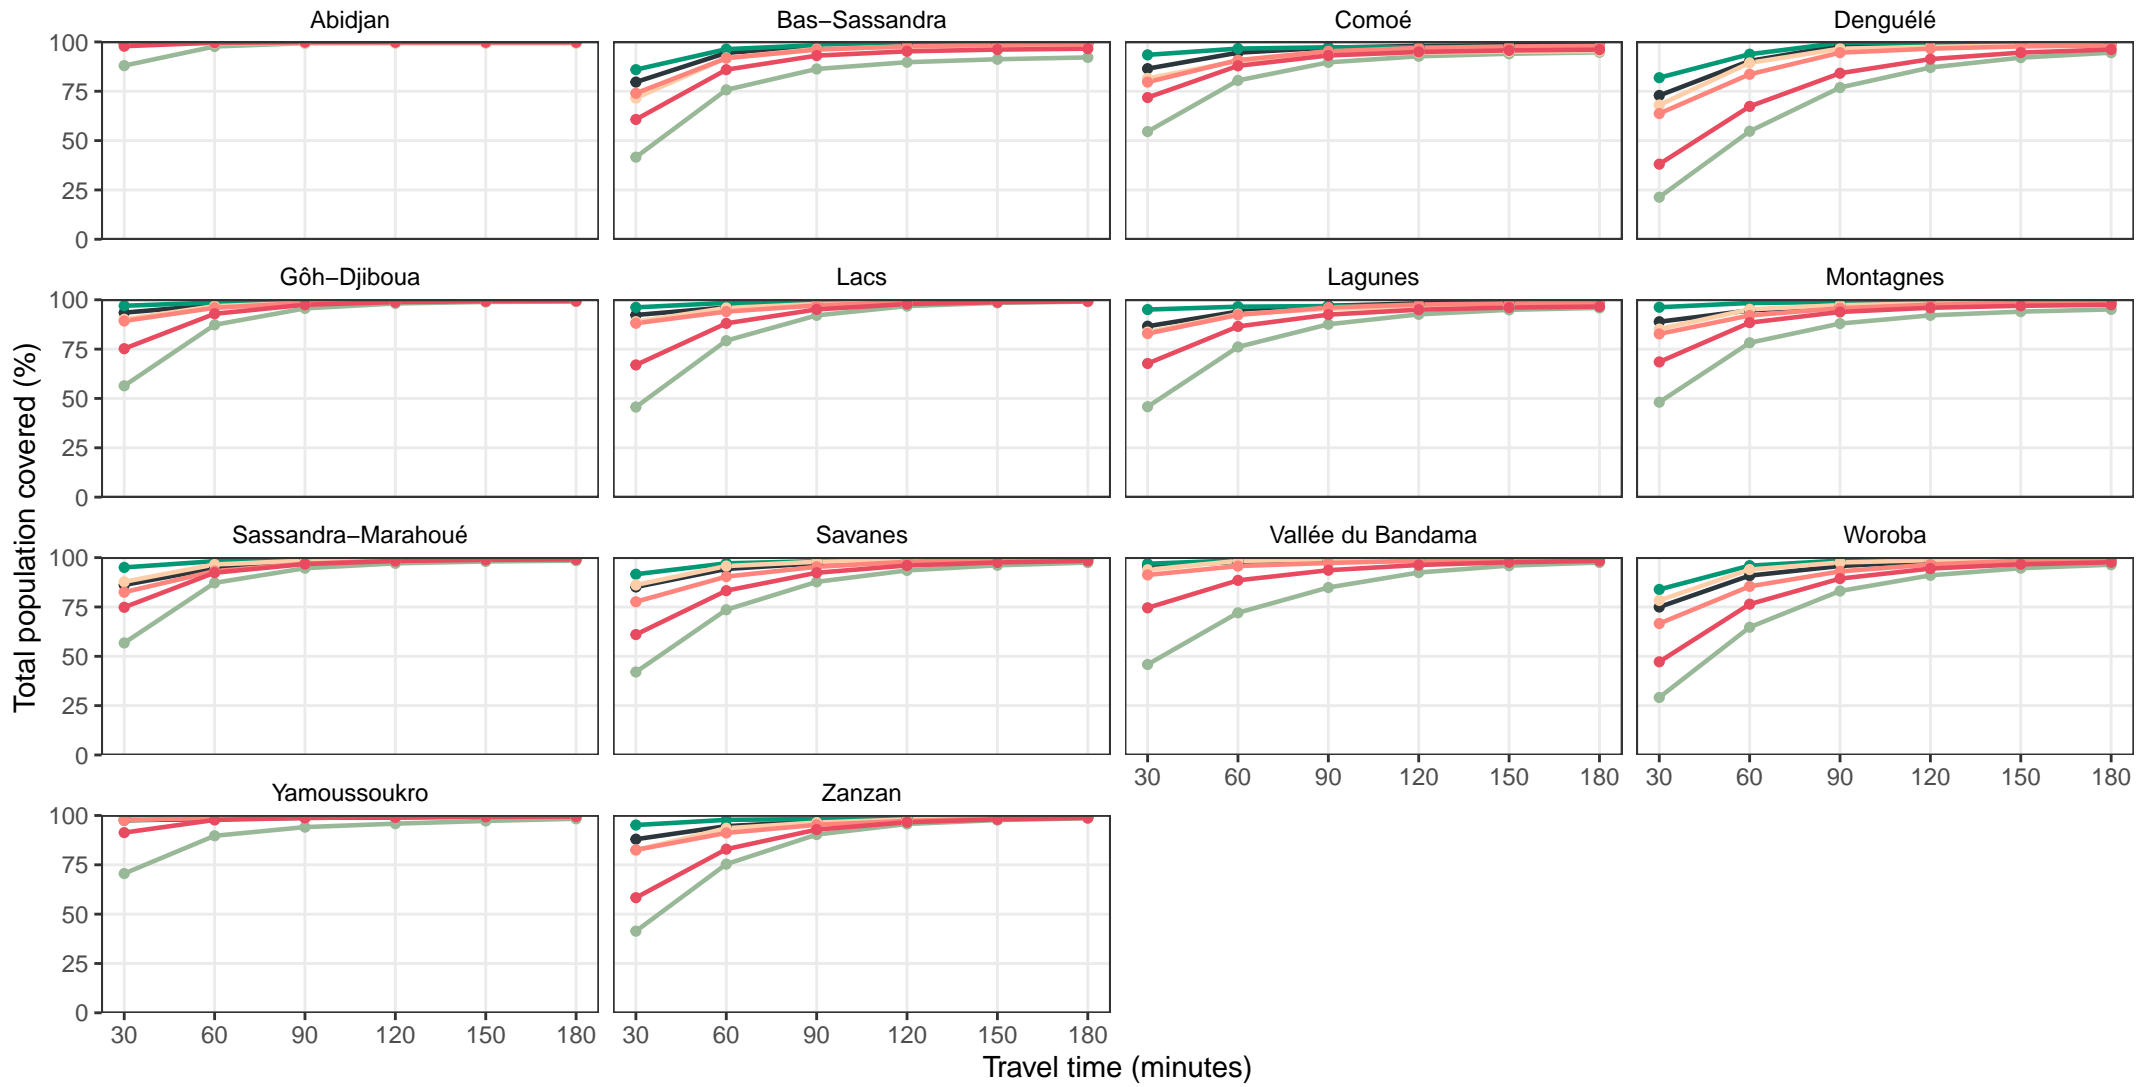

Supplementary Figure 9 – Accessibility coverage at 30, 60, 90, 120, and 150 minutes travel time at administrative level 1 for Côte d'Ivoire.

# Cameroon

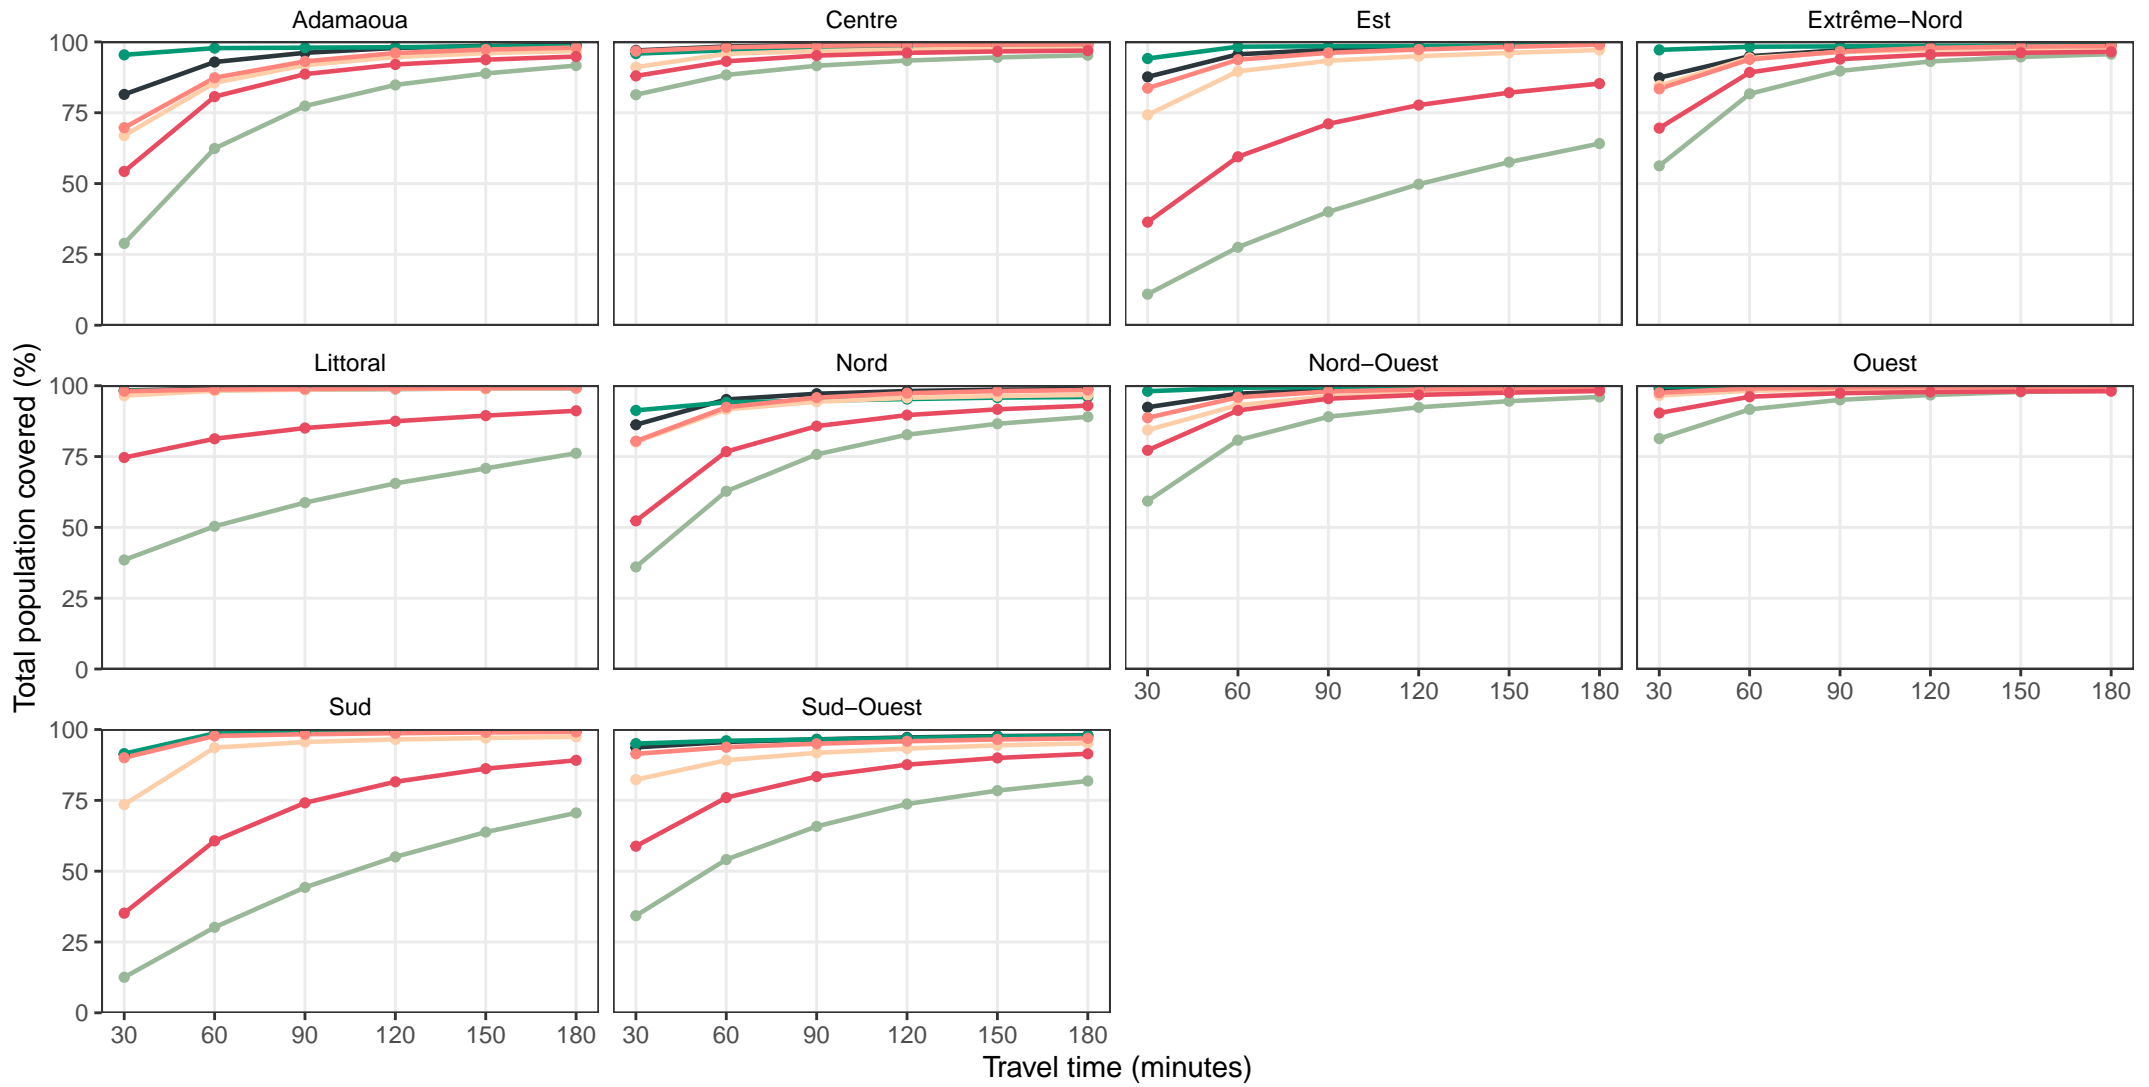

Supplementary Figure 10 – Accessibility coverage at 30, 60, 90, 120, and 150 minutes travel time at administrative level 1 for Cameroon.

# Democratic Republic of the Congo

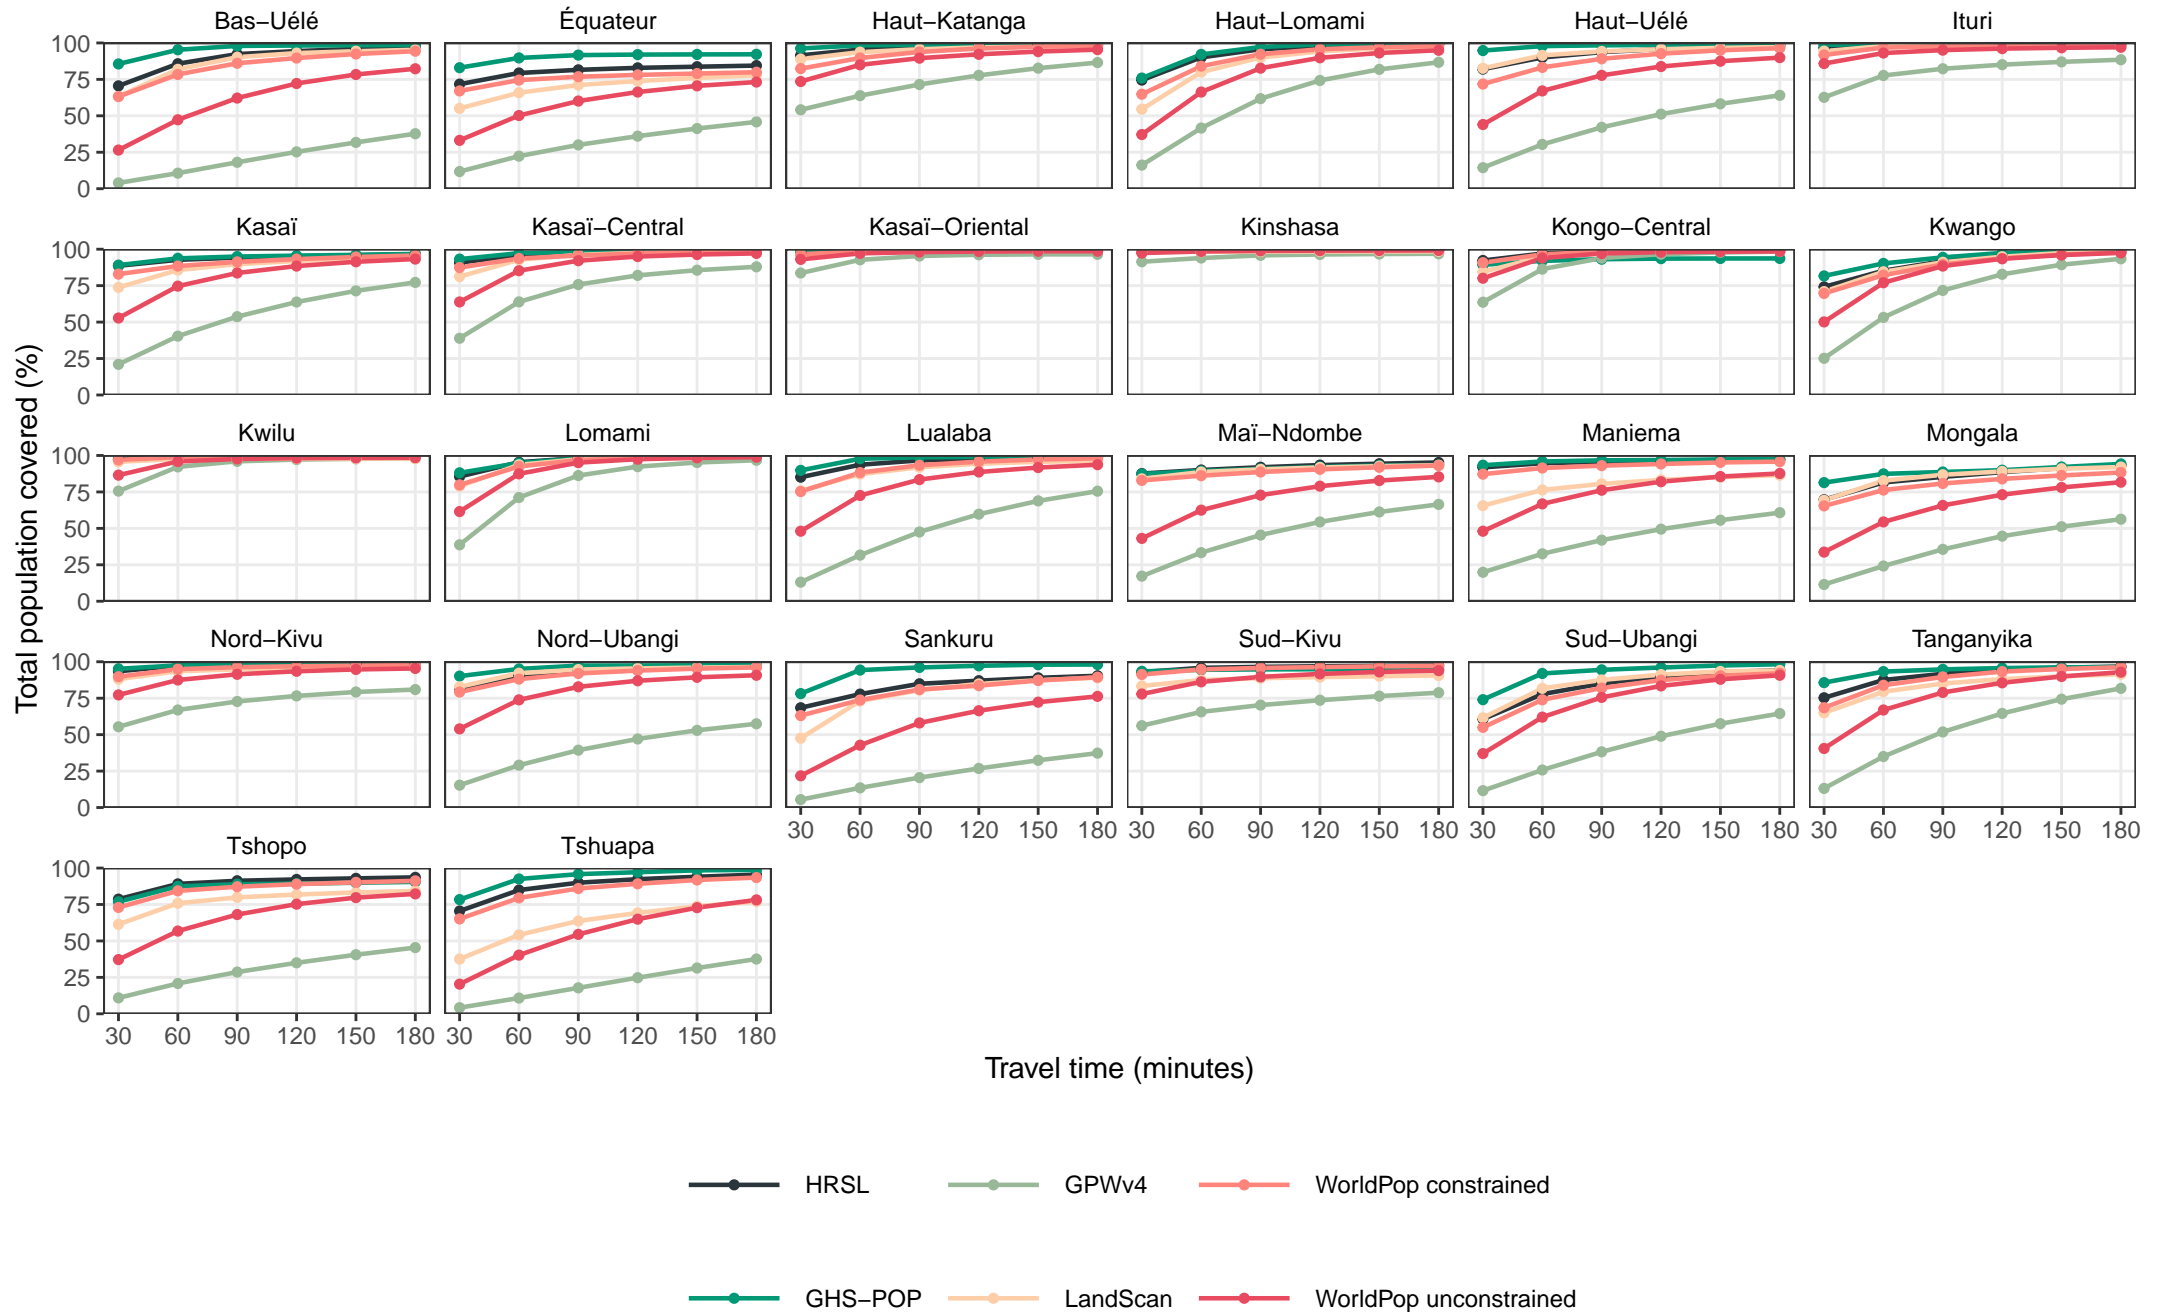

Supplementary Figure 11 – Accessibility coverage at 30, 60, 90, 120, and 150 minutes travel time at administrative level 1 for Democratic Republic of the Cong

# Republic of Congo

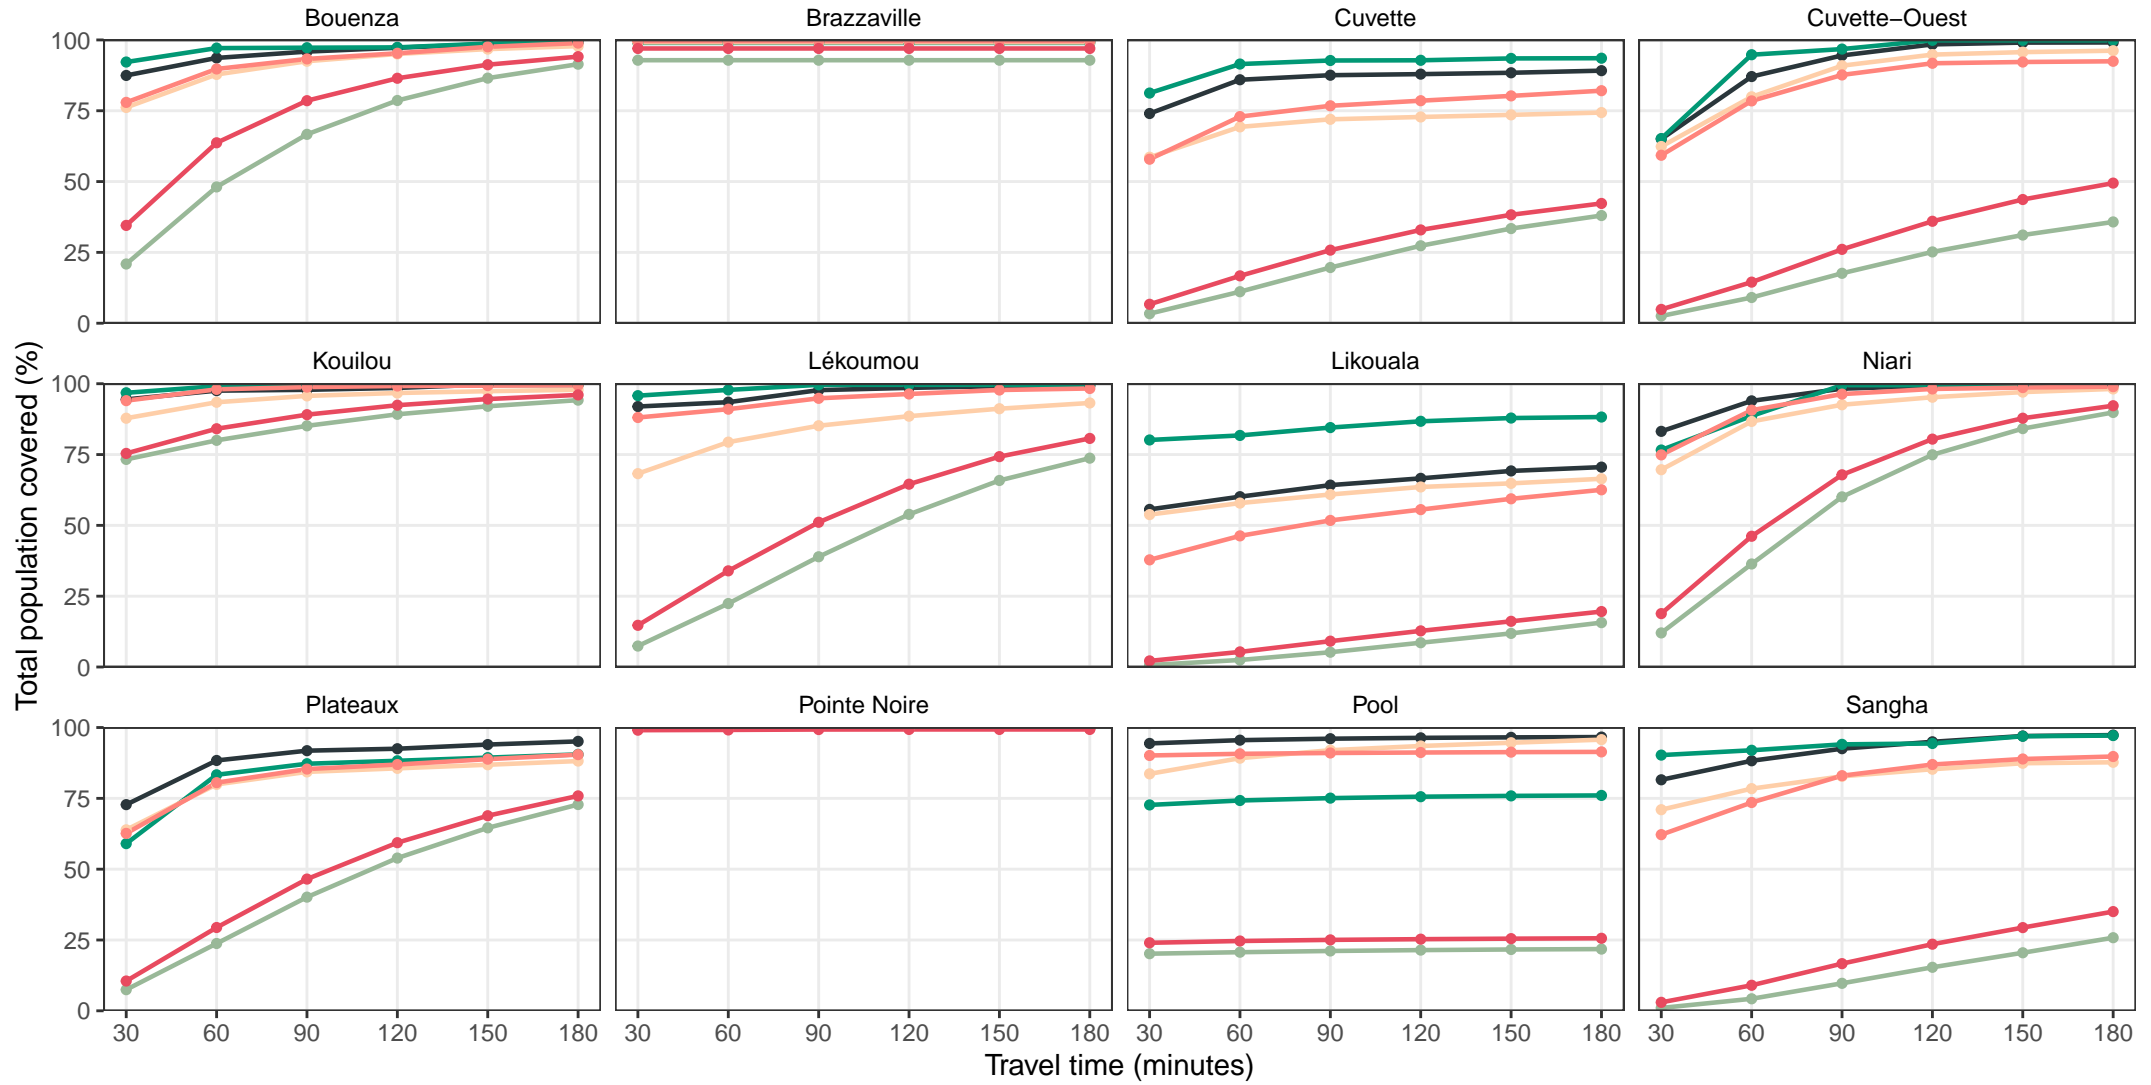

Supplementary Figure 12 – Accessibility coverage at 30, 60, 90, 120, and 150 minutes travel time at administrative level 1 for Republic of Congo.



# Comoros

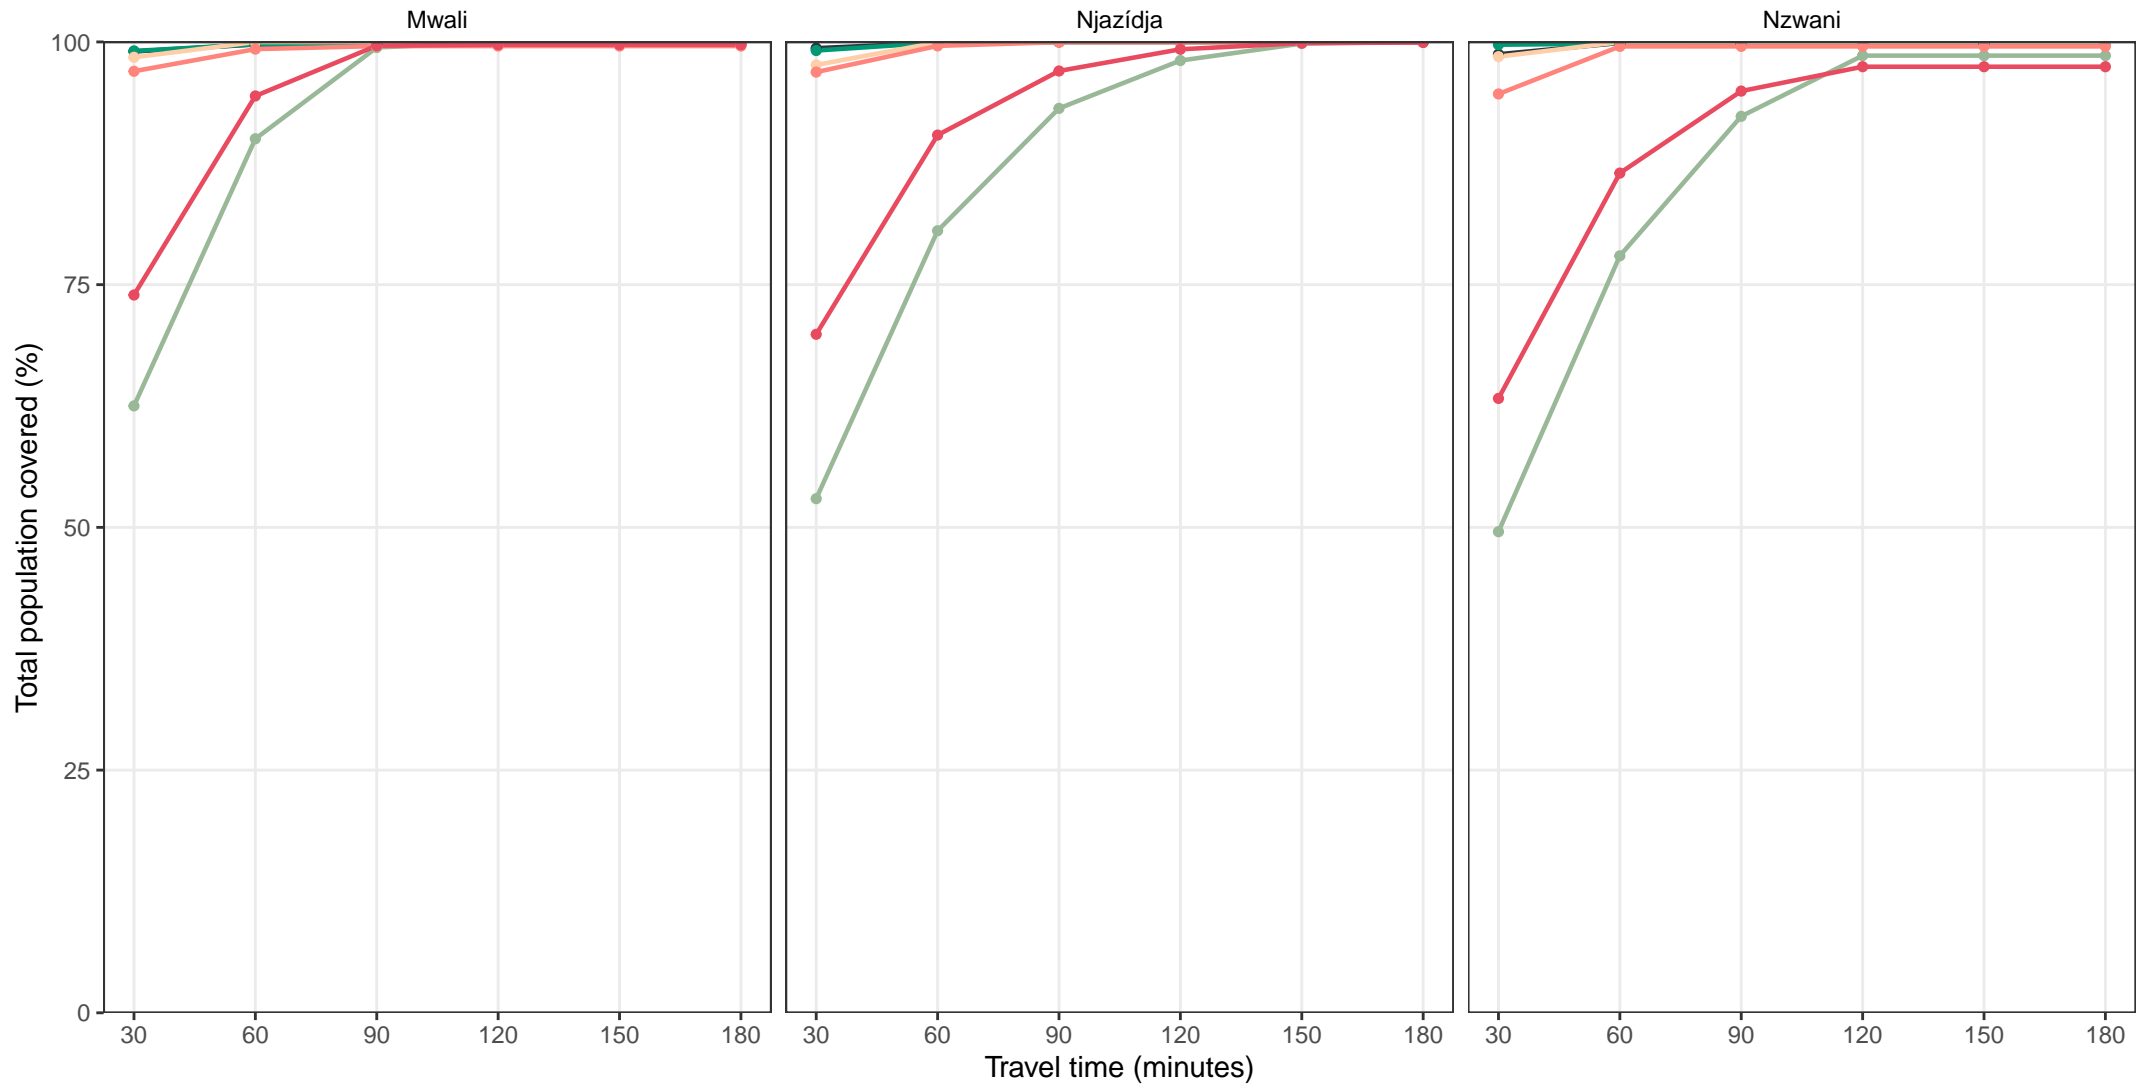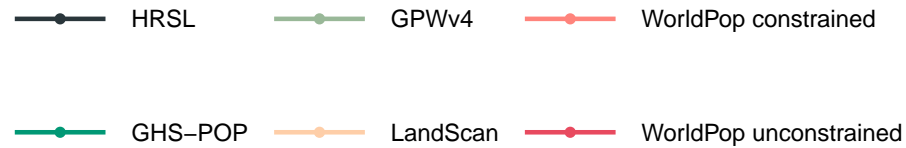

Supplementary Figure 13 – Accessibility coverage at 30, 60, 90, 120, and 150 minutes travel time at administrative level 1 for Comoros.

# Cape Verde

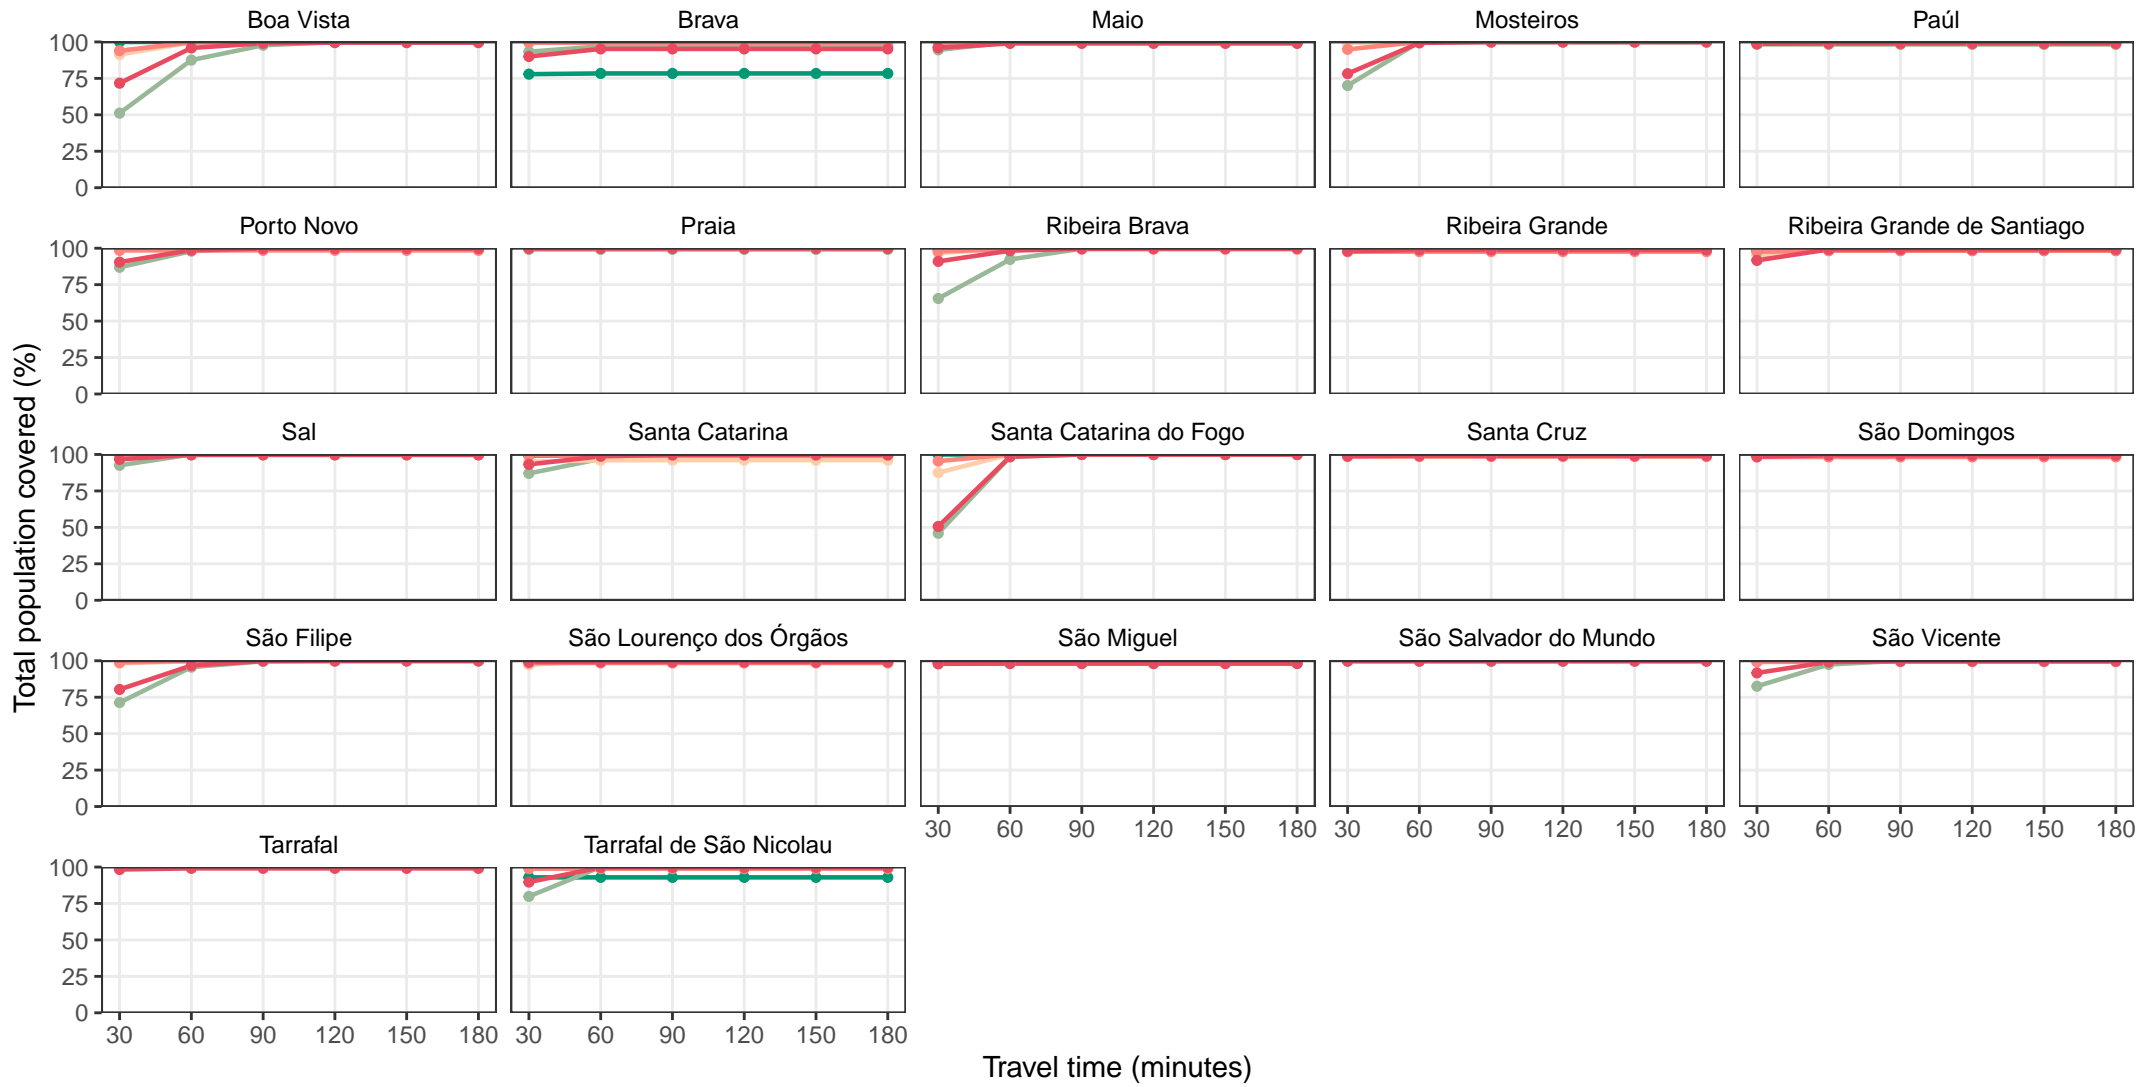

Supplementary Figure 14 – Accessibility coverage at 30, 60, 90, 120, and 150 minutes travel time at administrative level 1 for Cape Verde.

# Djibouti

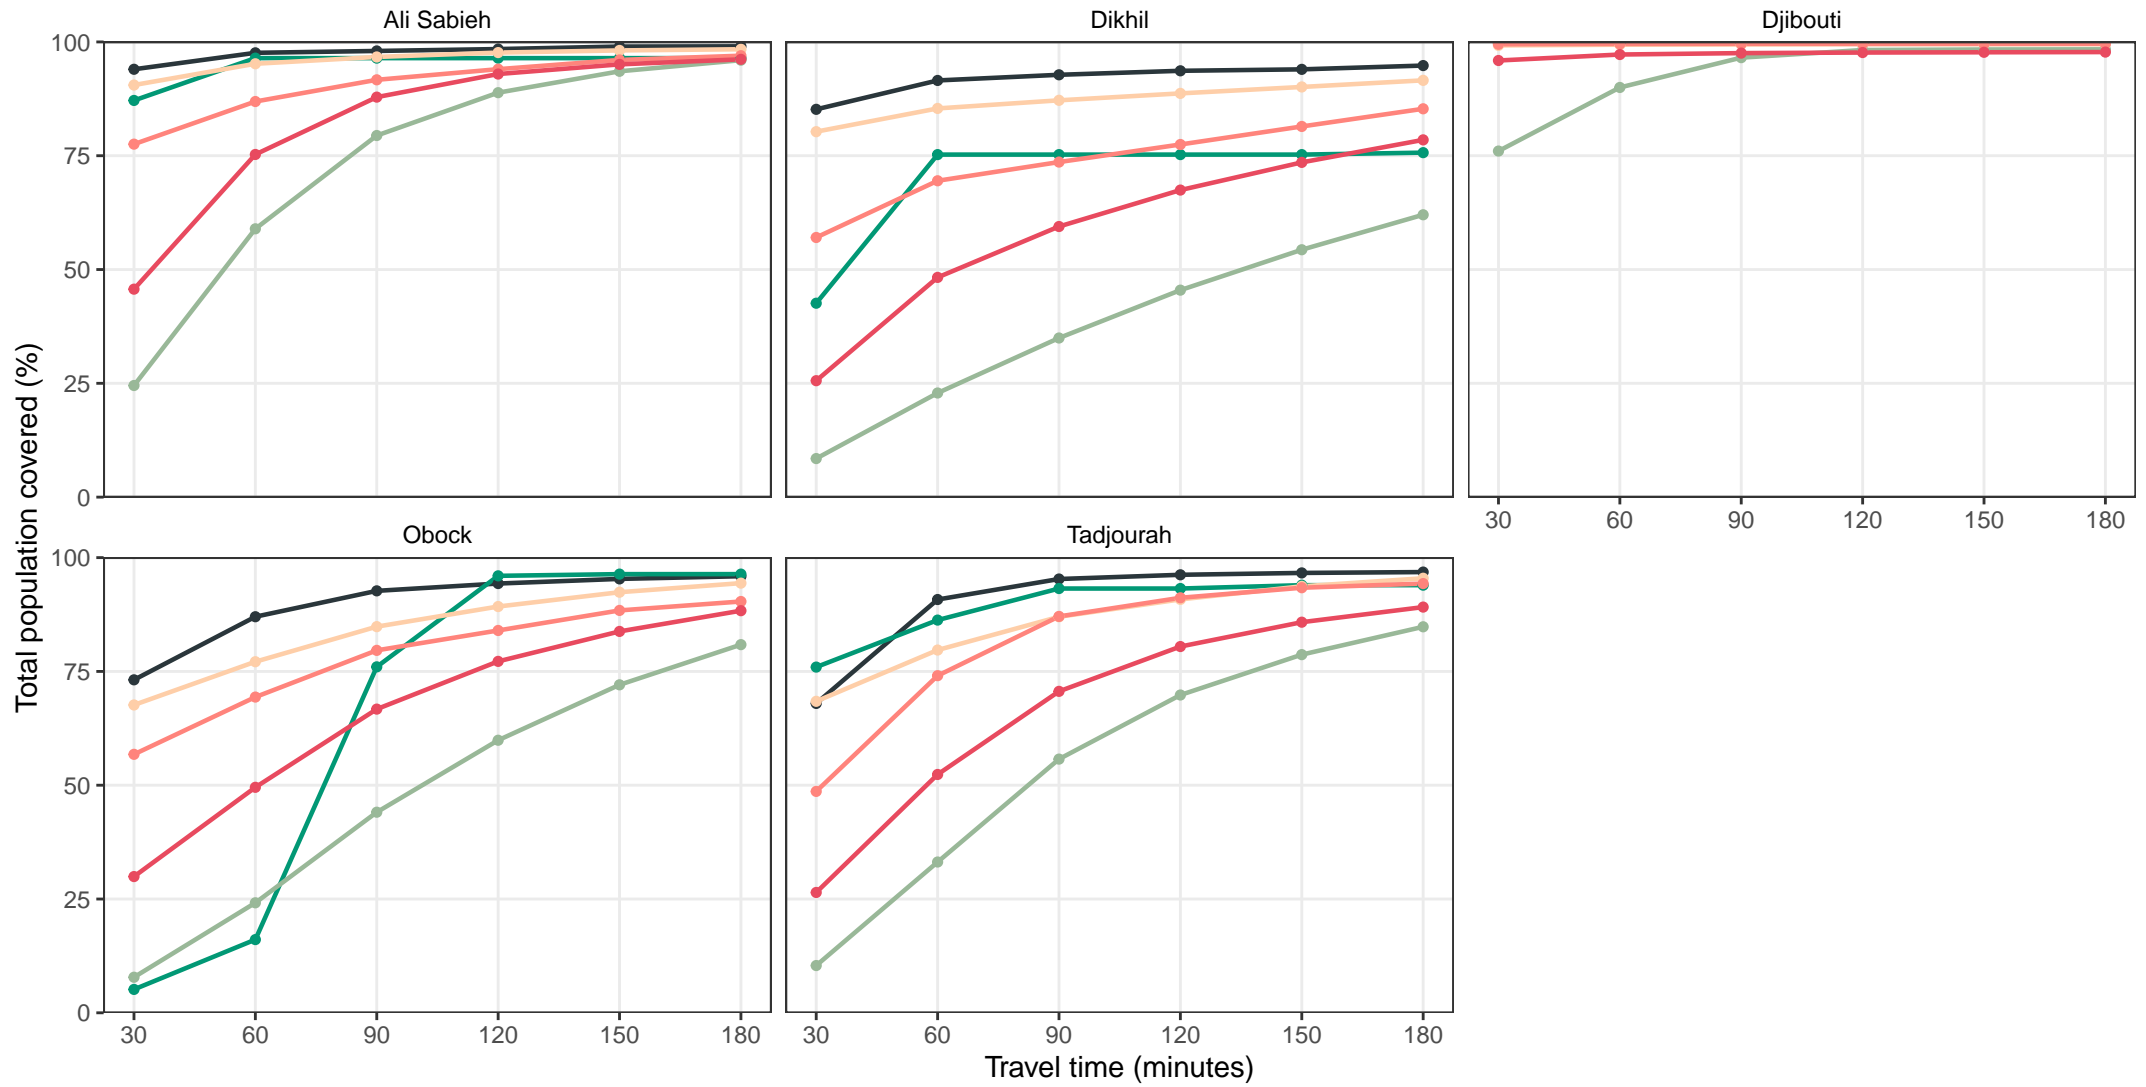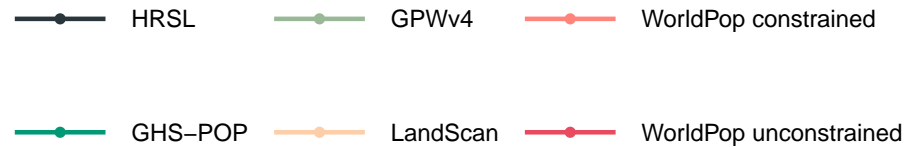

Supplementary Figure 15 – Accessibility coverage at 30, 60, 90, 120, and 150 minutes travel time at administrative level 1 for Djibouti.

# Eritrea

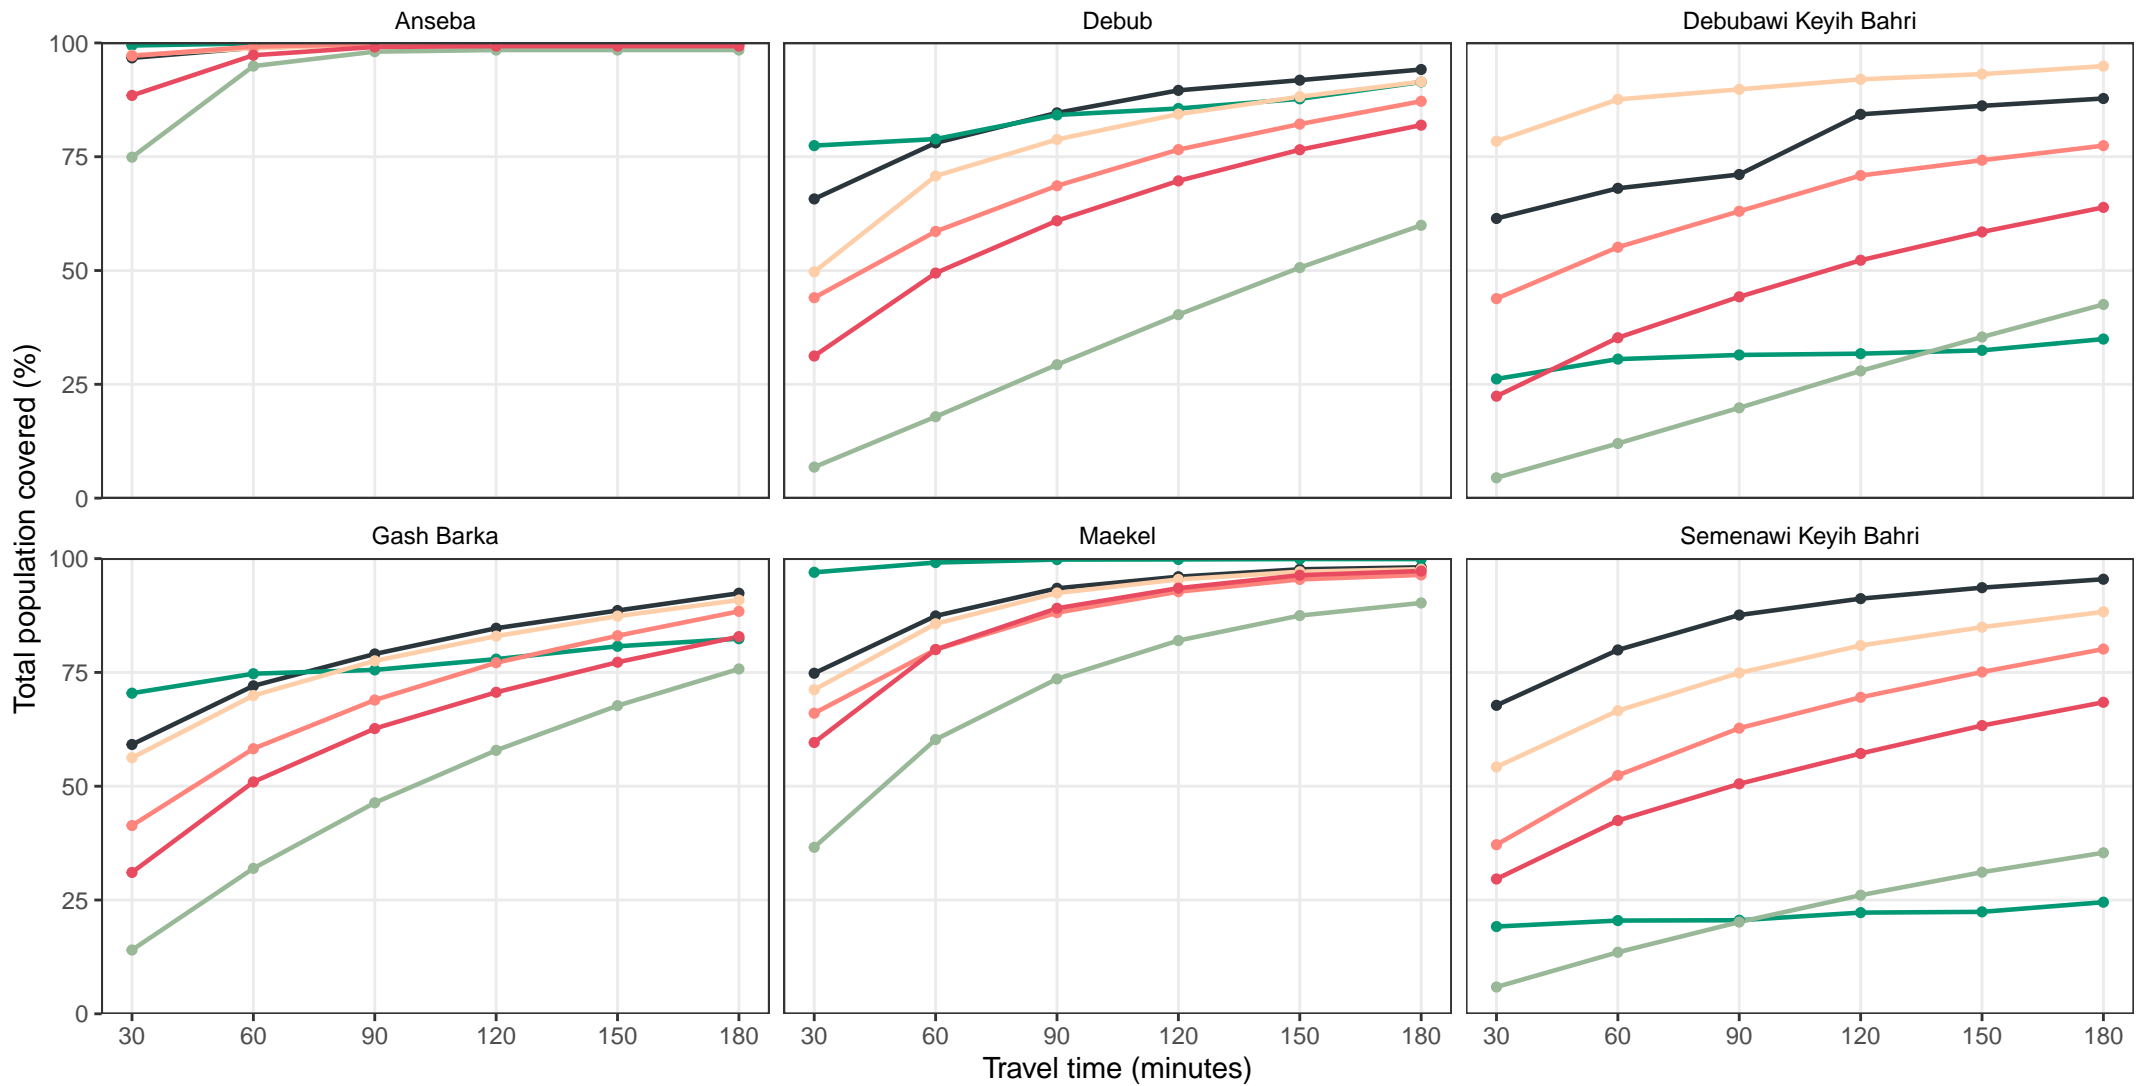

Supplementary Figure 16 – Accessibility coverage at 30, 60, 90, 120, and 150 minutes travel time at administrative level 1 for Eritrea.

# Ethiopia

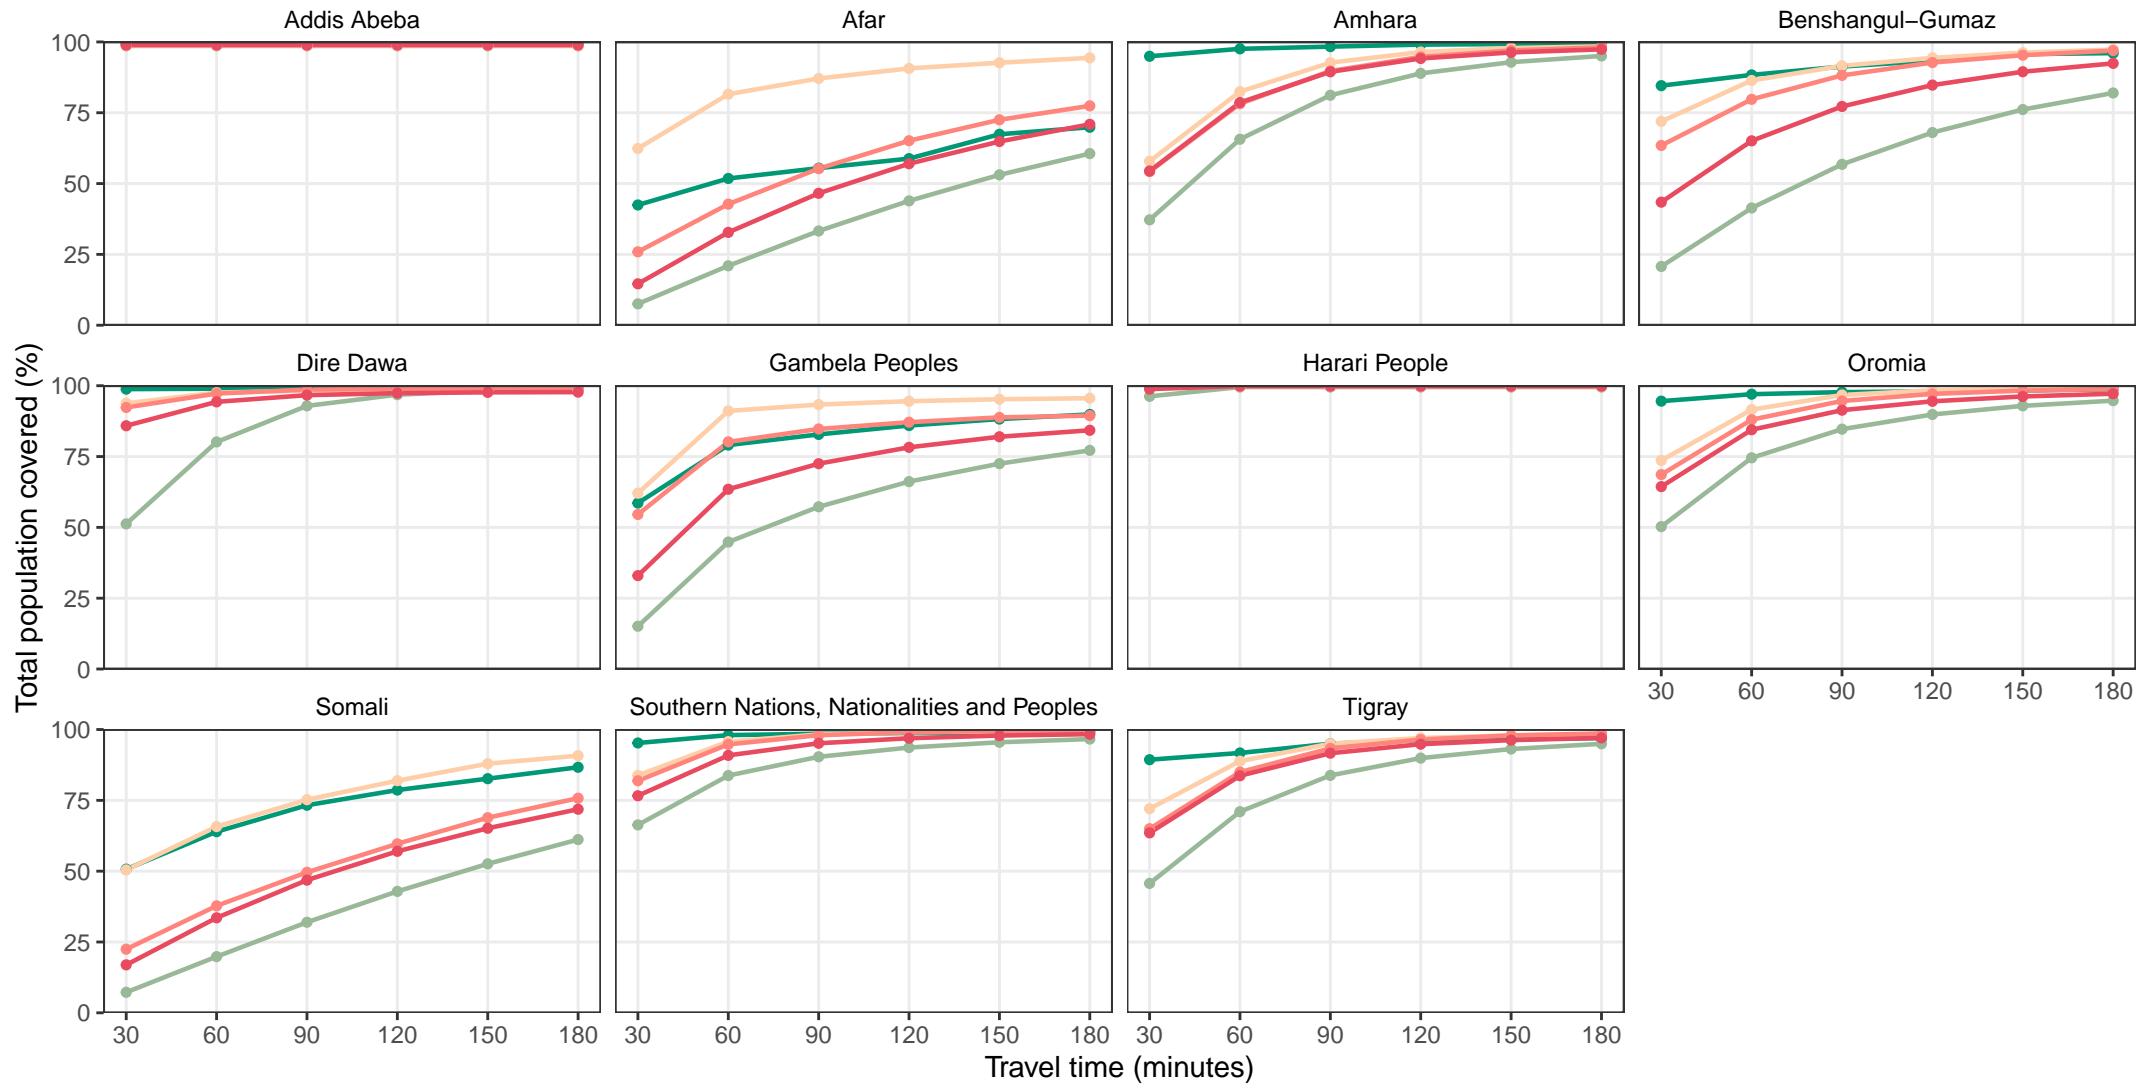

Supplementary Figure 17 – Accessibility coverage at 30, 60, 90, 120, and 150 minutes travel time at administrative level 1 for Ethiopia.

# Gabon

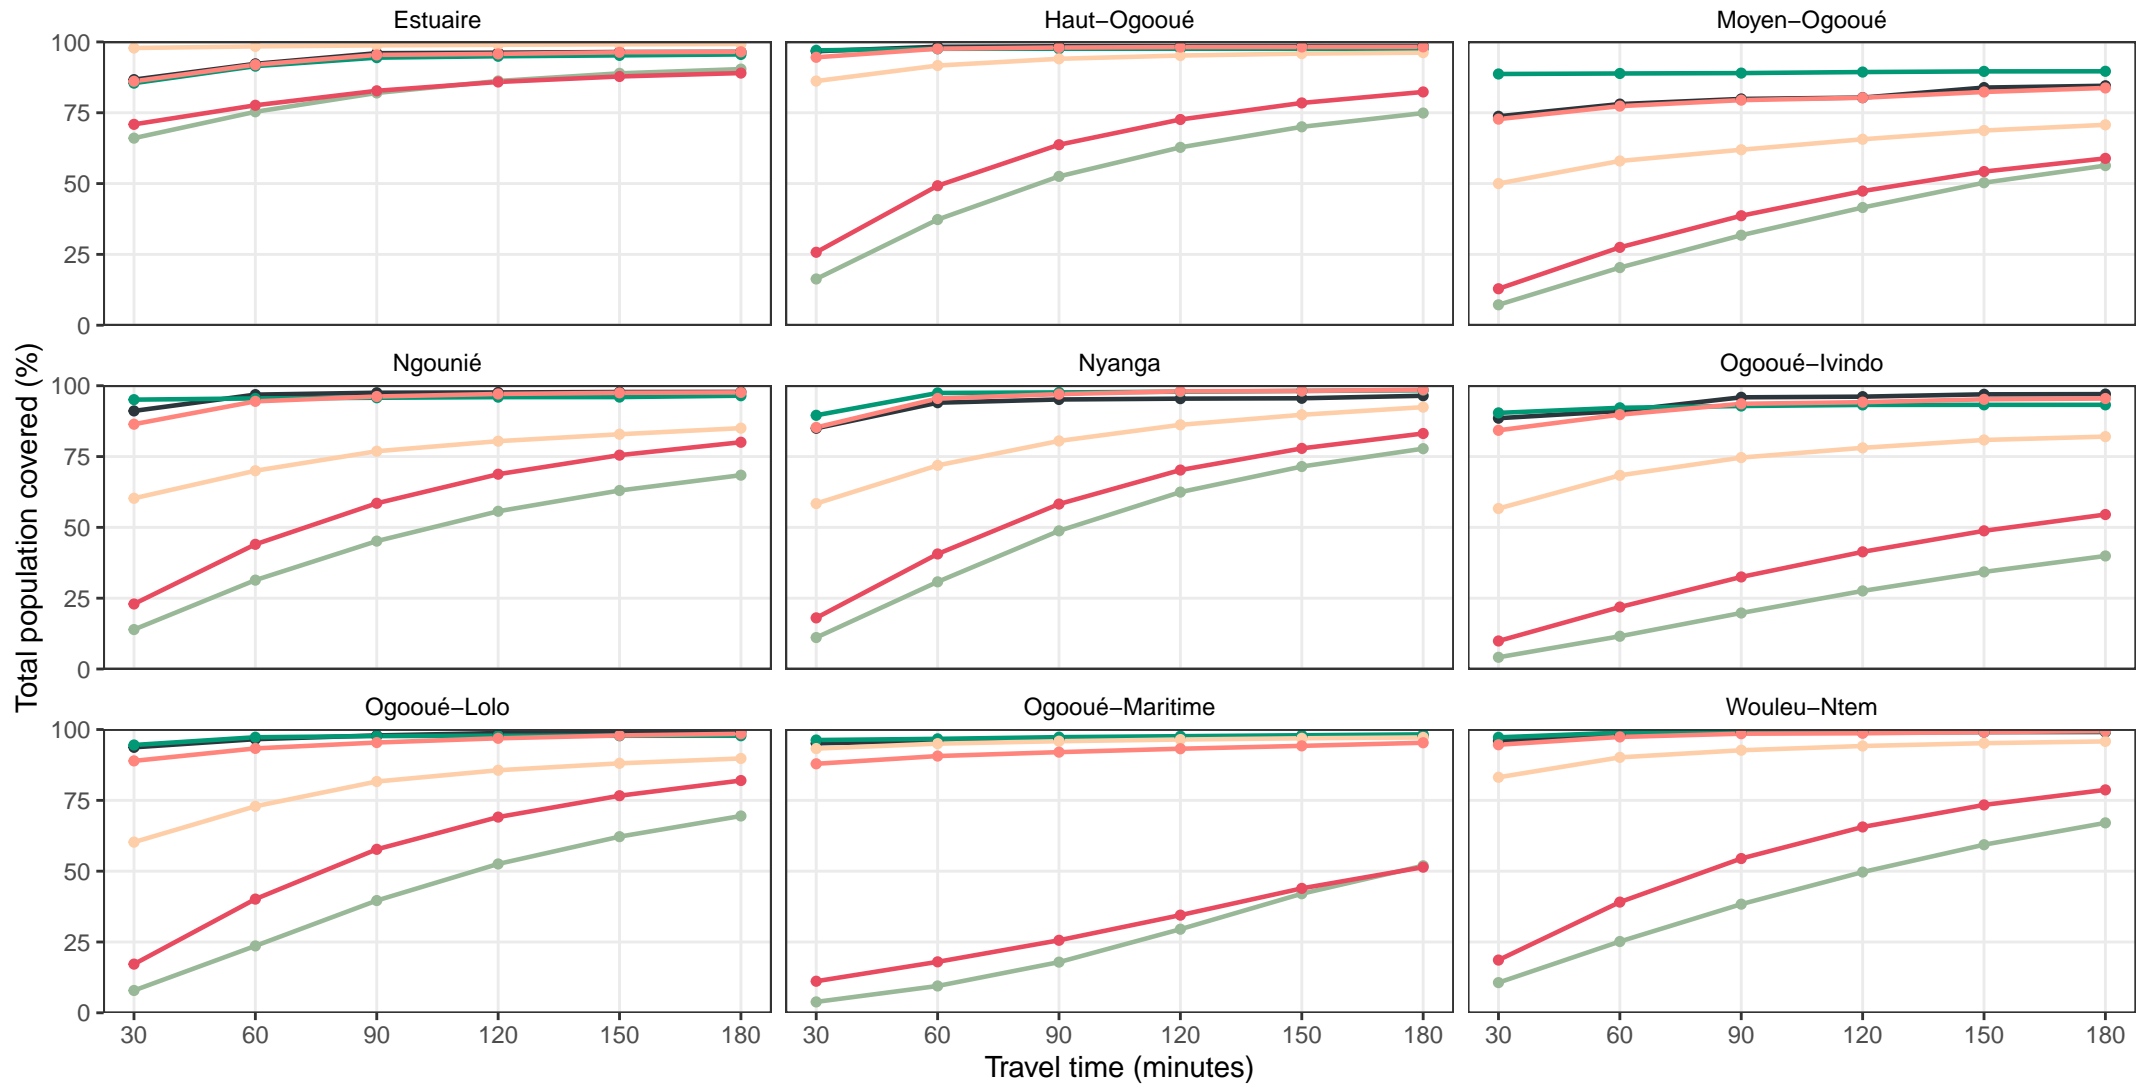

Supplementary Figure 18 – Accessibility coverage at 30, 60, 90, 120, and 150 minutes travel time at administrative level 1 for Gabon.

# Ghana

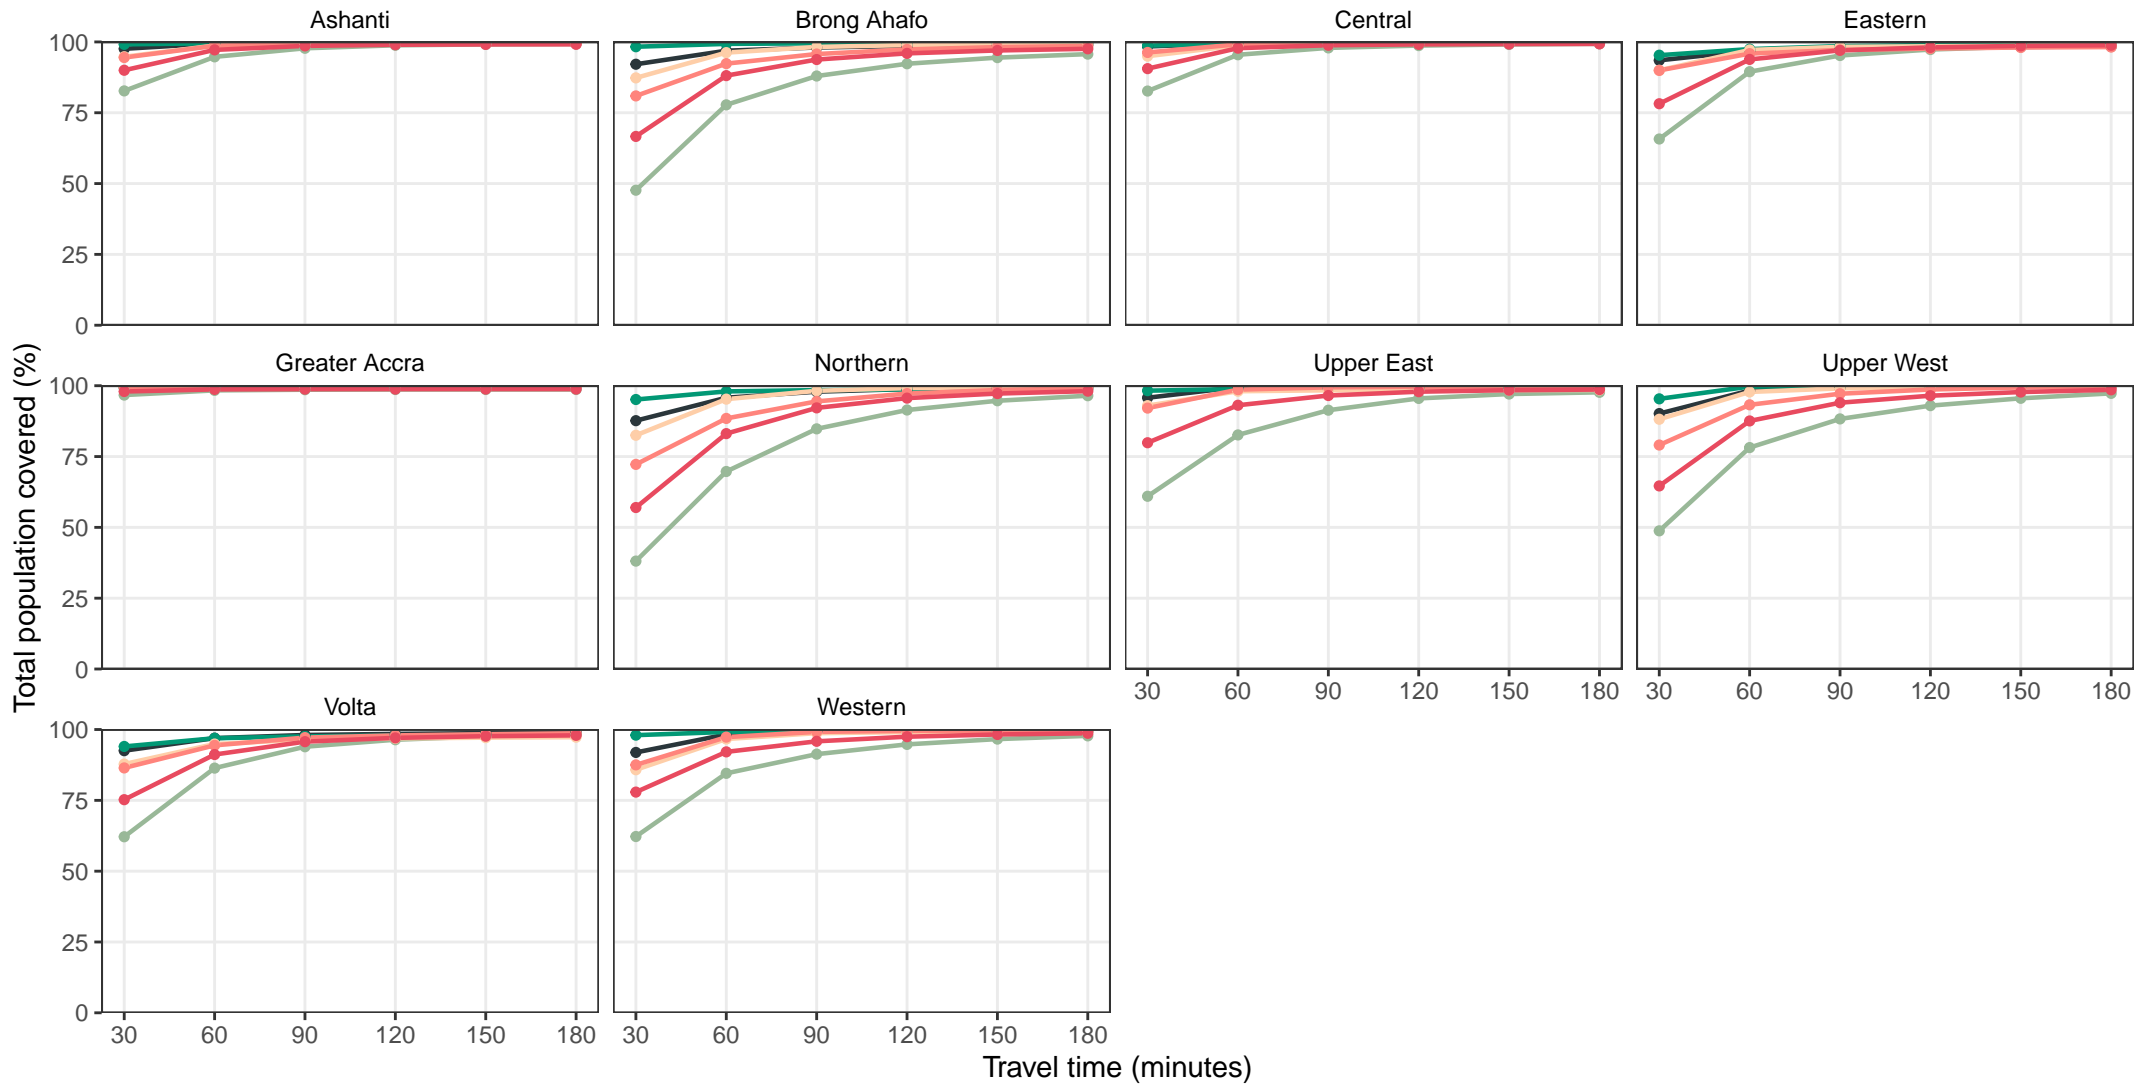

Supplementary Figure 19 – Accessibility coverage at 30, 60, 90, 120, and 150 minutes travel time at administrative level 1 for Ghana.

# Guinea

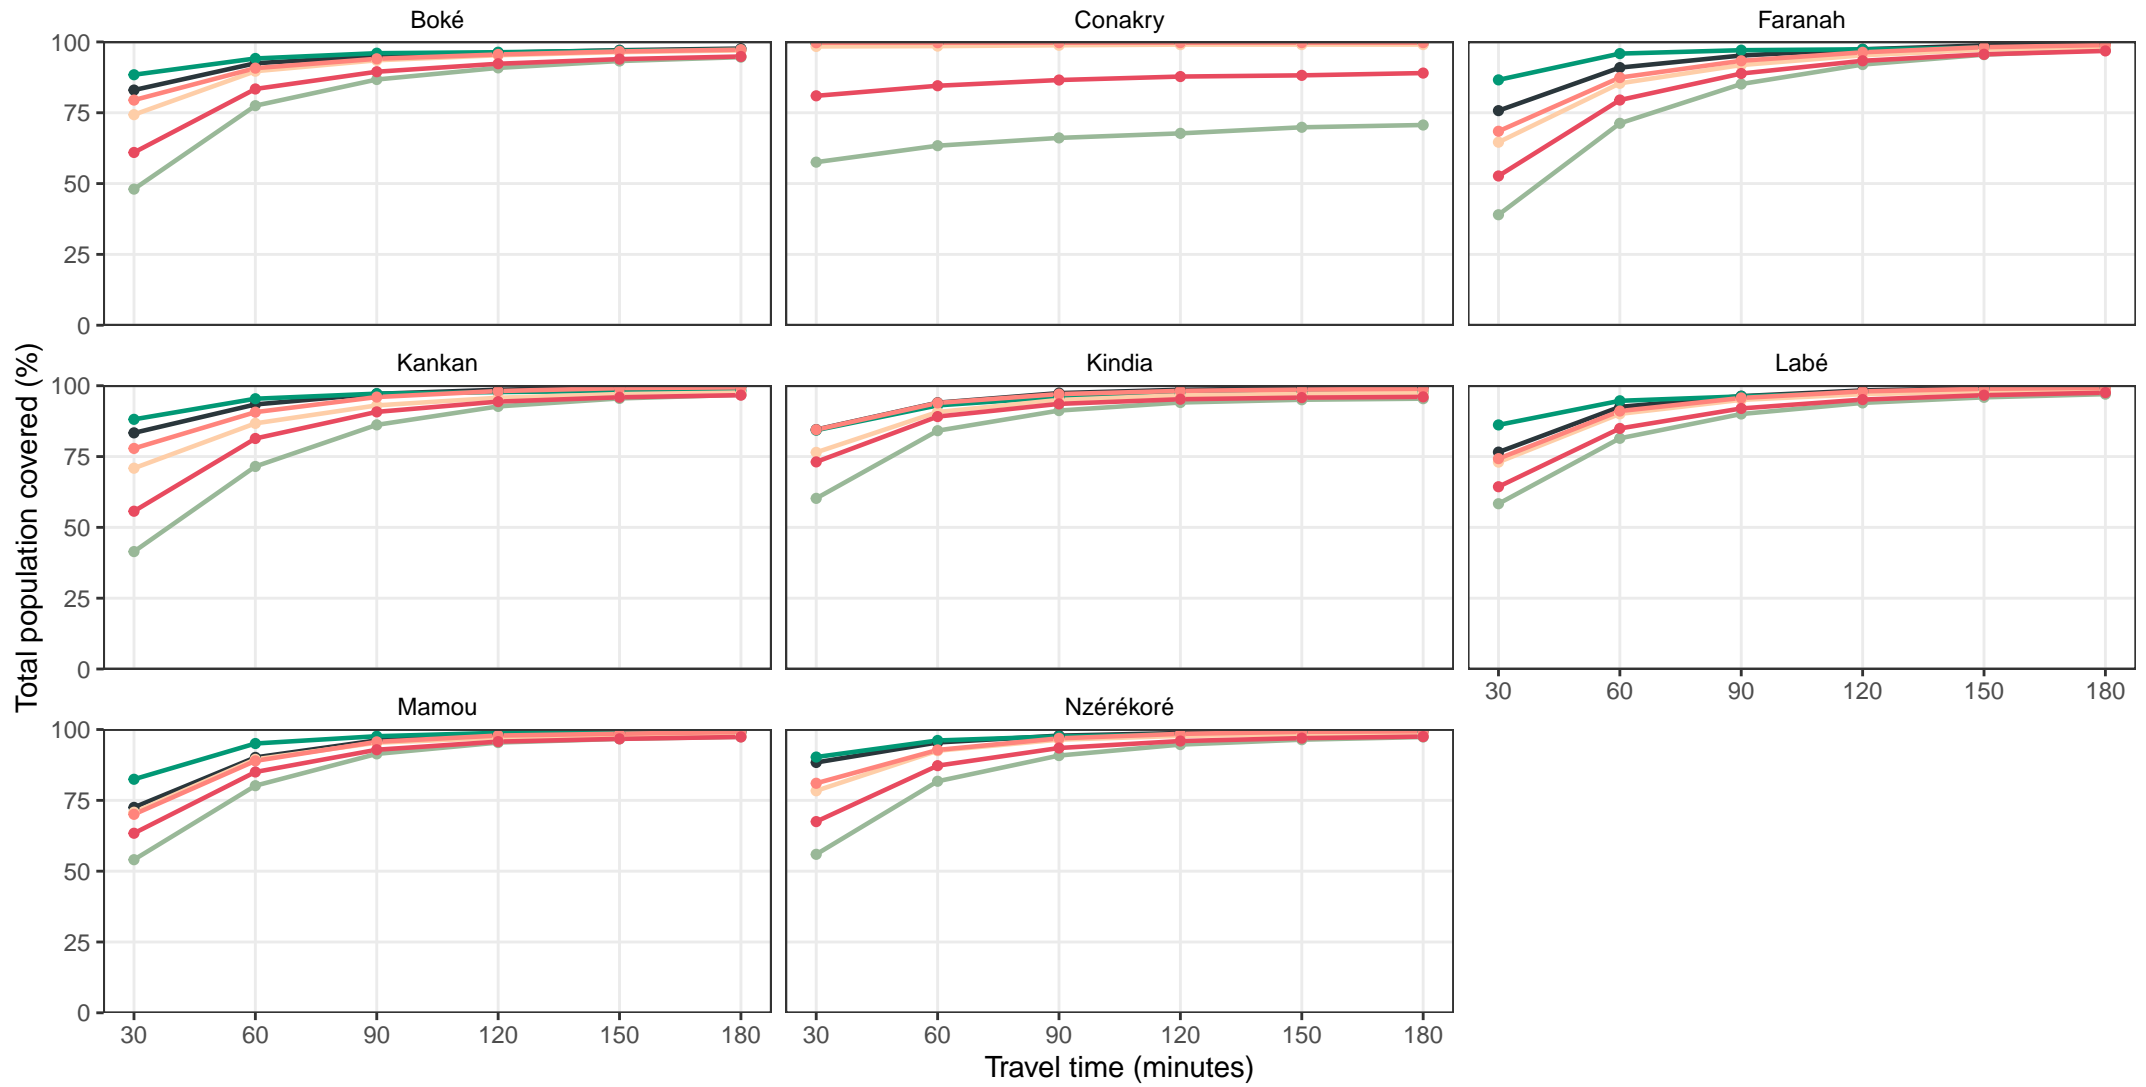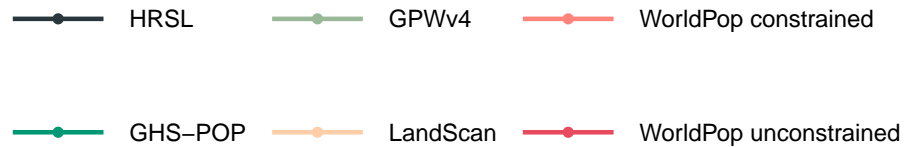

Supplementary Figure 20 – Accessibility coverage at 30, 60, 90, 120, and 150 minutes travel time at administrative level 1 for Guinea.



# Gambia

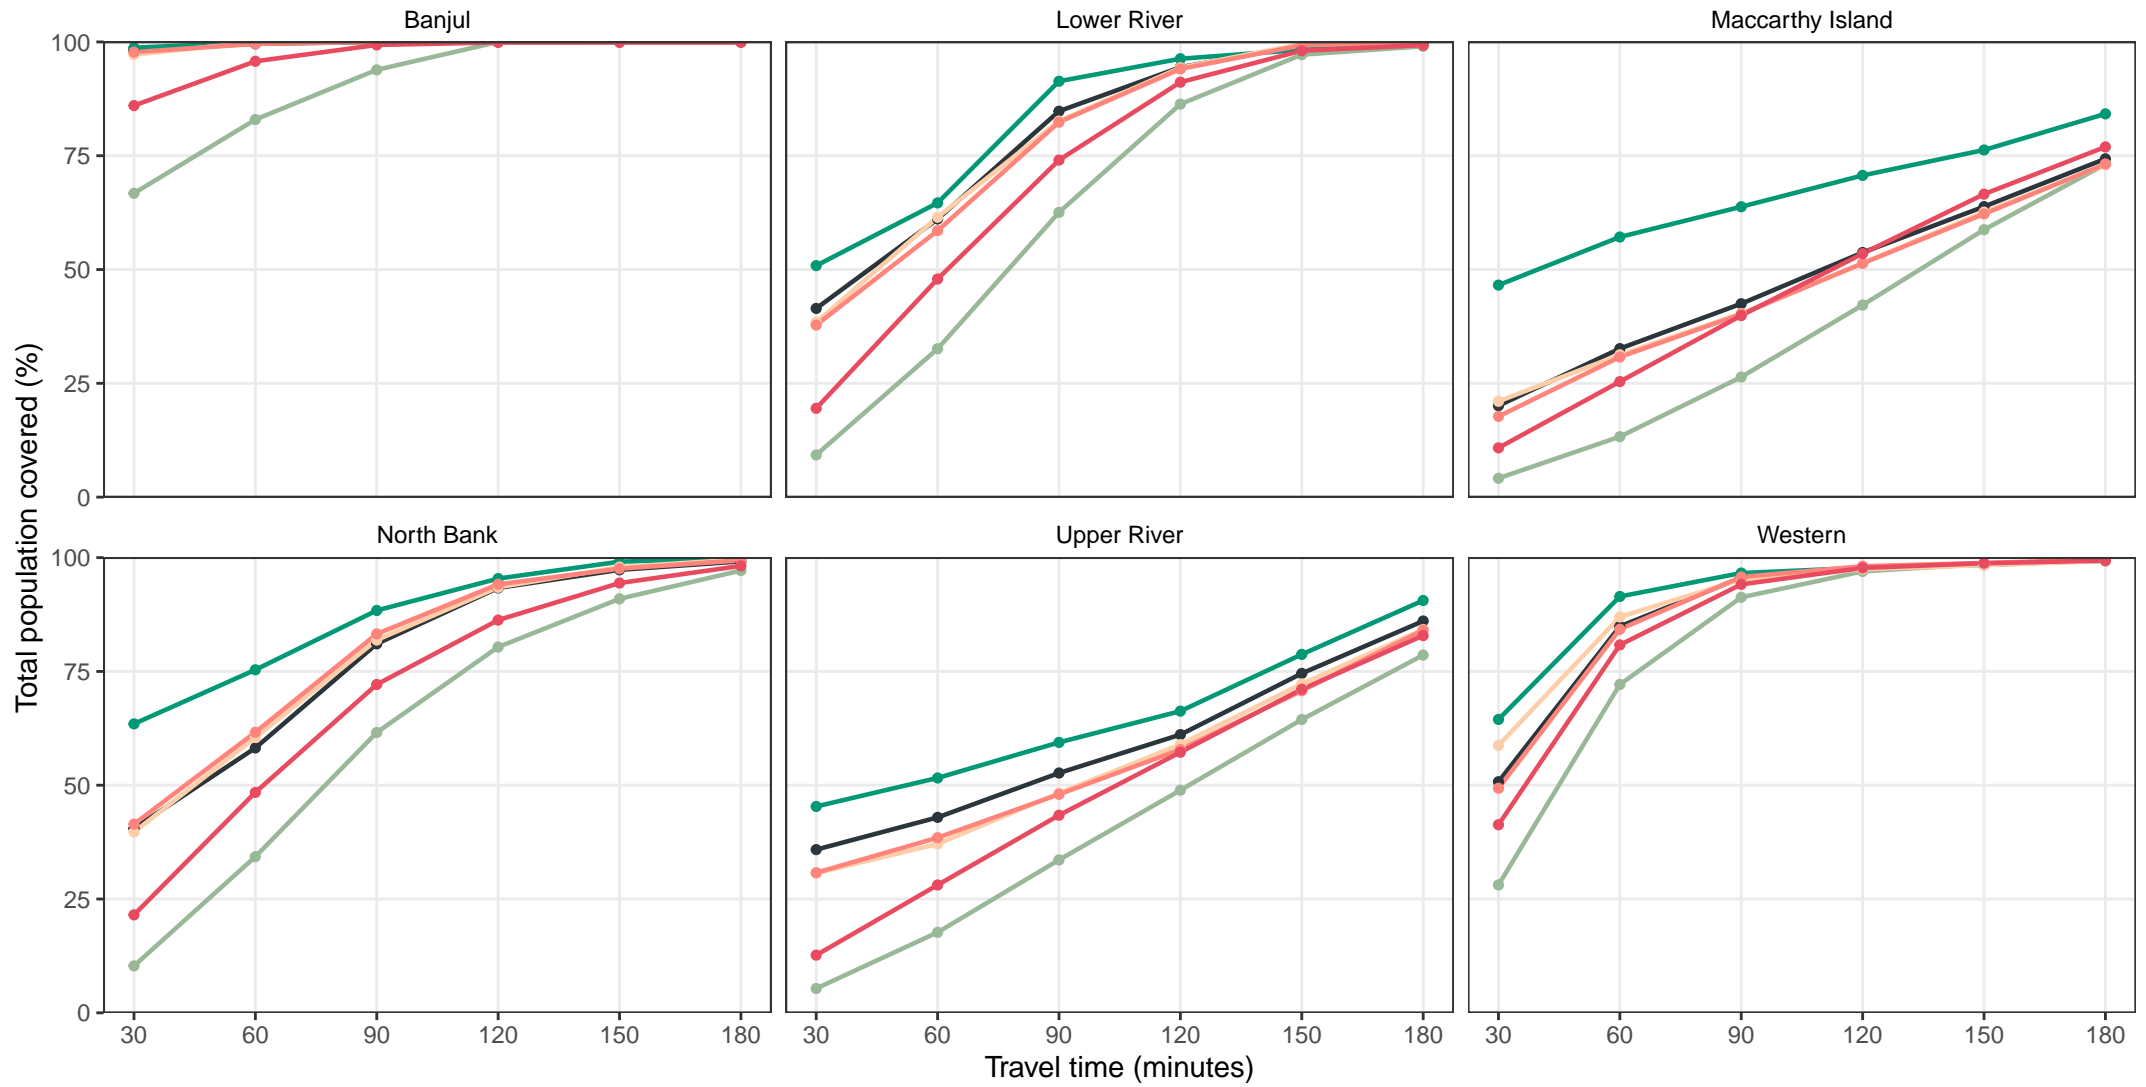

Supplementary Figure 21 – Accessibility coverage at 30, 60, 90, 120, and 150 minutes travel time at administrative level 1 for Gambia.

# Guinea-Bissau

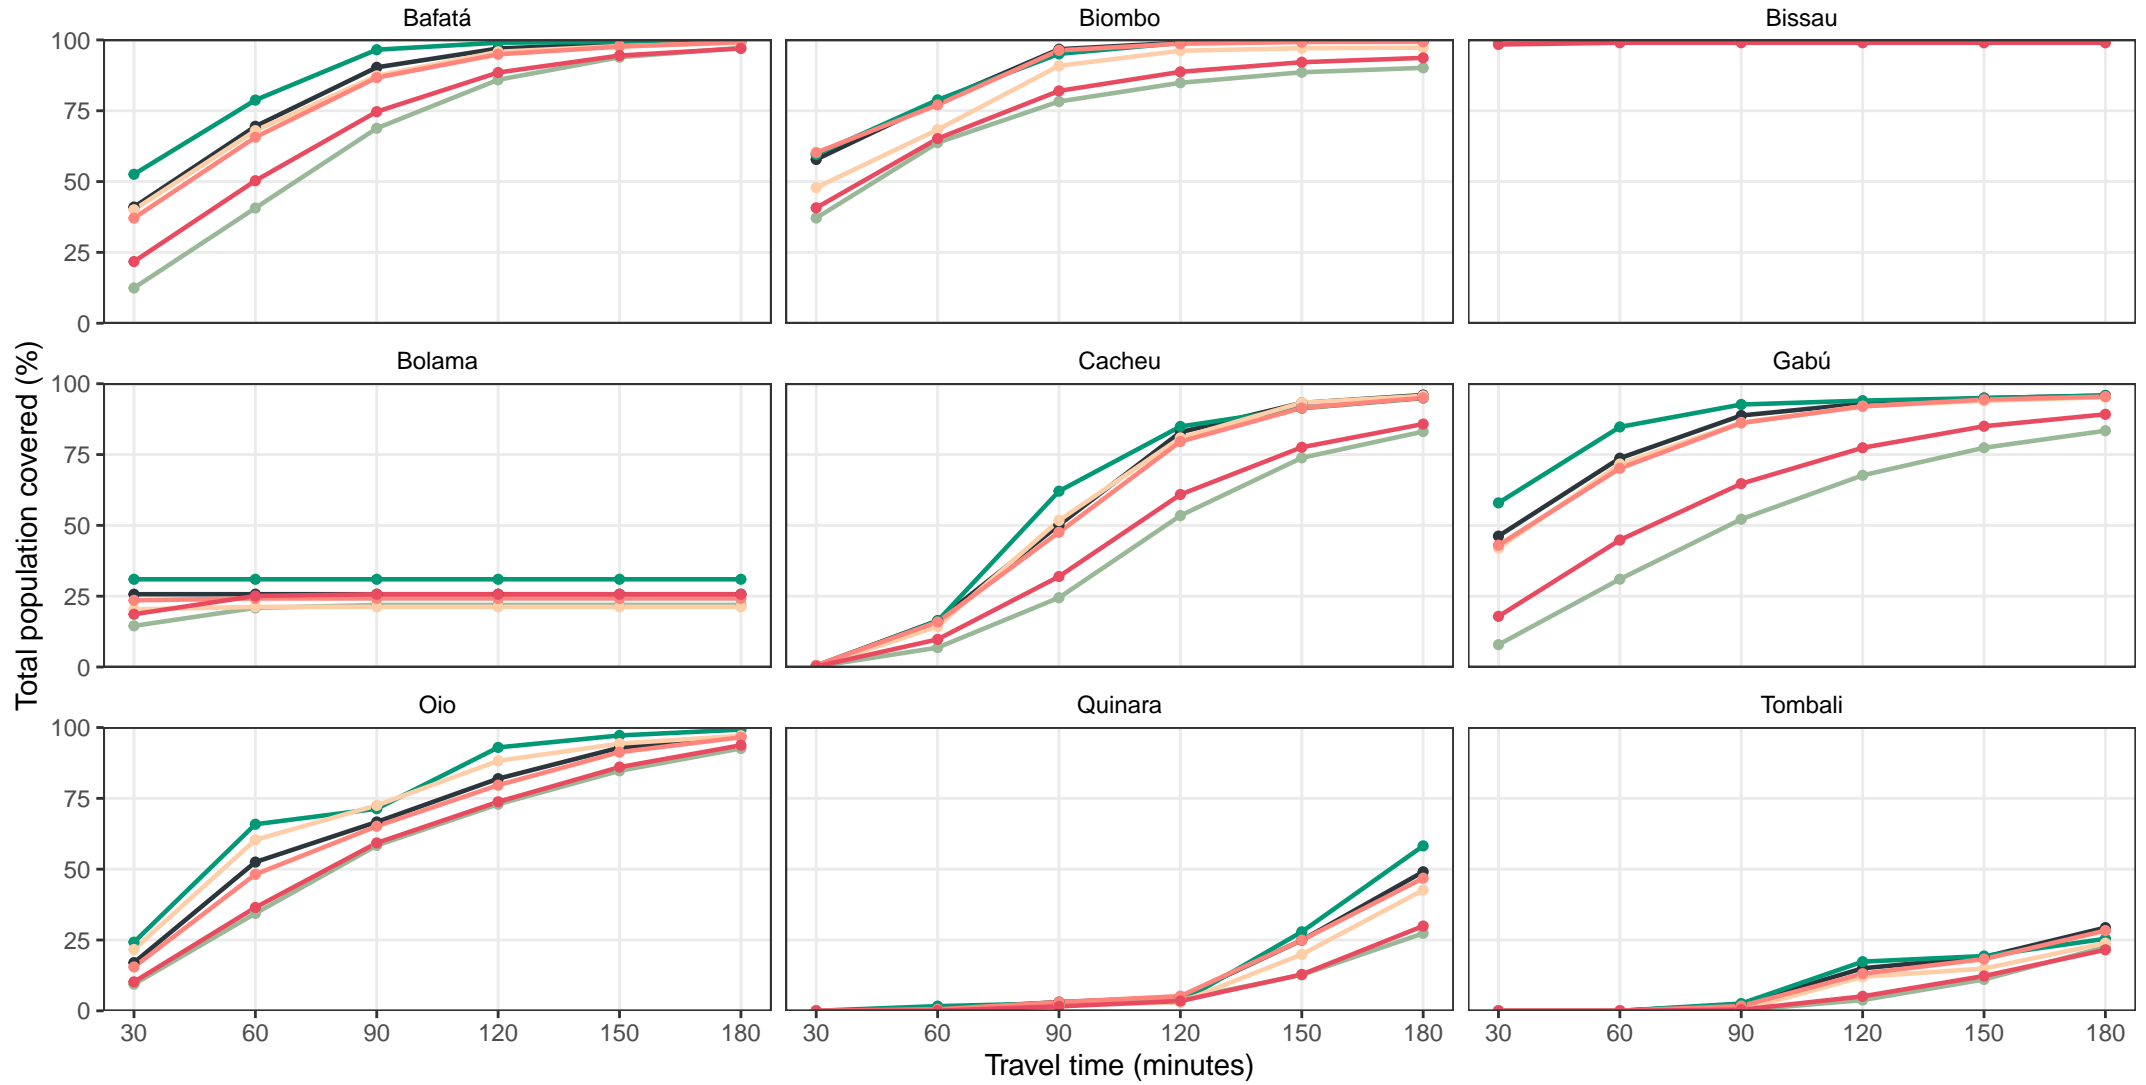

Supplementary Figure 22 – Accessibility coverage at 30, 60, 90, 120, and 150 minutes travel time at administrative level 1 for Guinea-Bissau.

# Equatorial Guinea

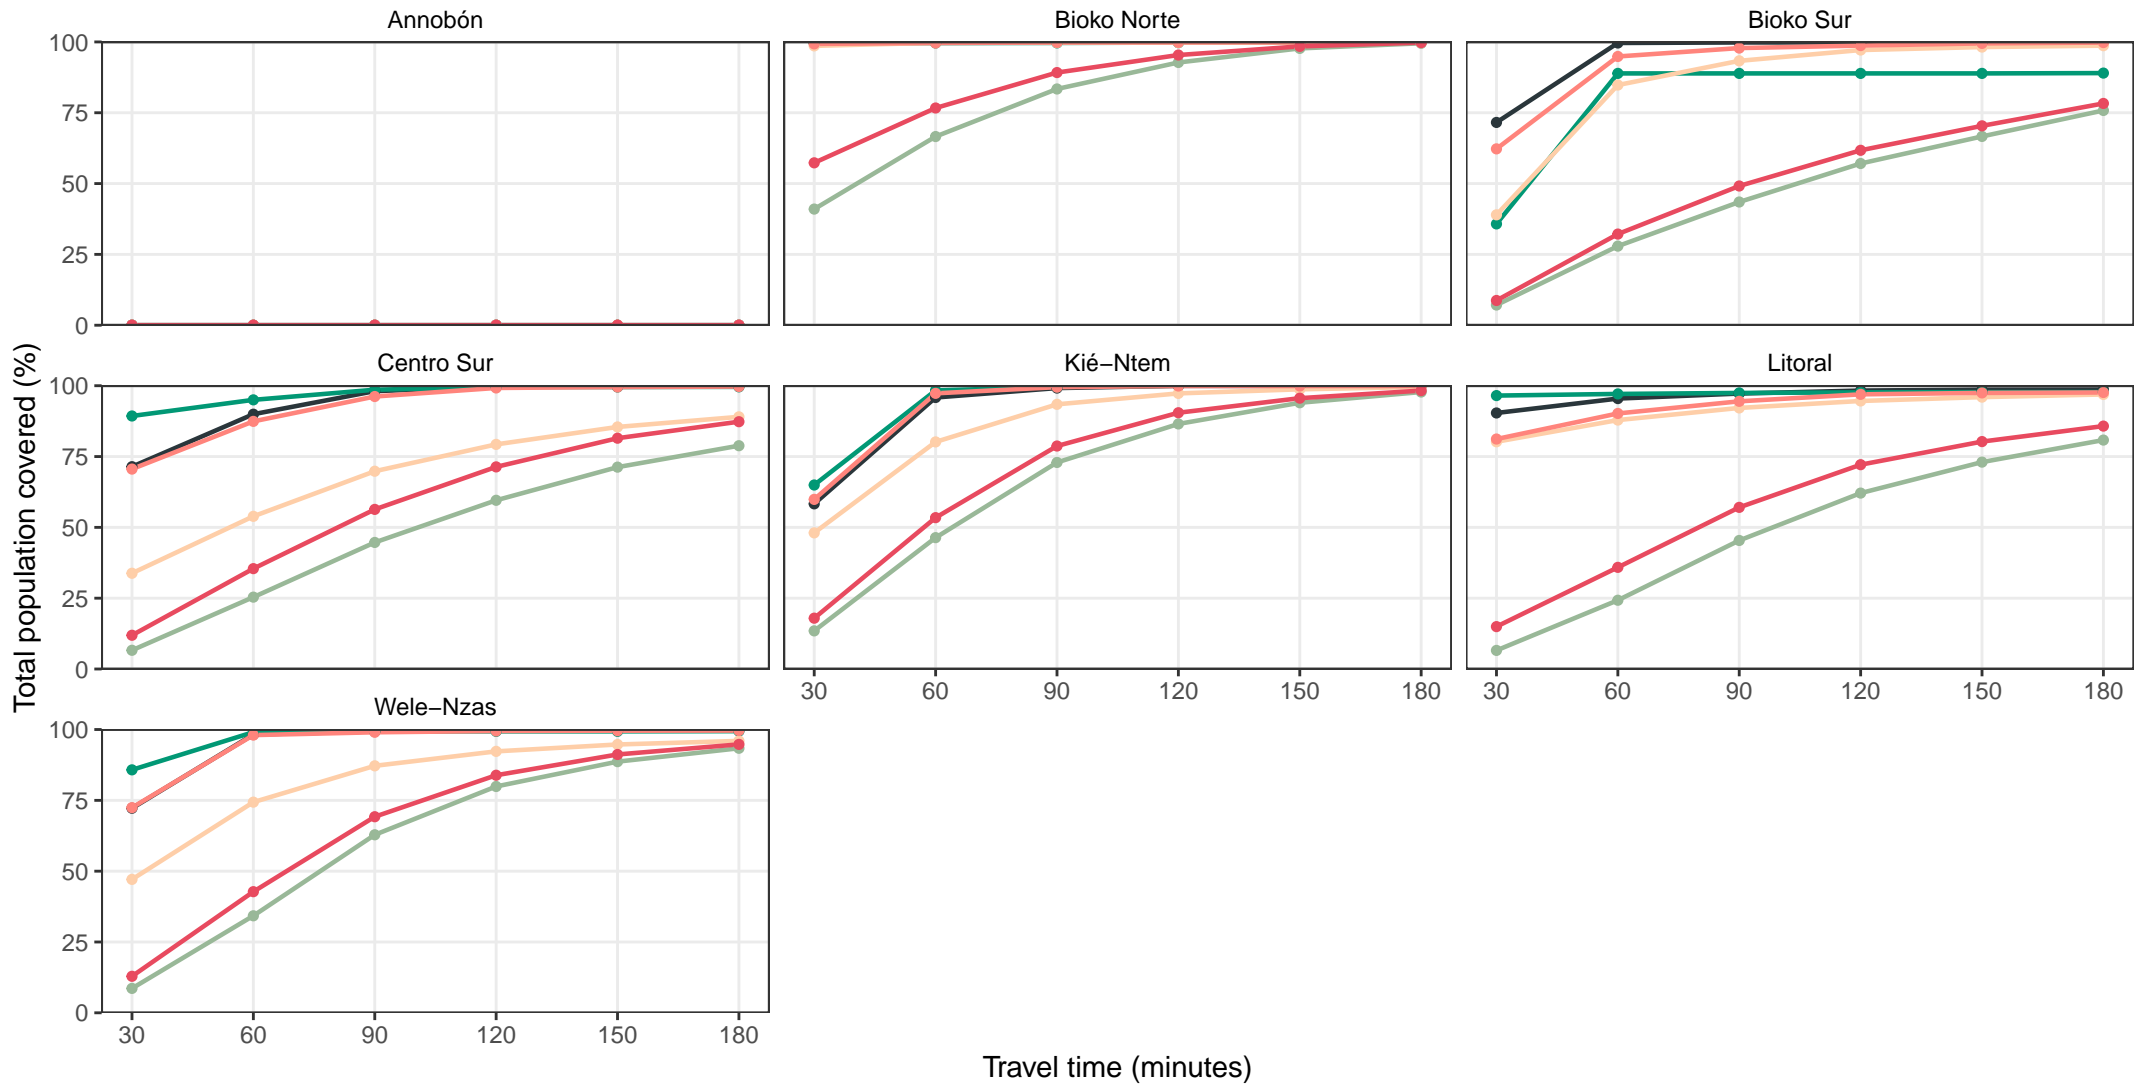

Supplementary Figure 23 – Accessibility coverage at 30, 60, 90, 120, and 150 minutes travel time at administrative level 1 for Equatorial Guinea.

# Kenya

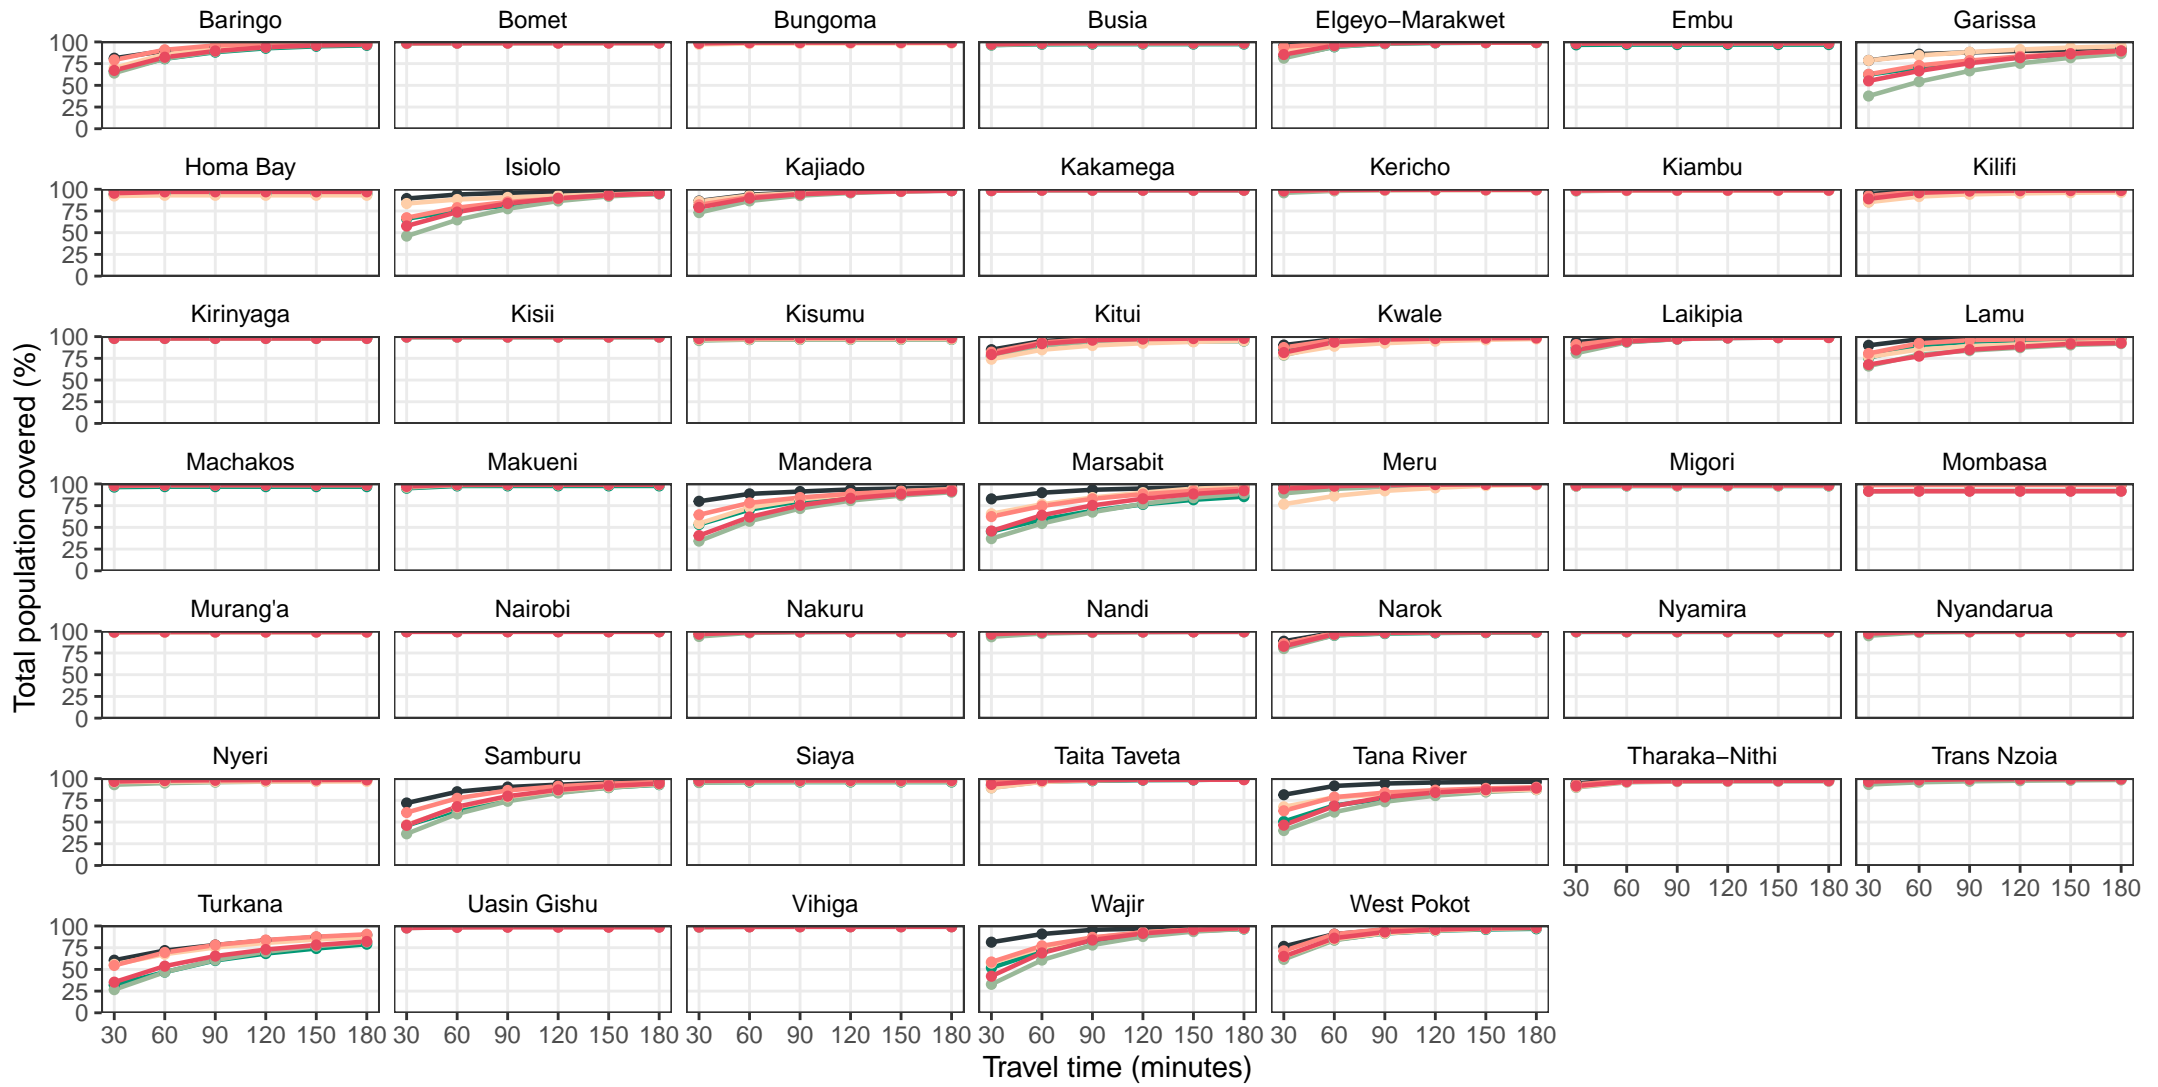

Supplementary Figure 24 – Accessibility coverage at 30, 60, 90, 120, and 150 minutes travel time at administrative level 1 for Kenya.

# Liberia

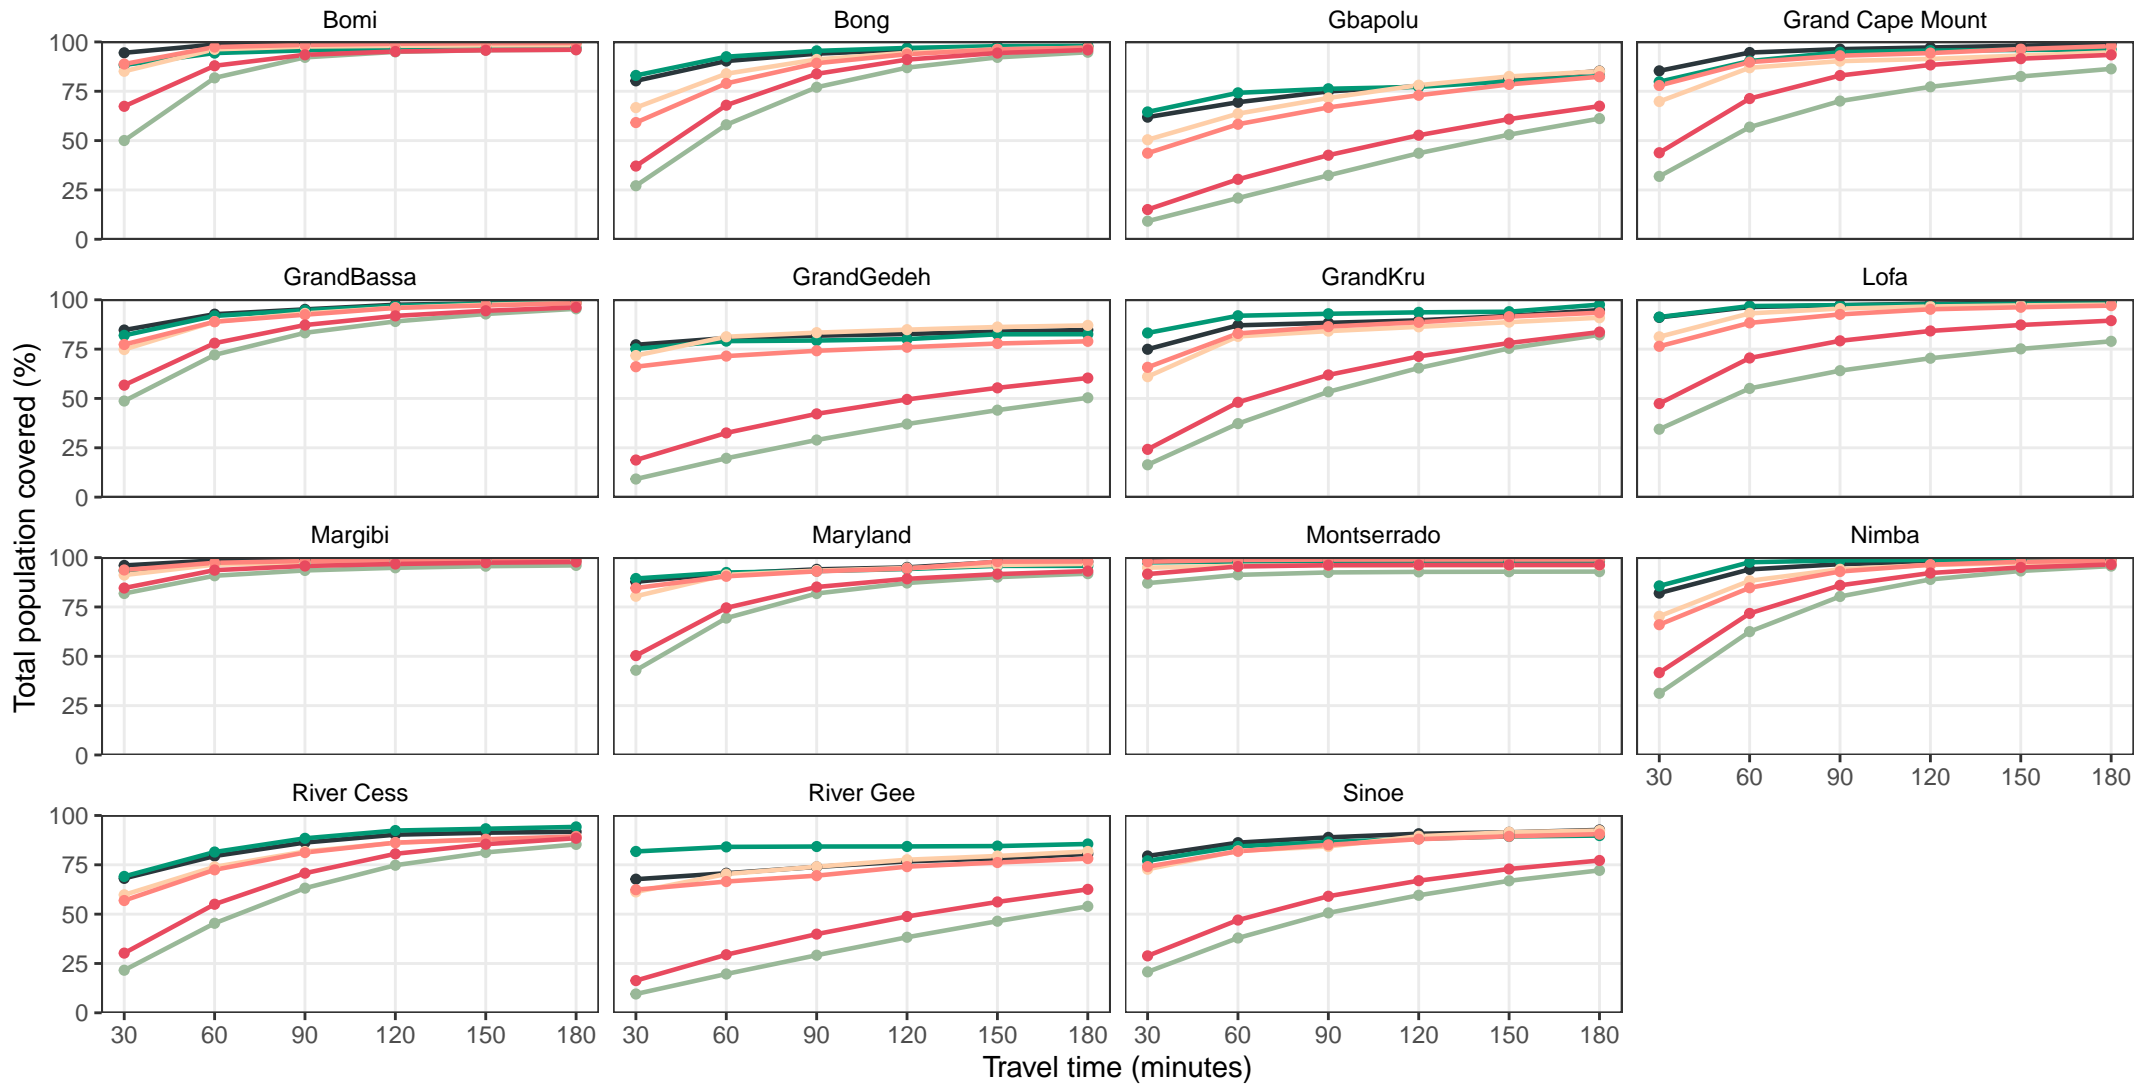

Supplementary Figure 25 – Accessibility coverage at 30, 60, 90, 120, and 150 minutes travel time at administrative level 1 for Liberia.

# Lesotho

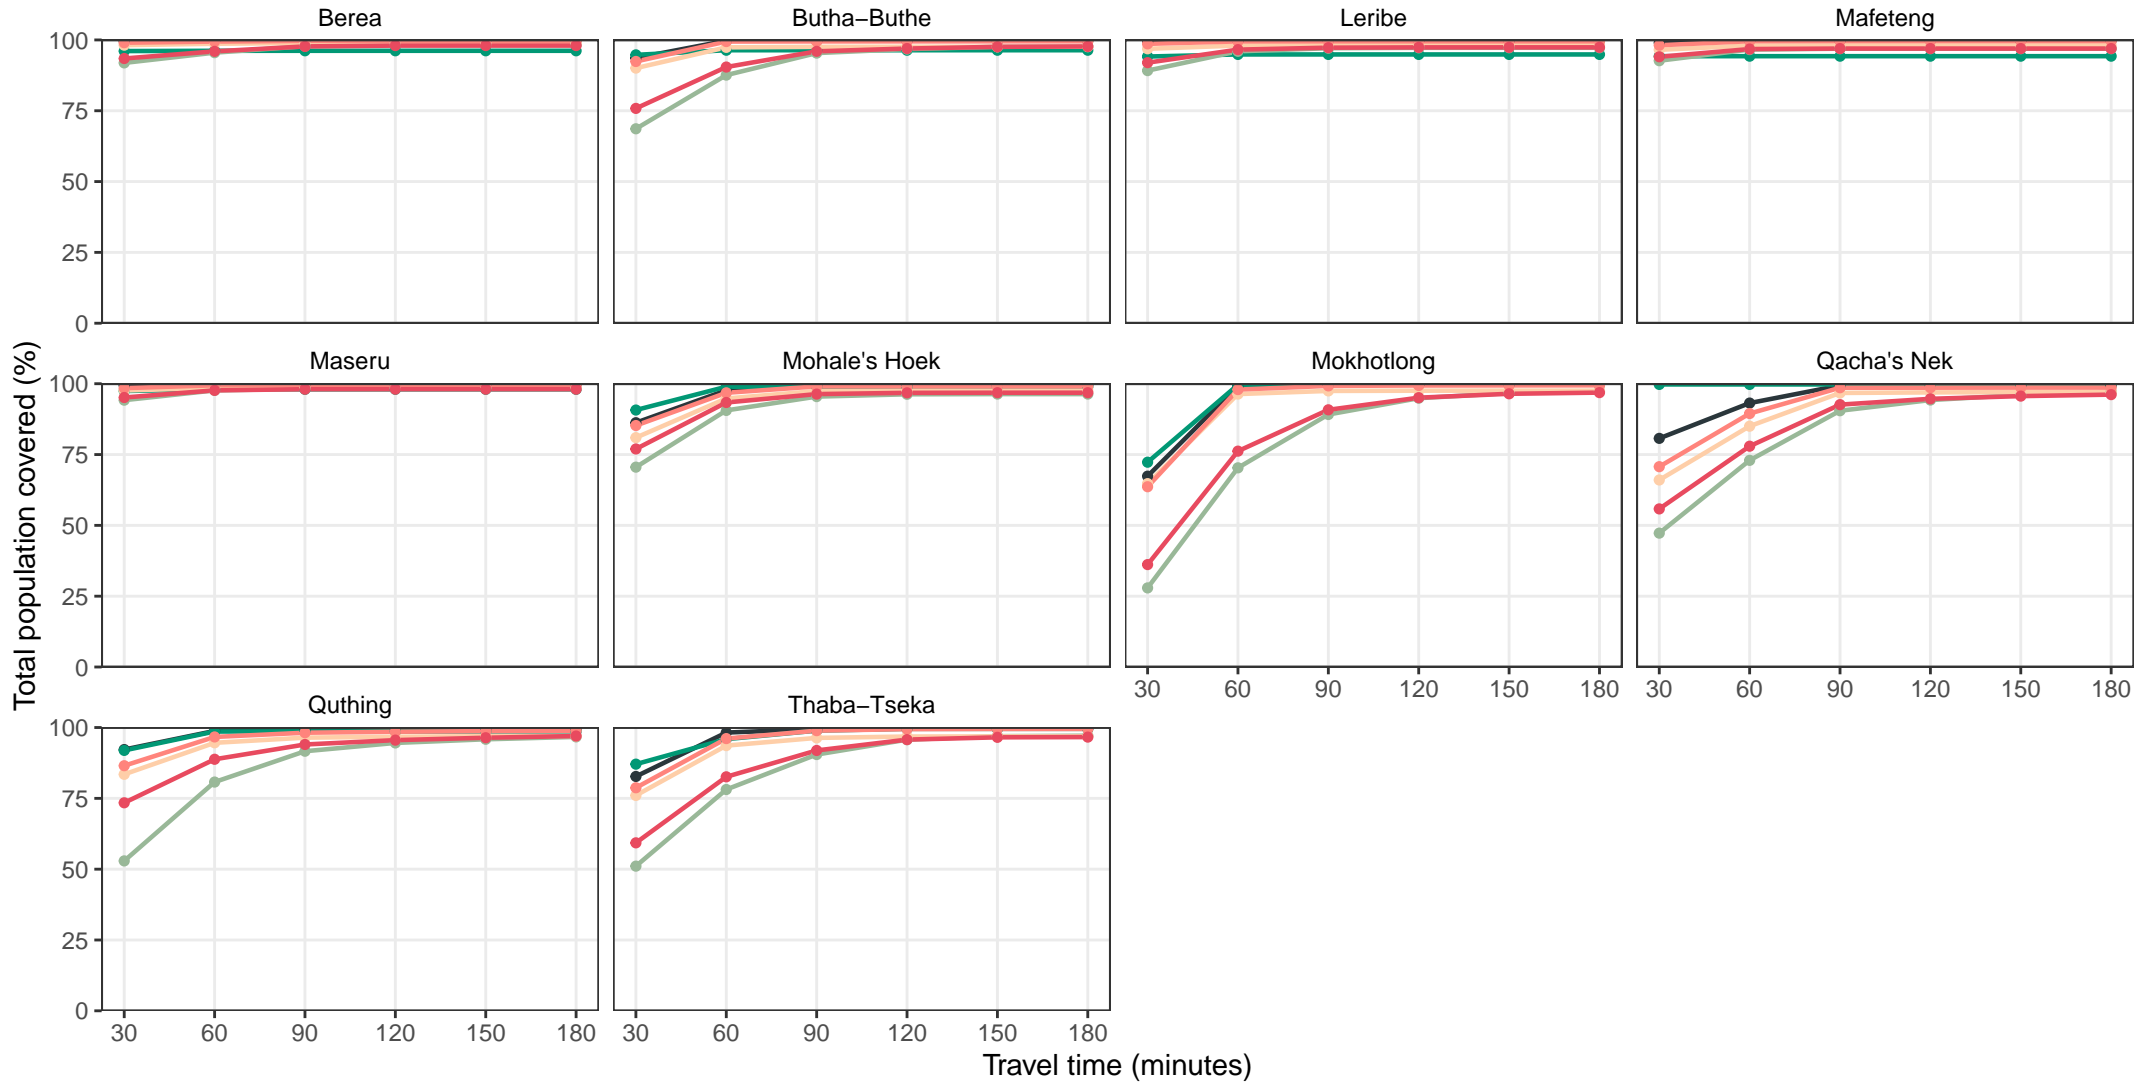

Supplementary Figure 26 – Accessibility coverage at 30, 60, 90, 120, and 150 minutes travel time at administrative level 1 for Lesotho.

# Madagascar

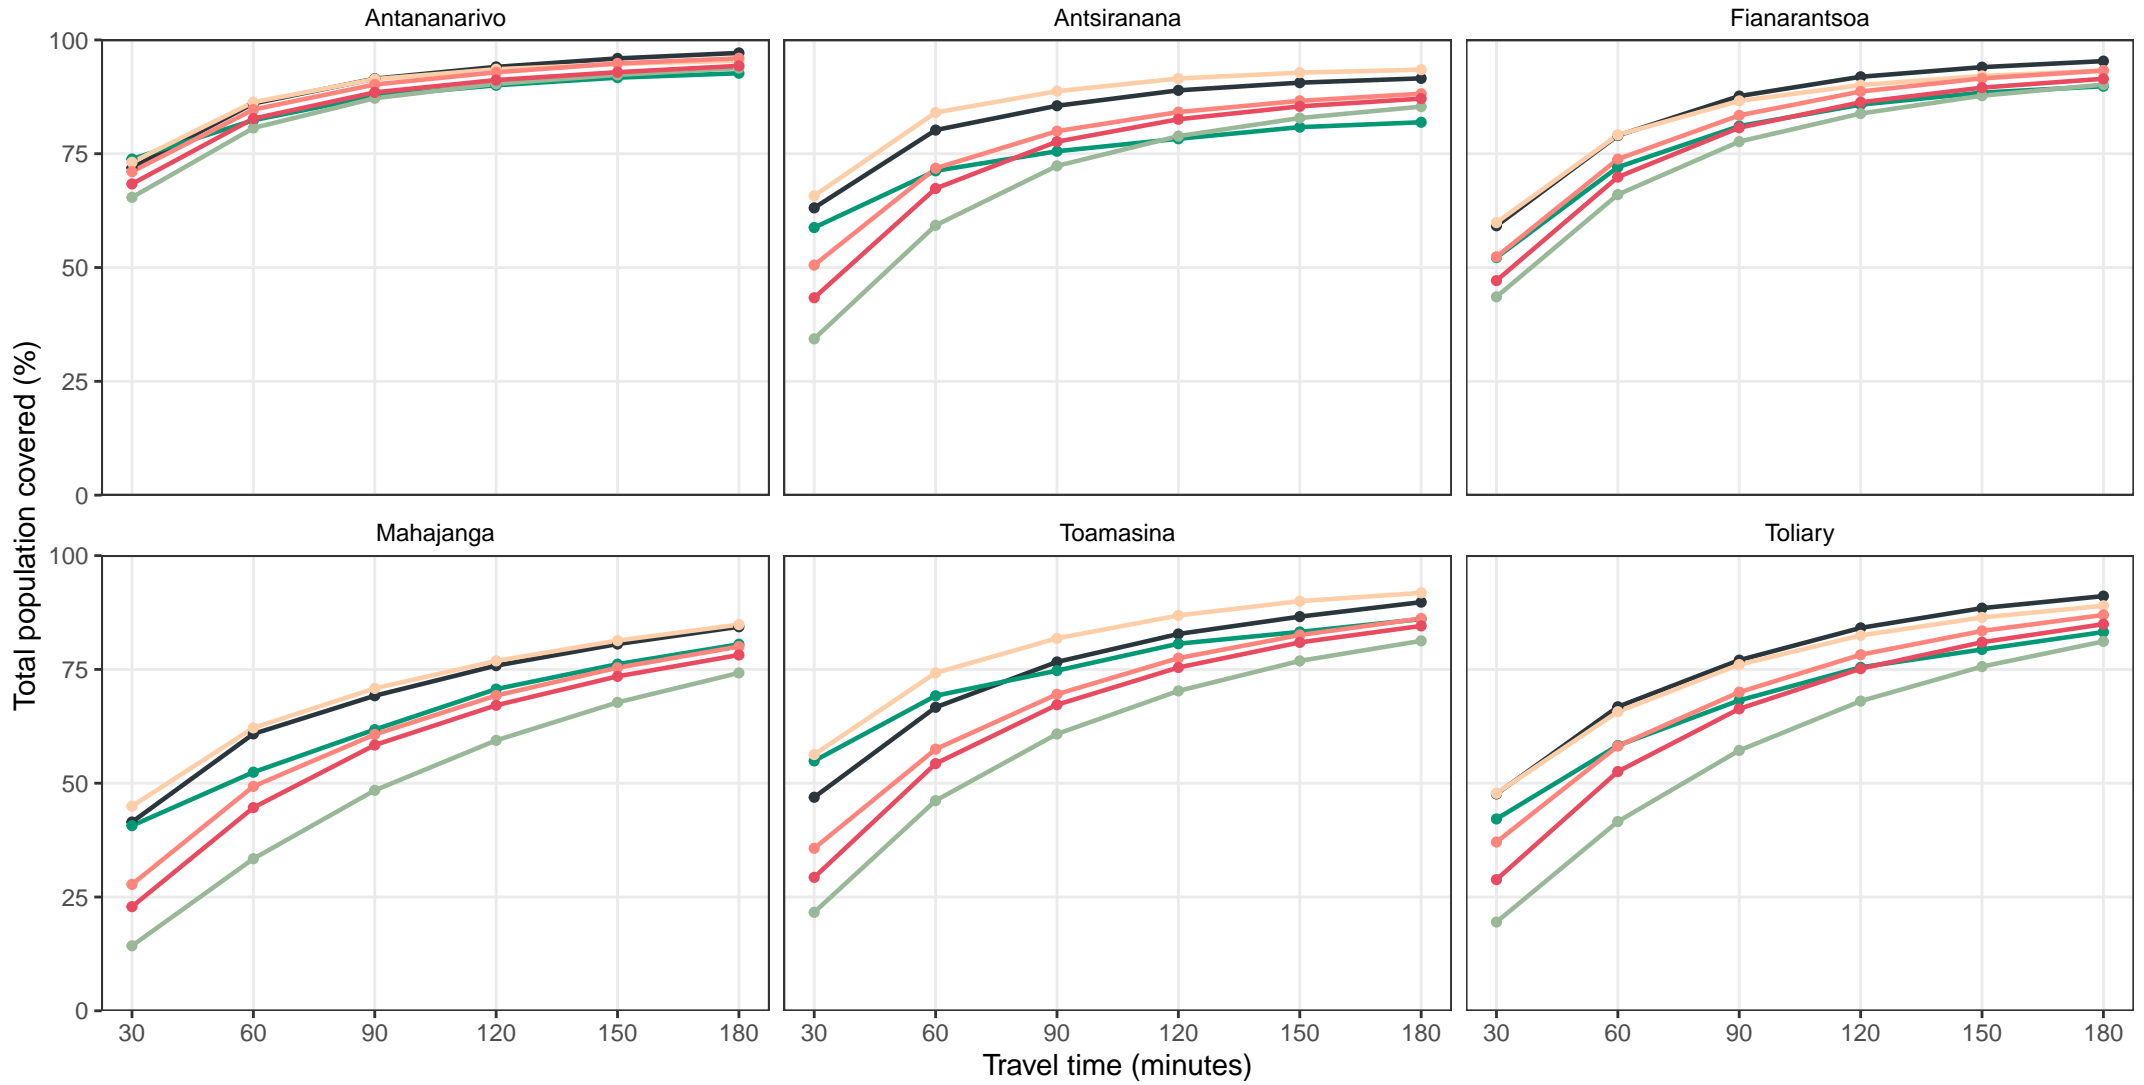

Supplementary Figure 27 – Accessibility coverage at 30, 60, 90, 120, and 150 minutes travel time at administrative level 1 for Madagascar.

# Mali

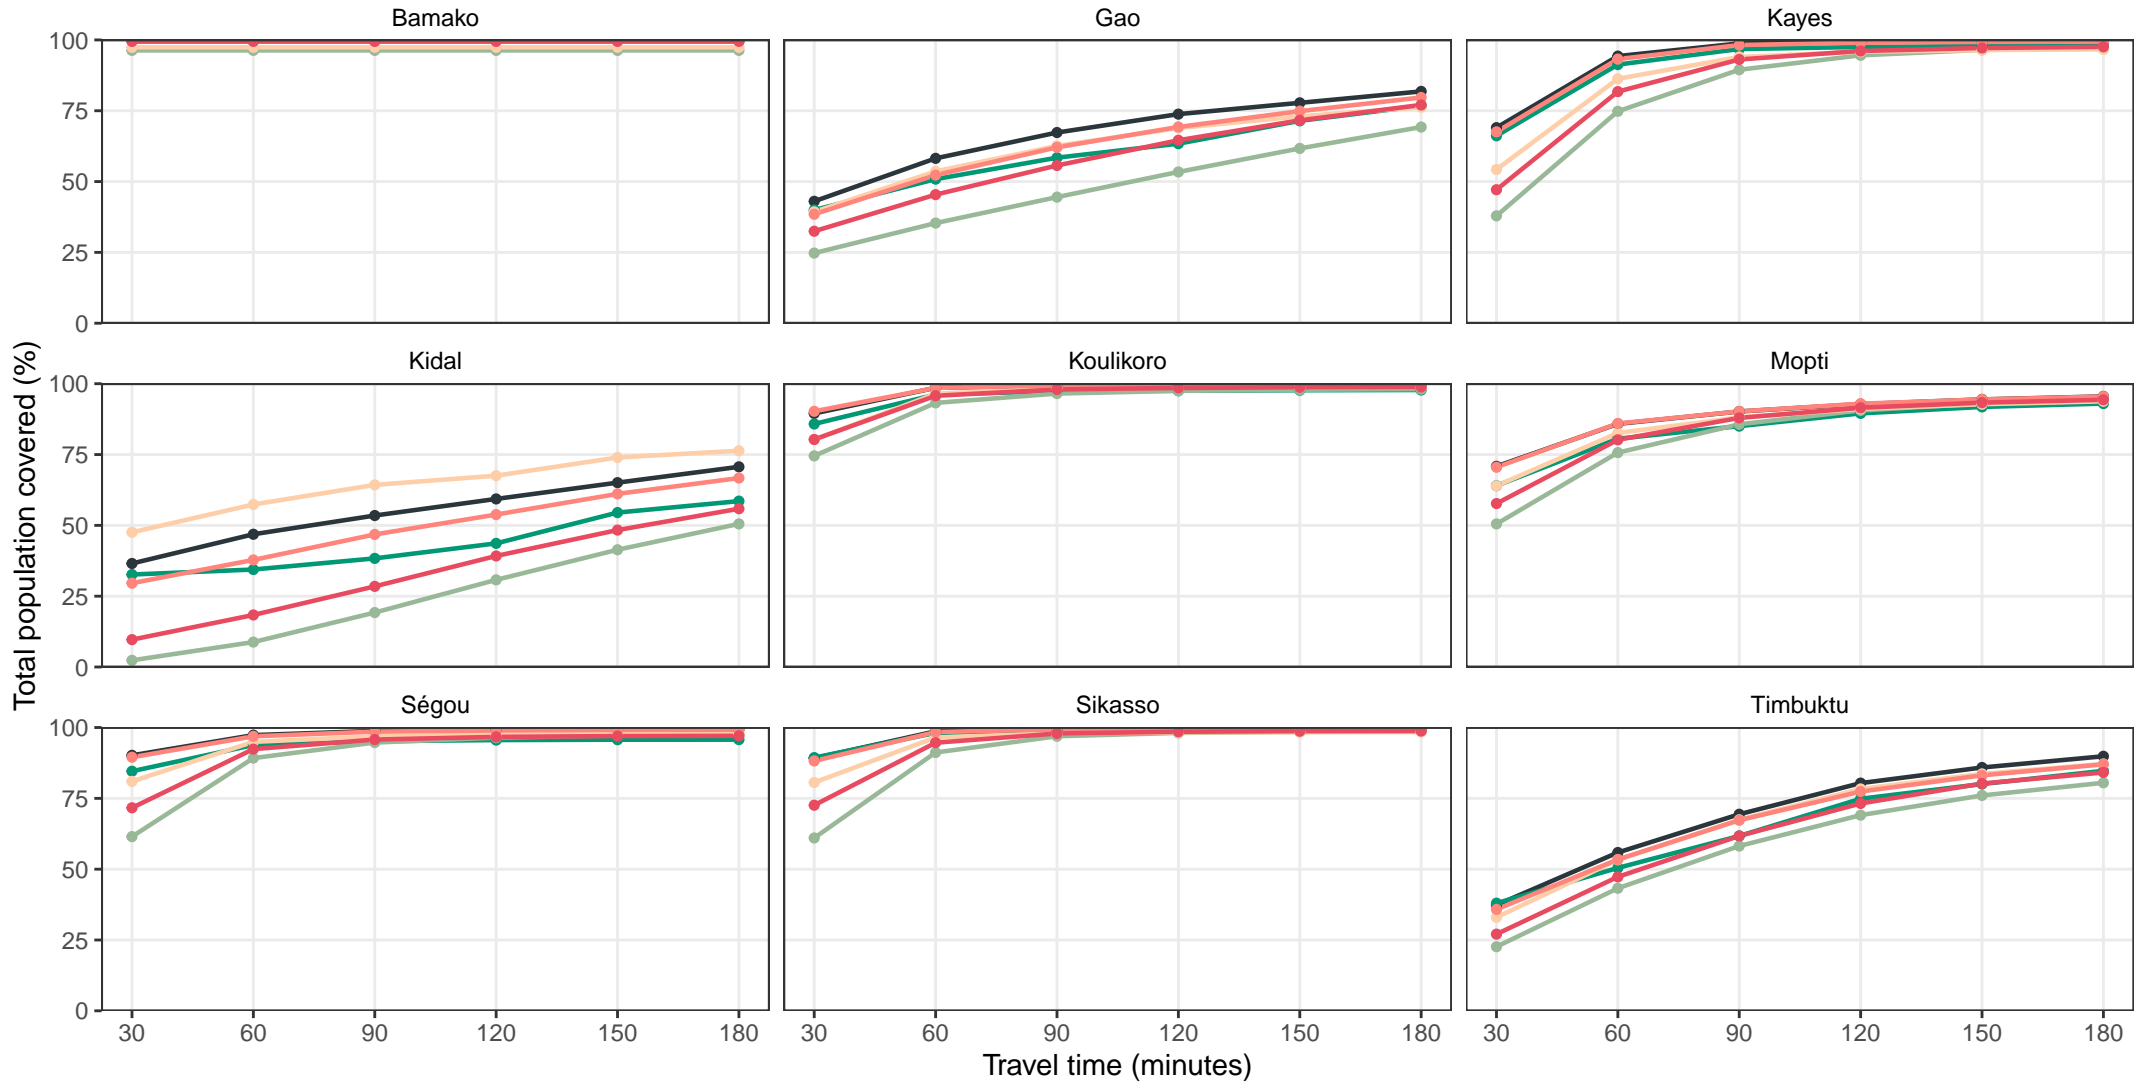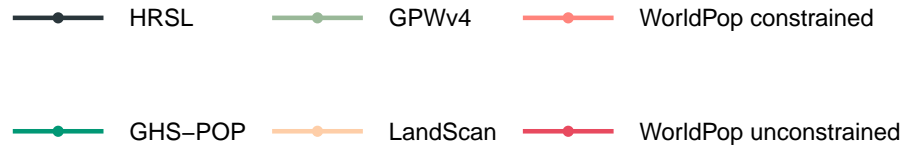

Supplementary Figure 28 – Accessibility coverage at 30, 60, 90, 120, and 150 minutes travel time at administrative level 1 for Mali.



# Mozambique

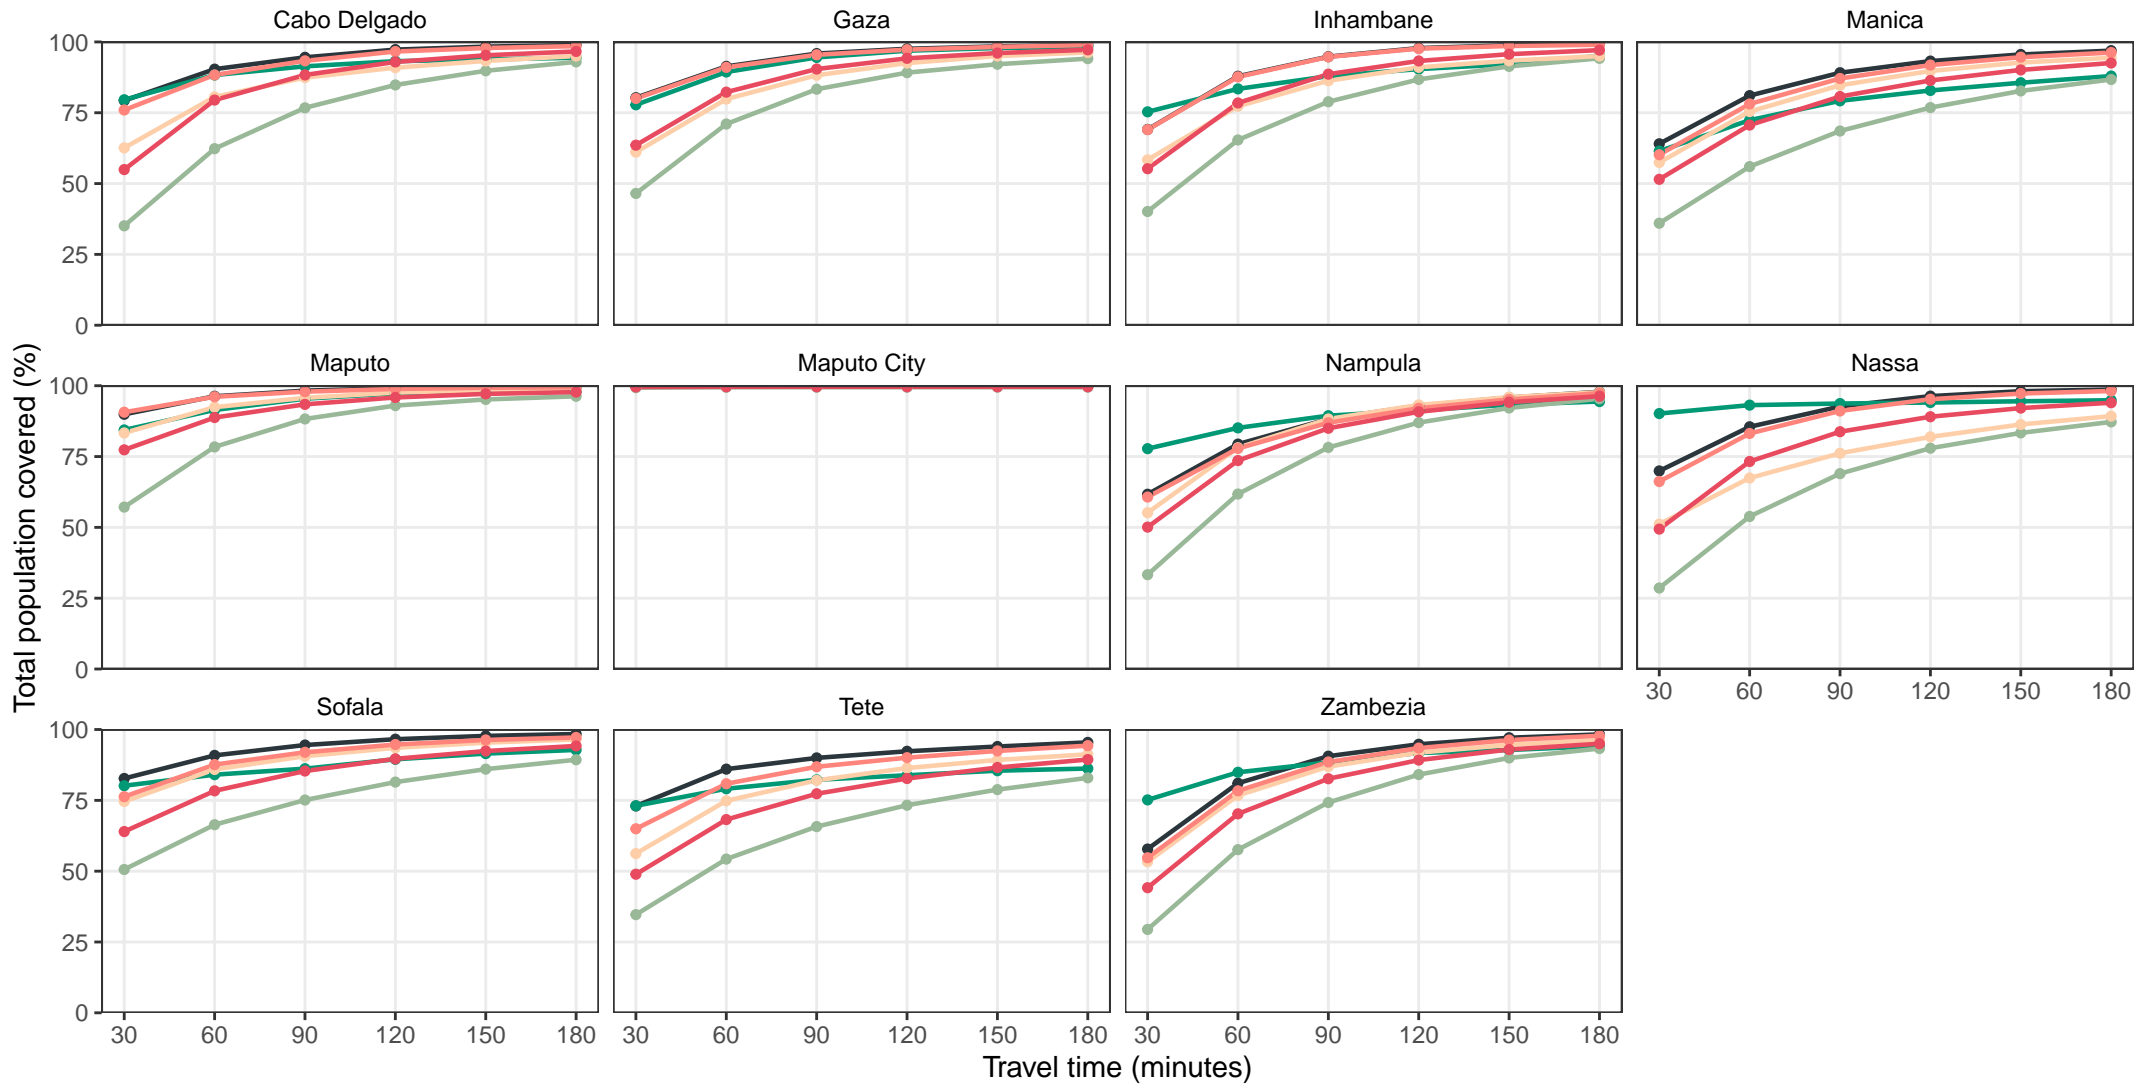

Supplementary Figure 29 – Accessibility coverage at 30, 60, 90, 120, and 150 minutes travel time at administrative level 1 for Mozambique.

# Mauritania

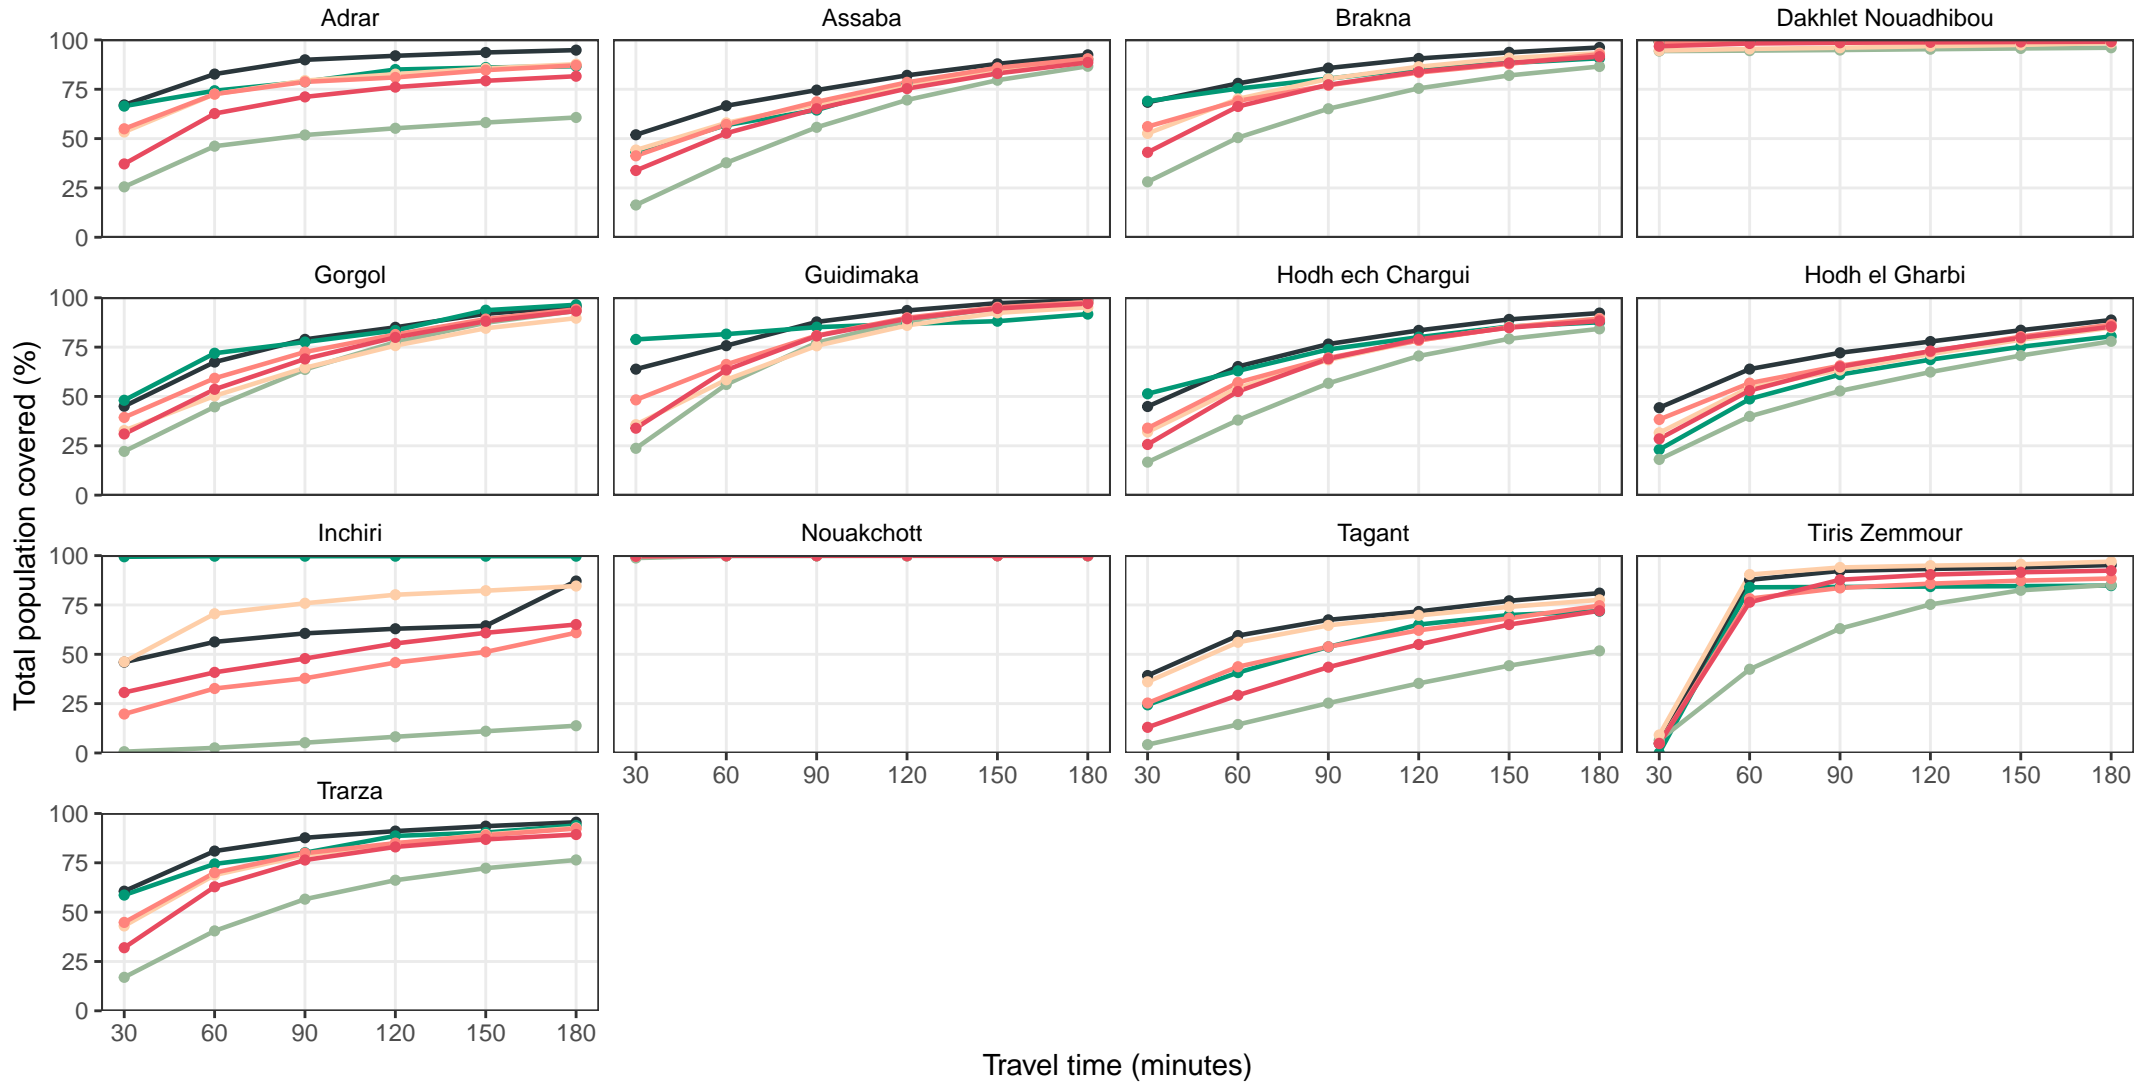

Supplementary Figure 30 – Accessibility coverage at 30, 60, 90, 120, and 150 minutes travel time at administrative level 1 for Mauritania.

# Mauritius

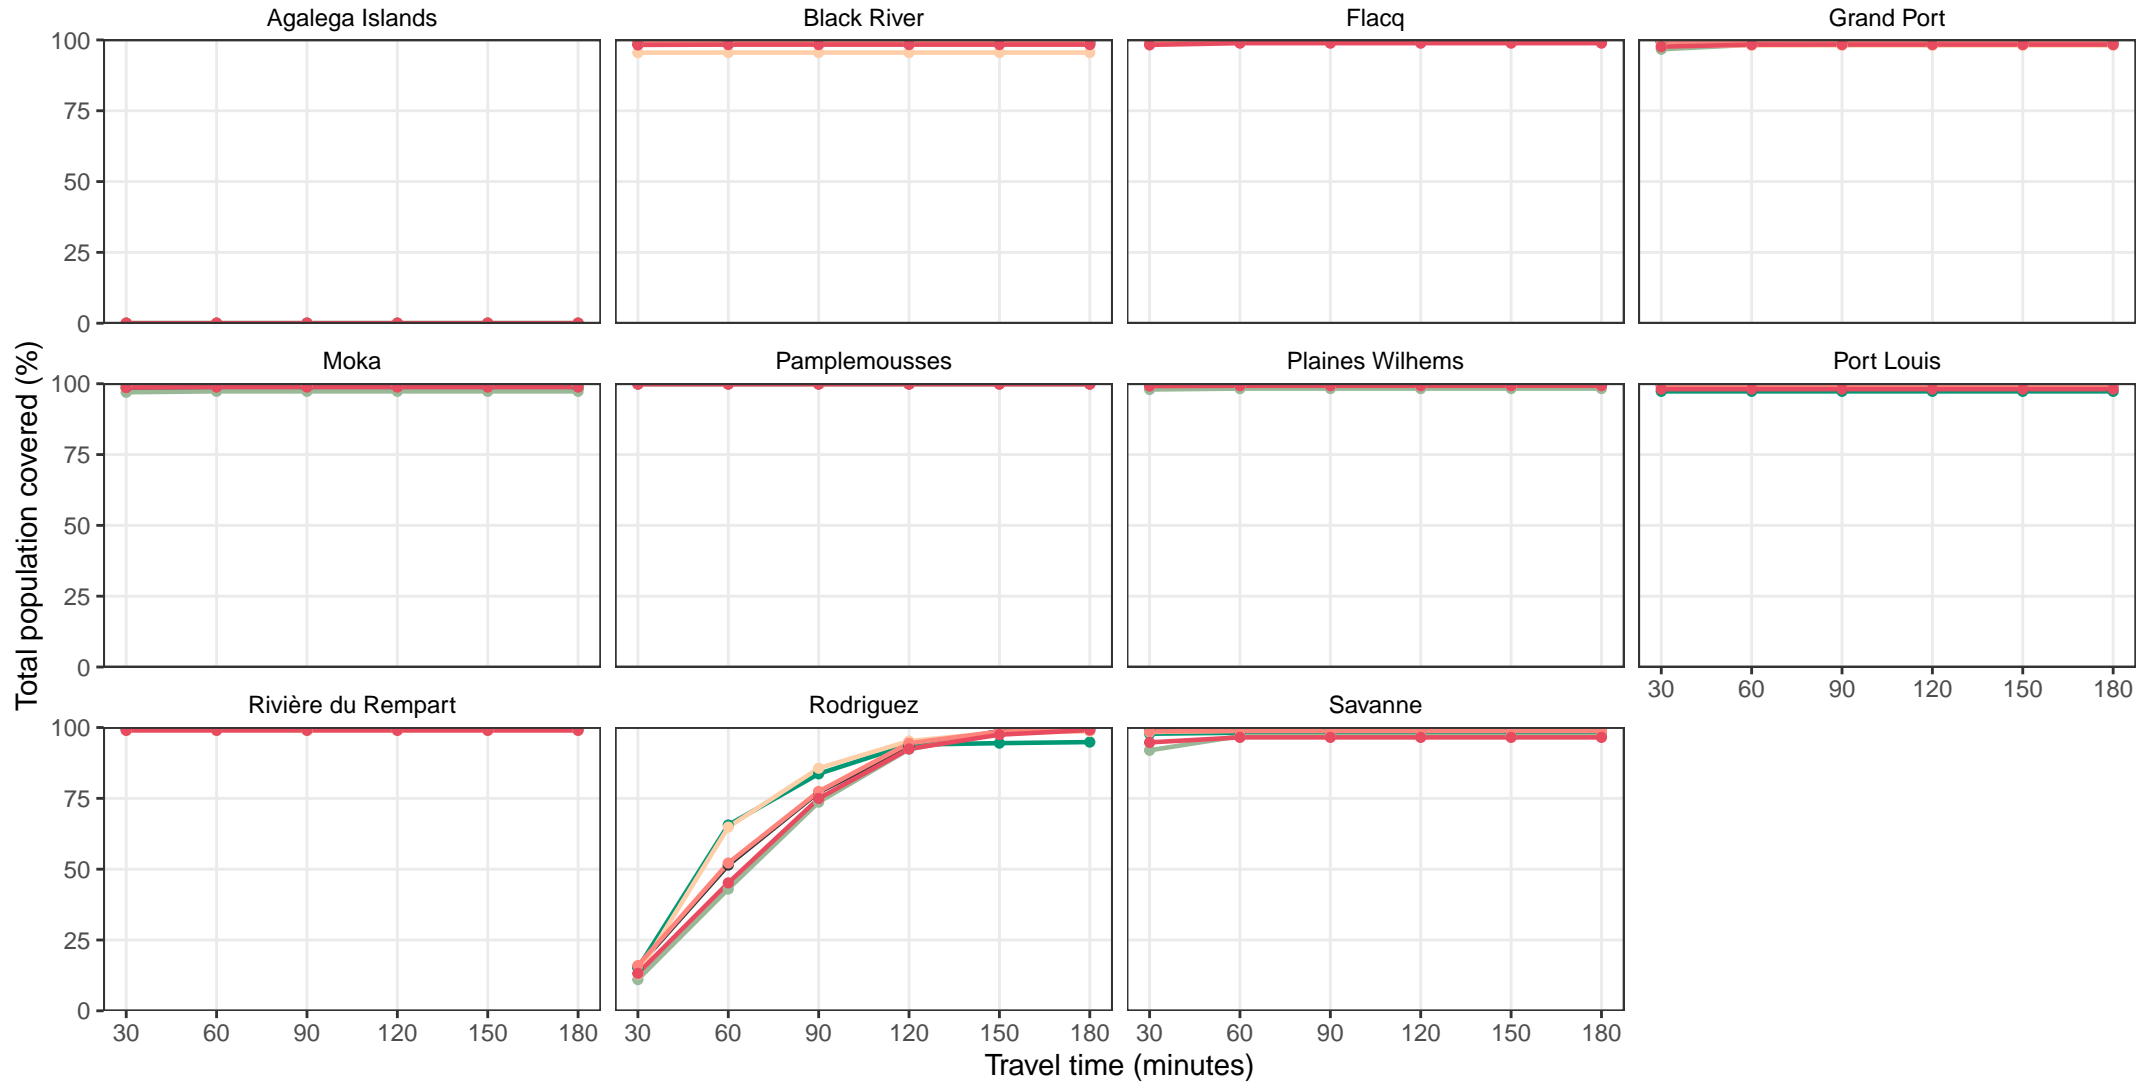

Supplementary Figure 31 – Accessibility coverage at 30, 60, 90, 120, and 150 minutes travel time at administrative level 1 for Mauritius.

# Malawi

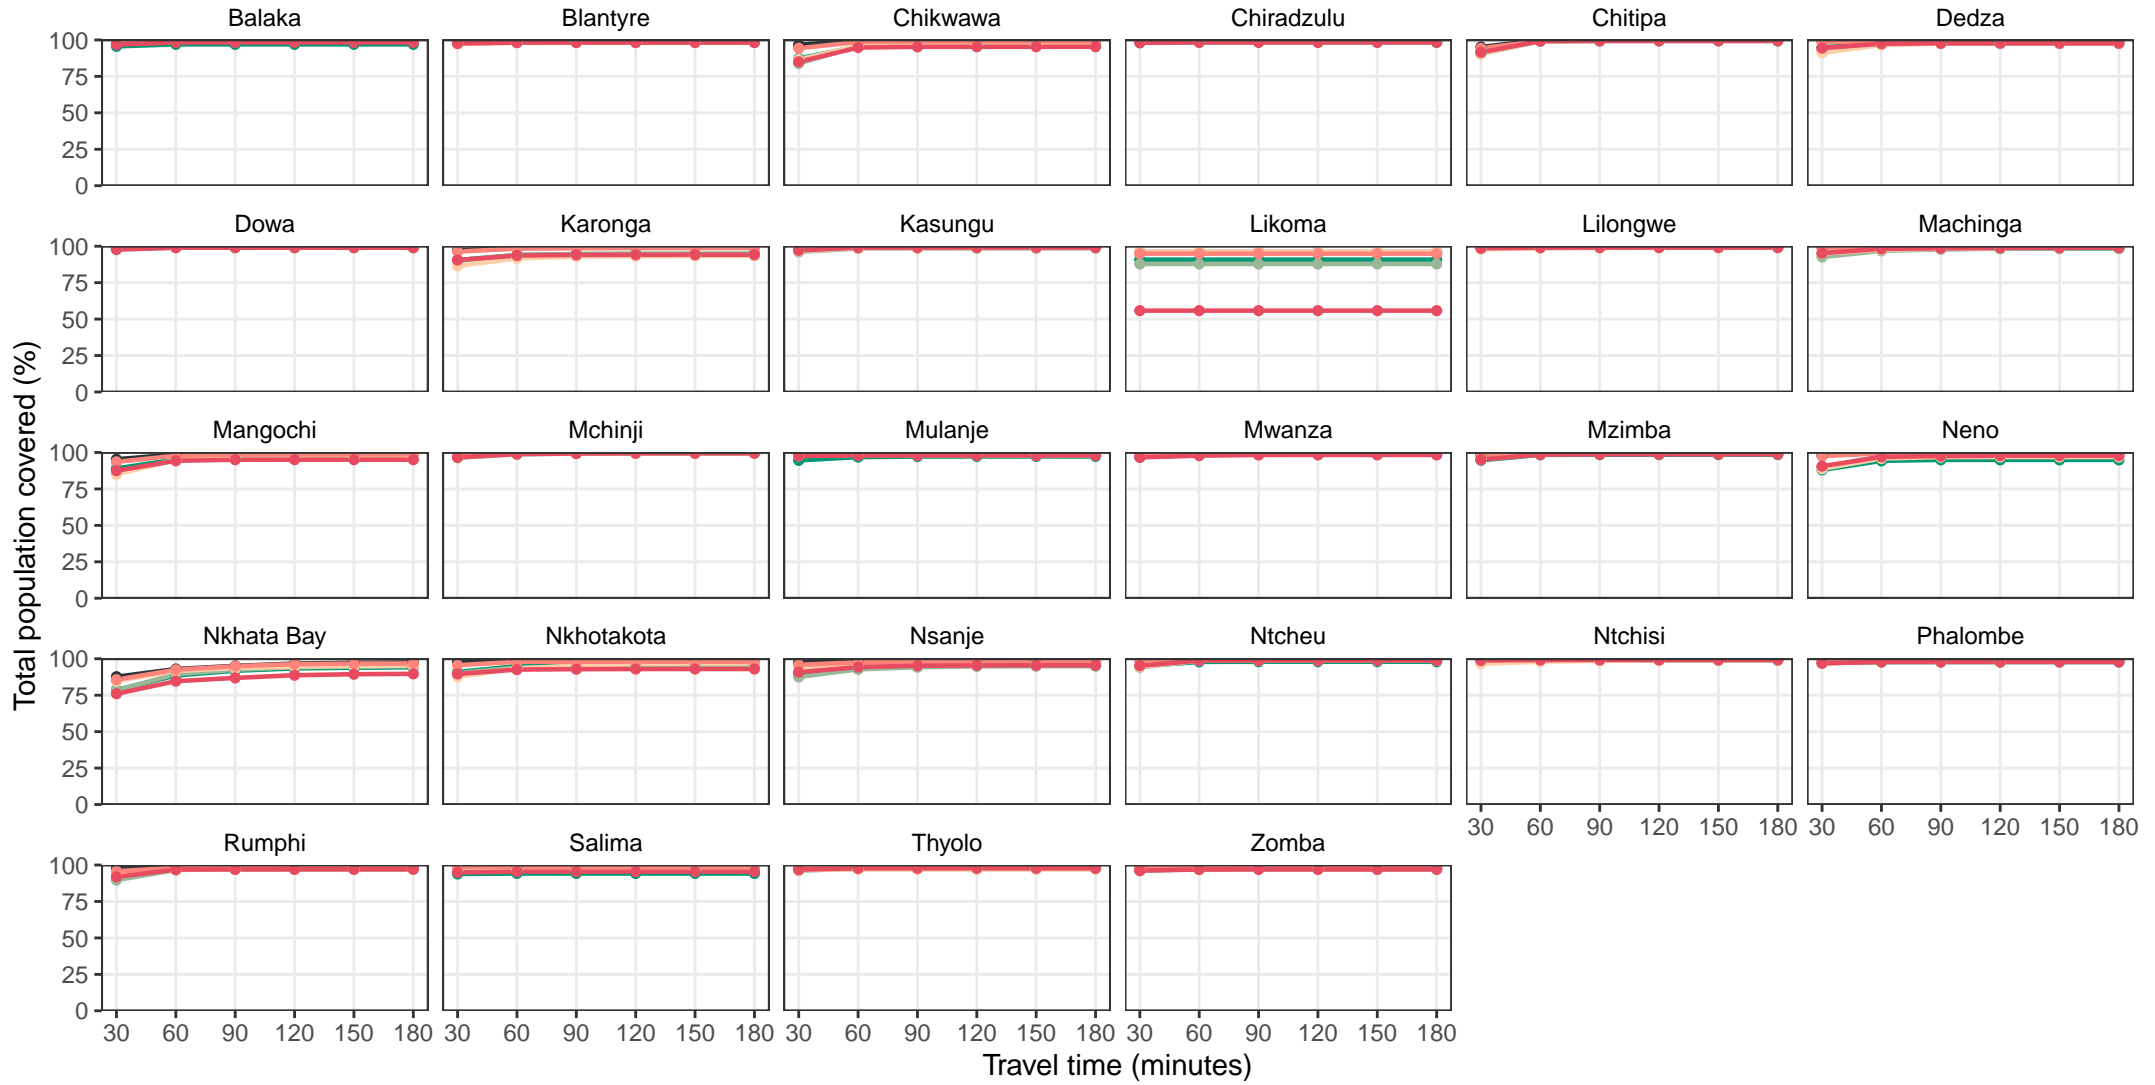

Supplementary Figure 32 – Accessibility coverage at 30, 60, 90, 120, and 150 minutes travel time at administrative level 1 for Malawi.

# Namibia

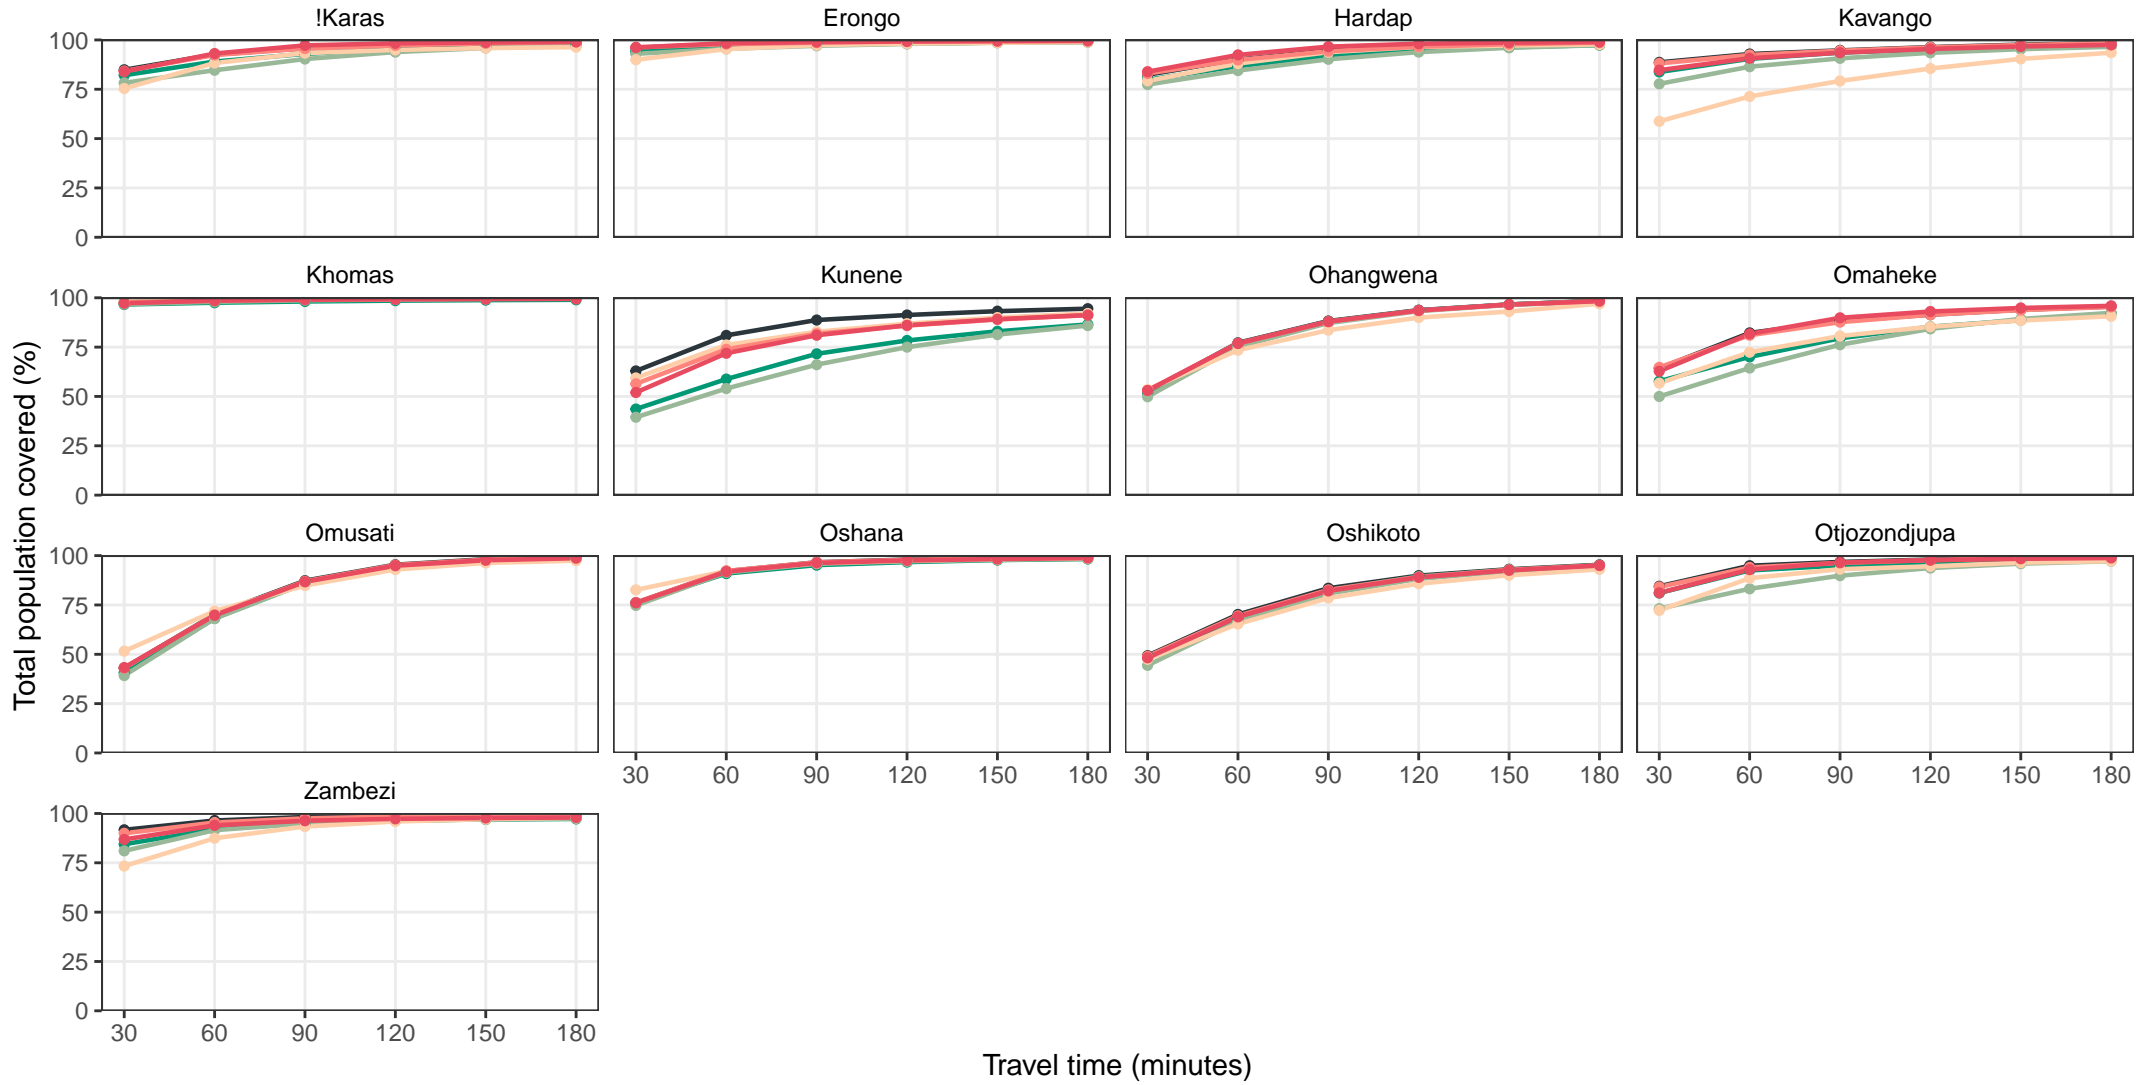

Supplementary Figure 33 – Accessibility coverage at 30, 60, 90, 120, and 150 minutes travel time at administrative level 1 for Namibia.

# Niger

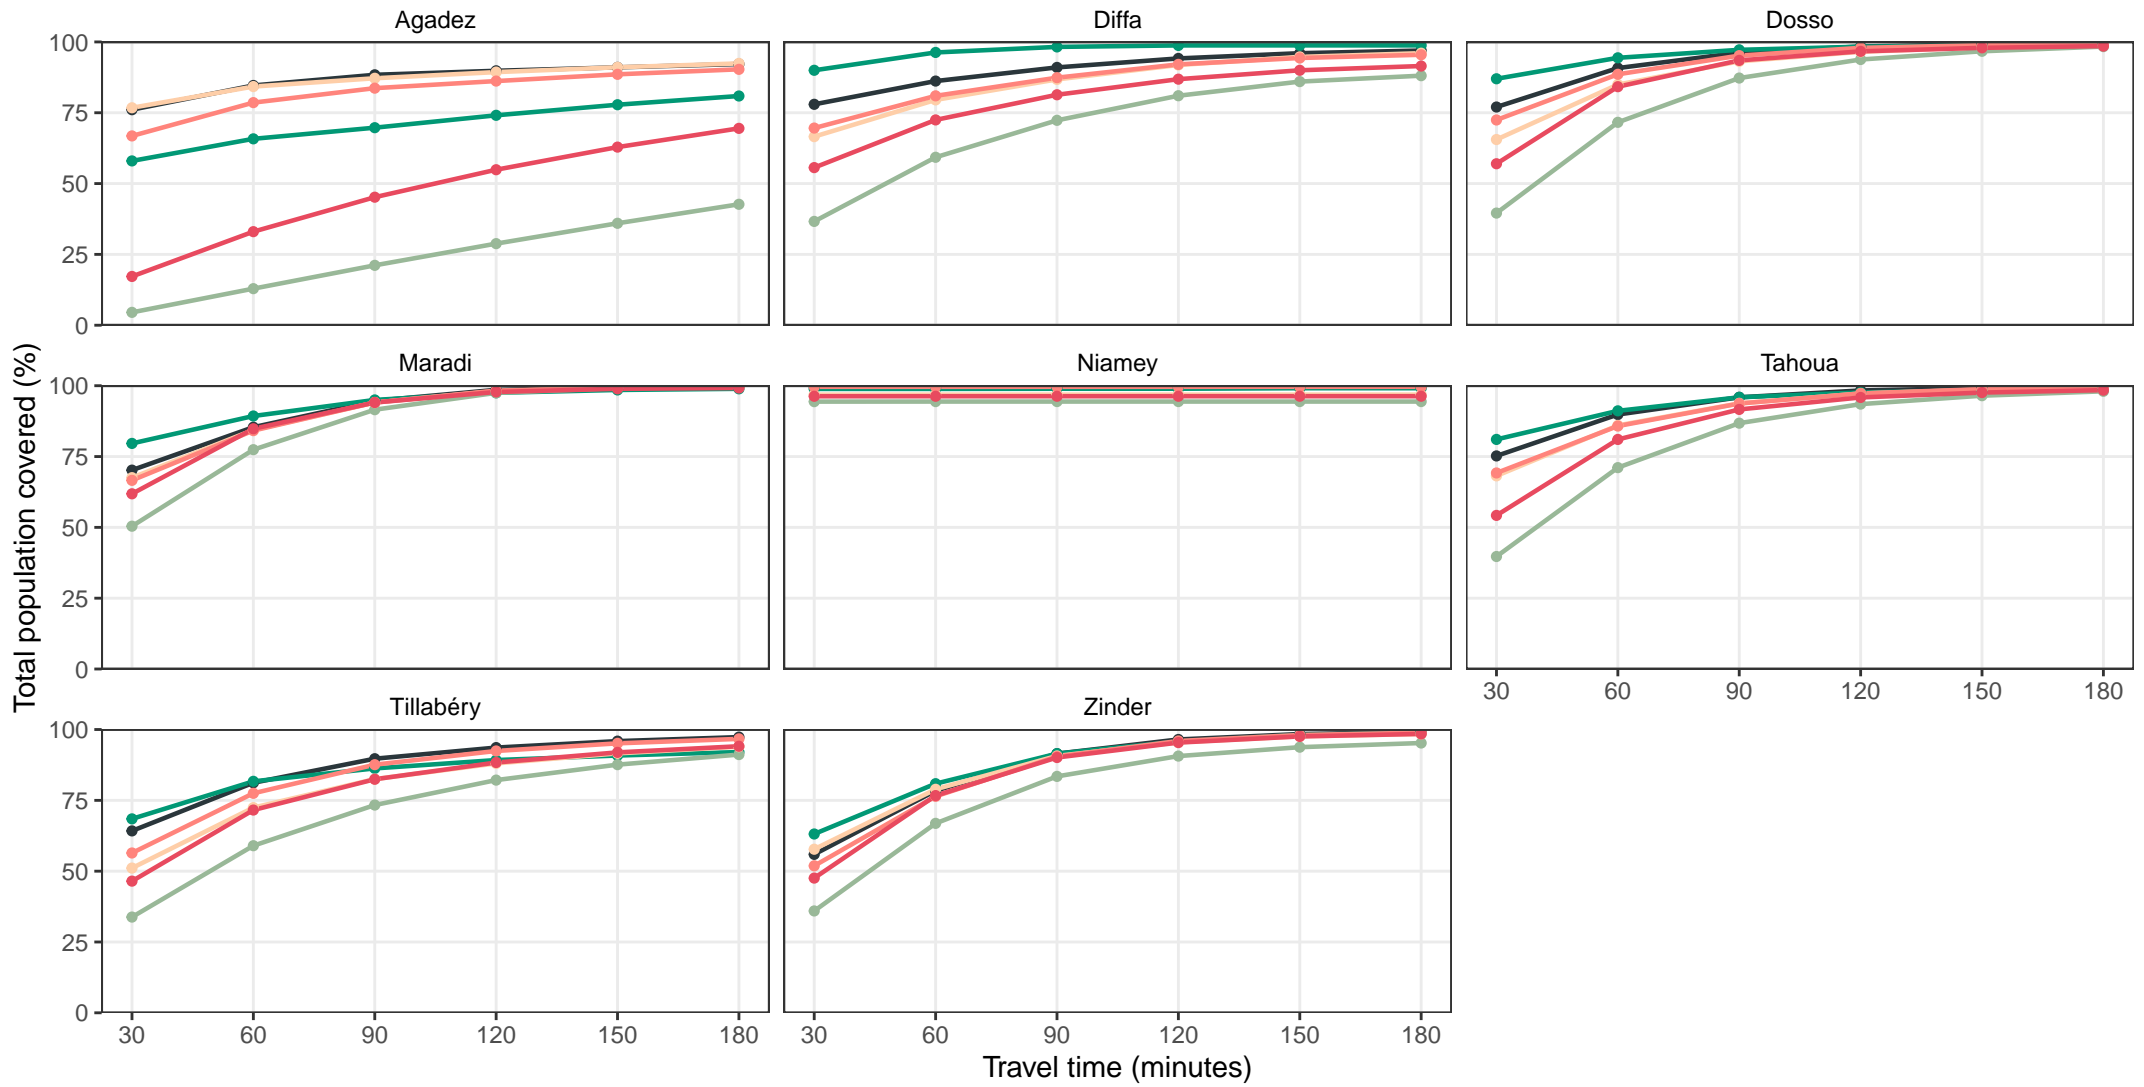

Supplementary Figure 34 – Accessibility coverage at 30, 60, 90, 120, and 150 minutes travel time at administrative level 1 for Niger.

# Nigeria

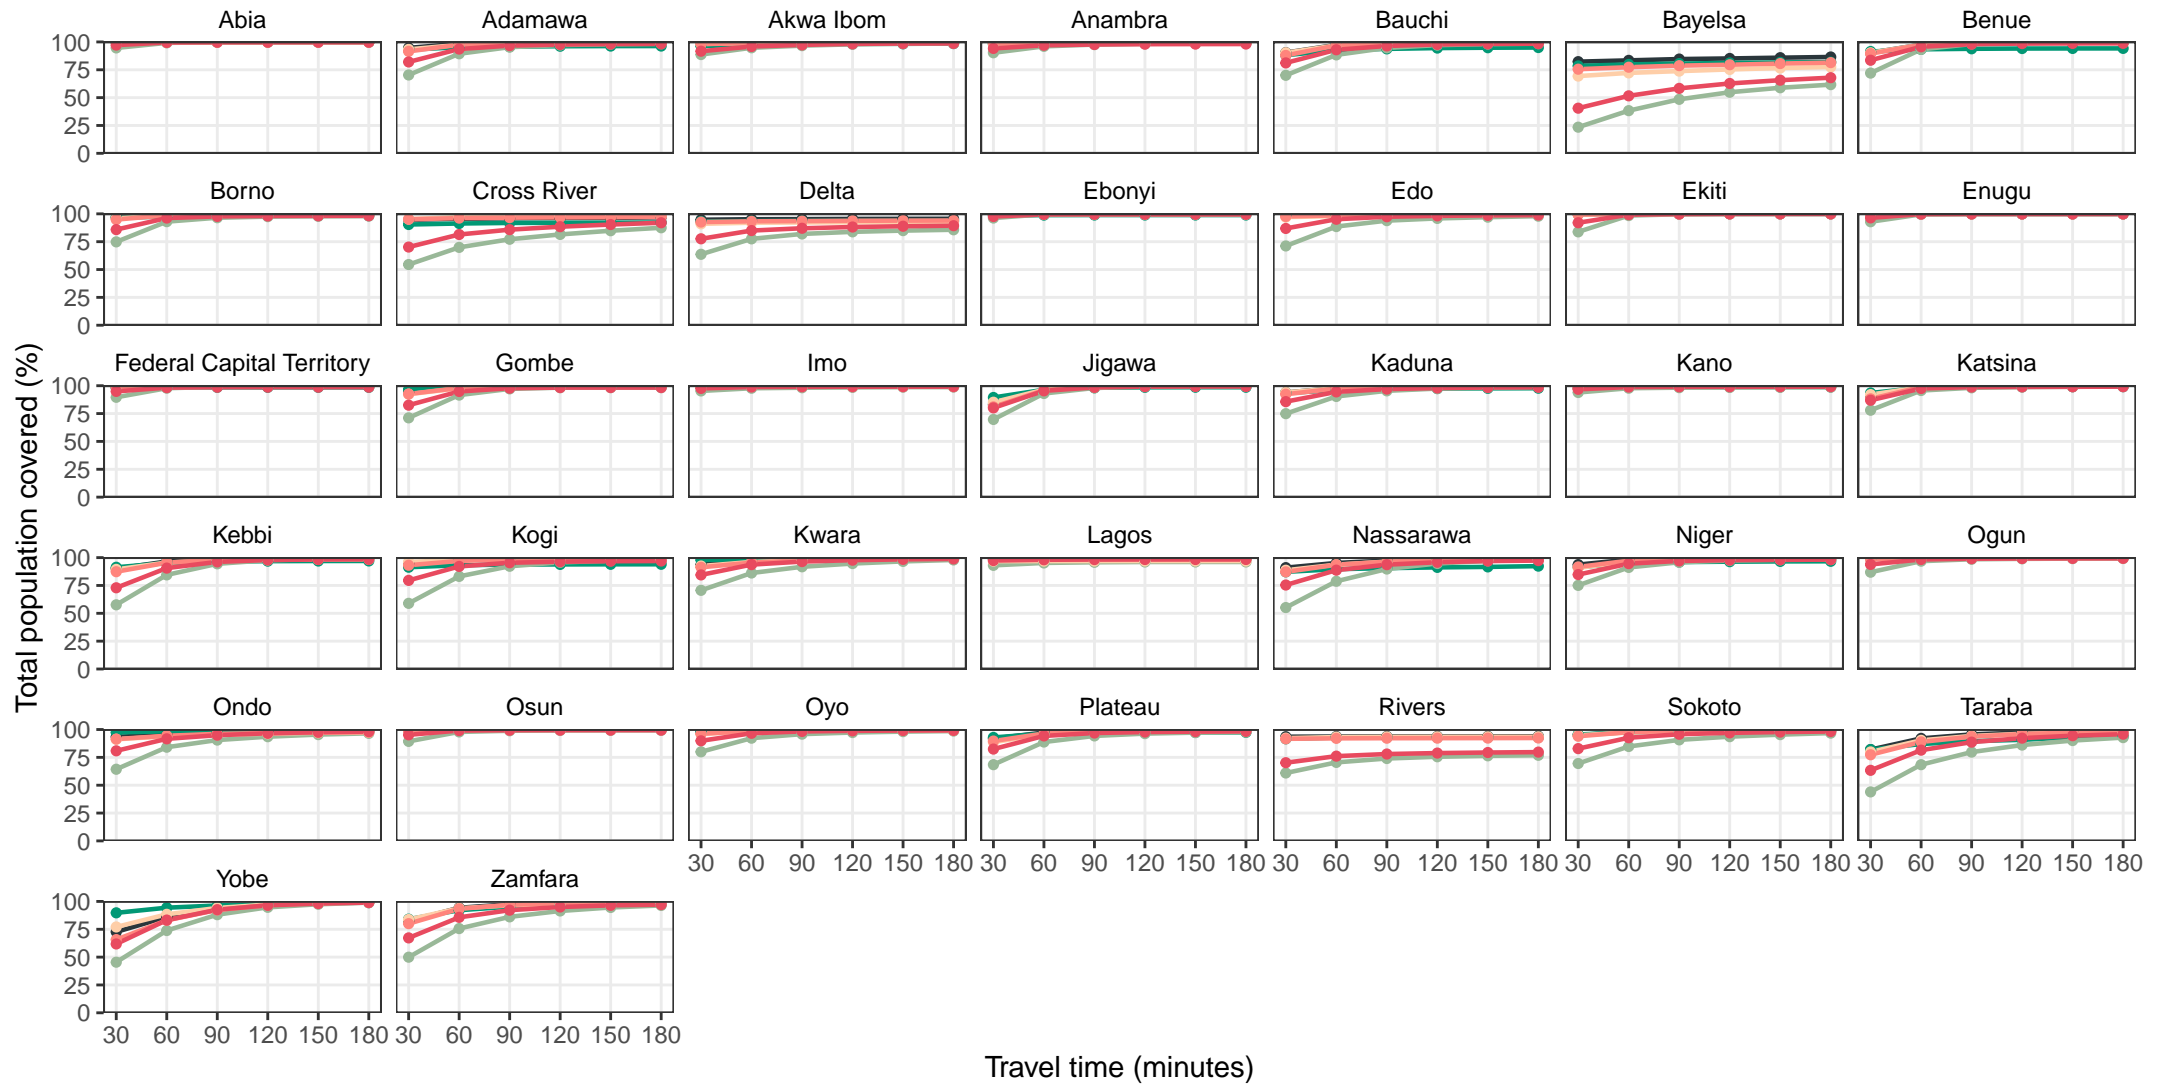

Supplementary Figure 35 – Accessibility coverage at 30, 60, 90, 120, and 150 minutes travel time at administrative level 1 for Nigeria.

# Rwanda

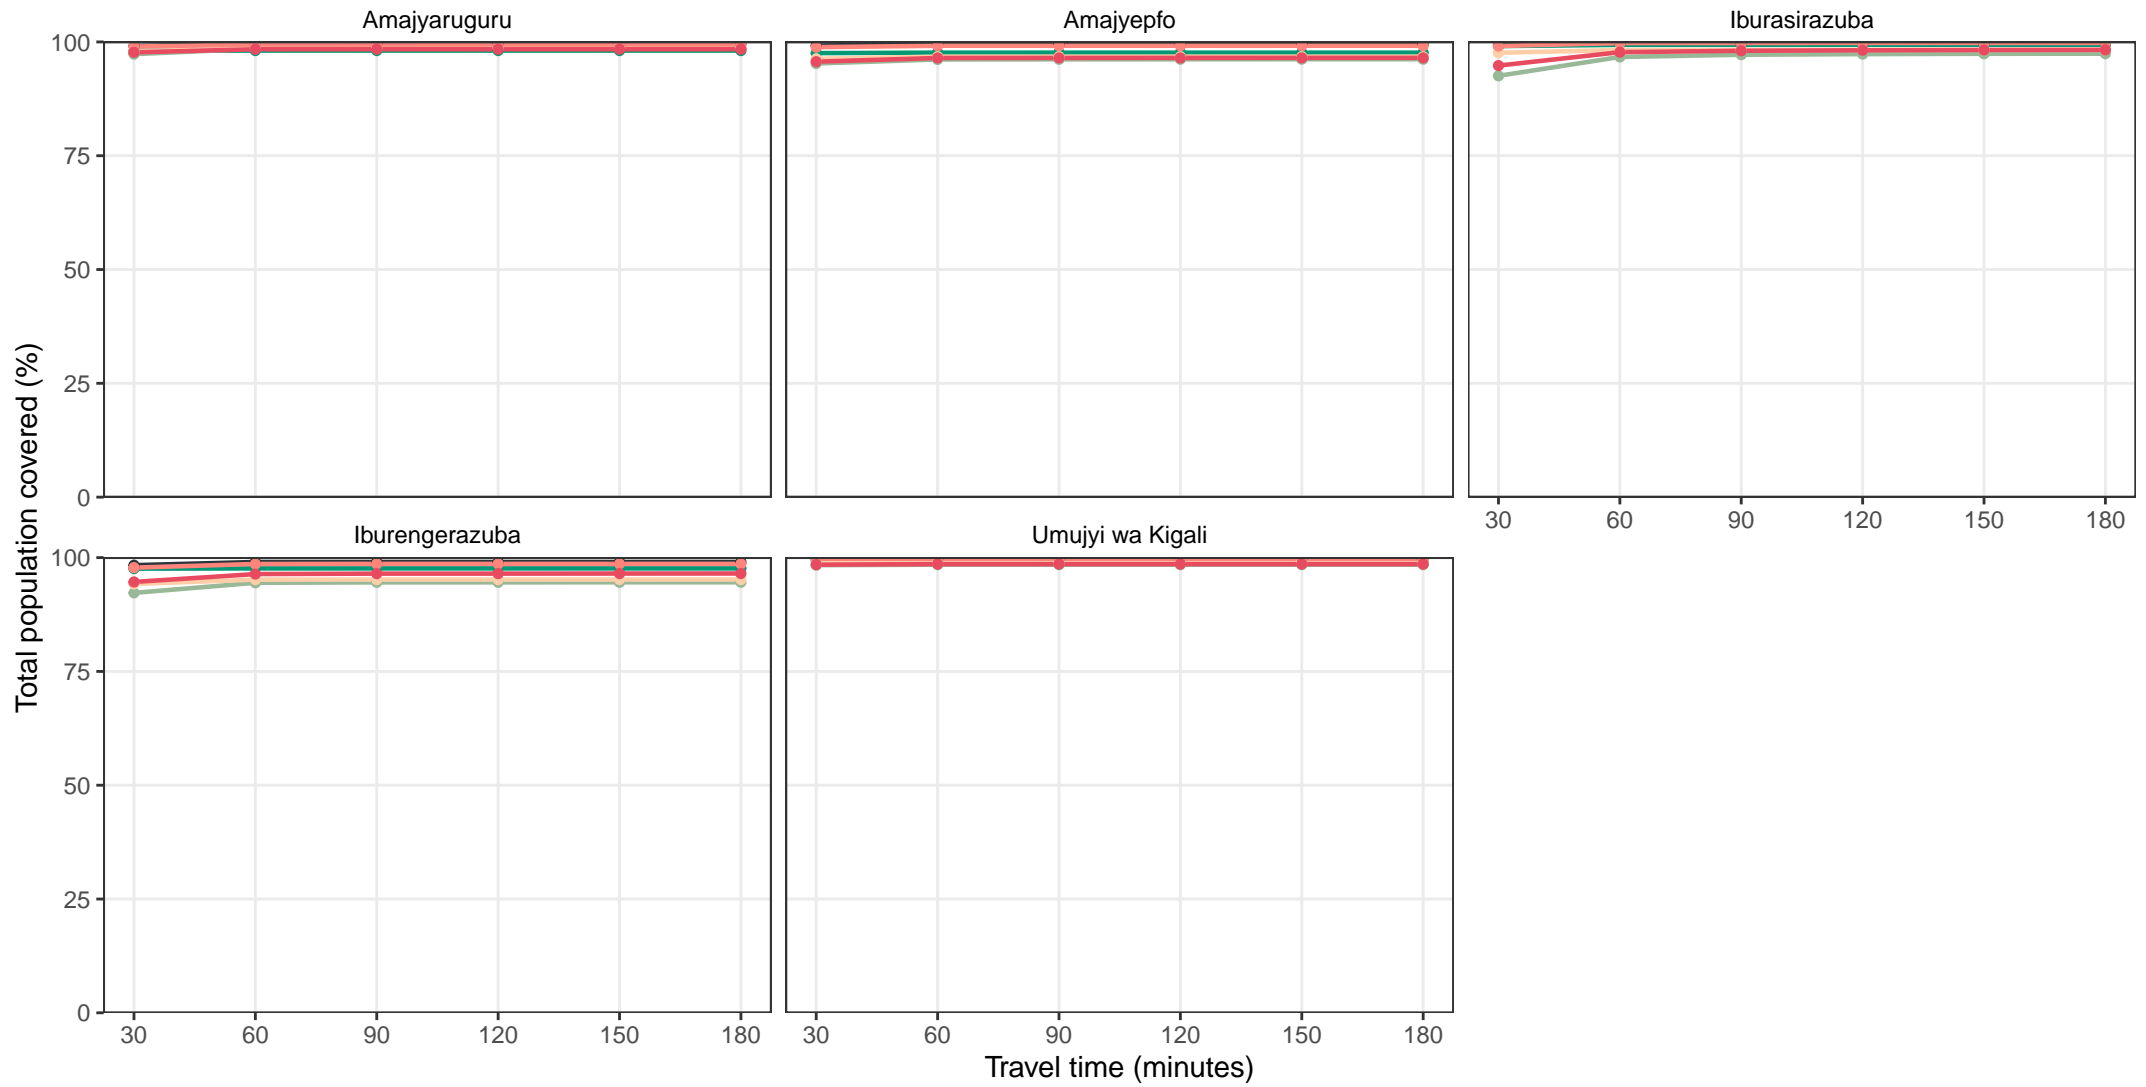

Supplementary Figure 36 – Accessibility coverage at 30, 60, 90, 120, and 150 minutes travel time at administrative level 1 for Rwanda.



# Sudan

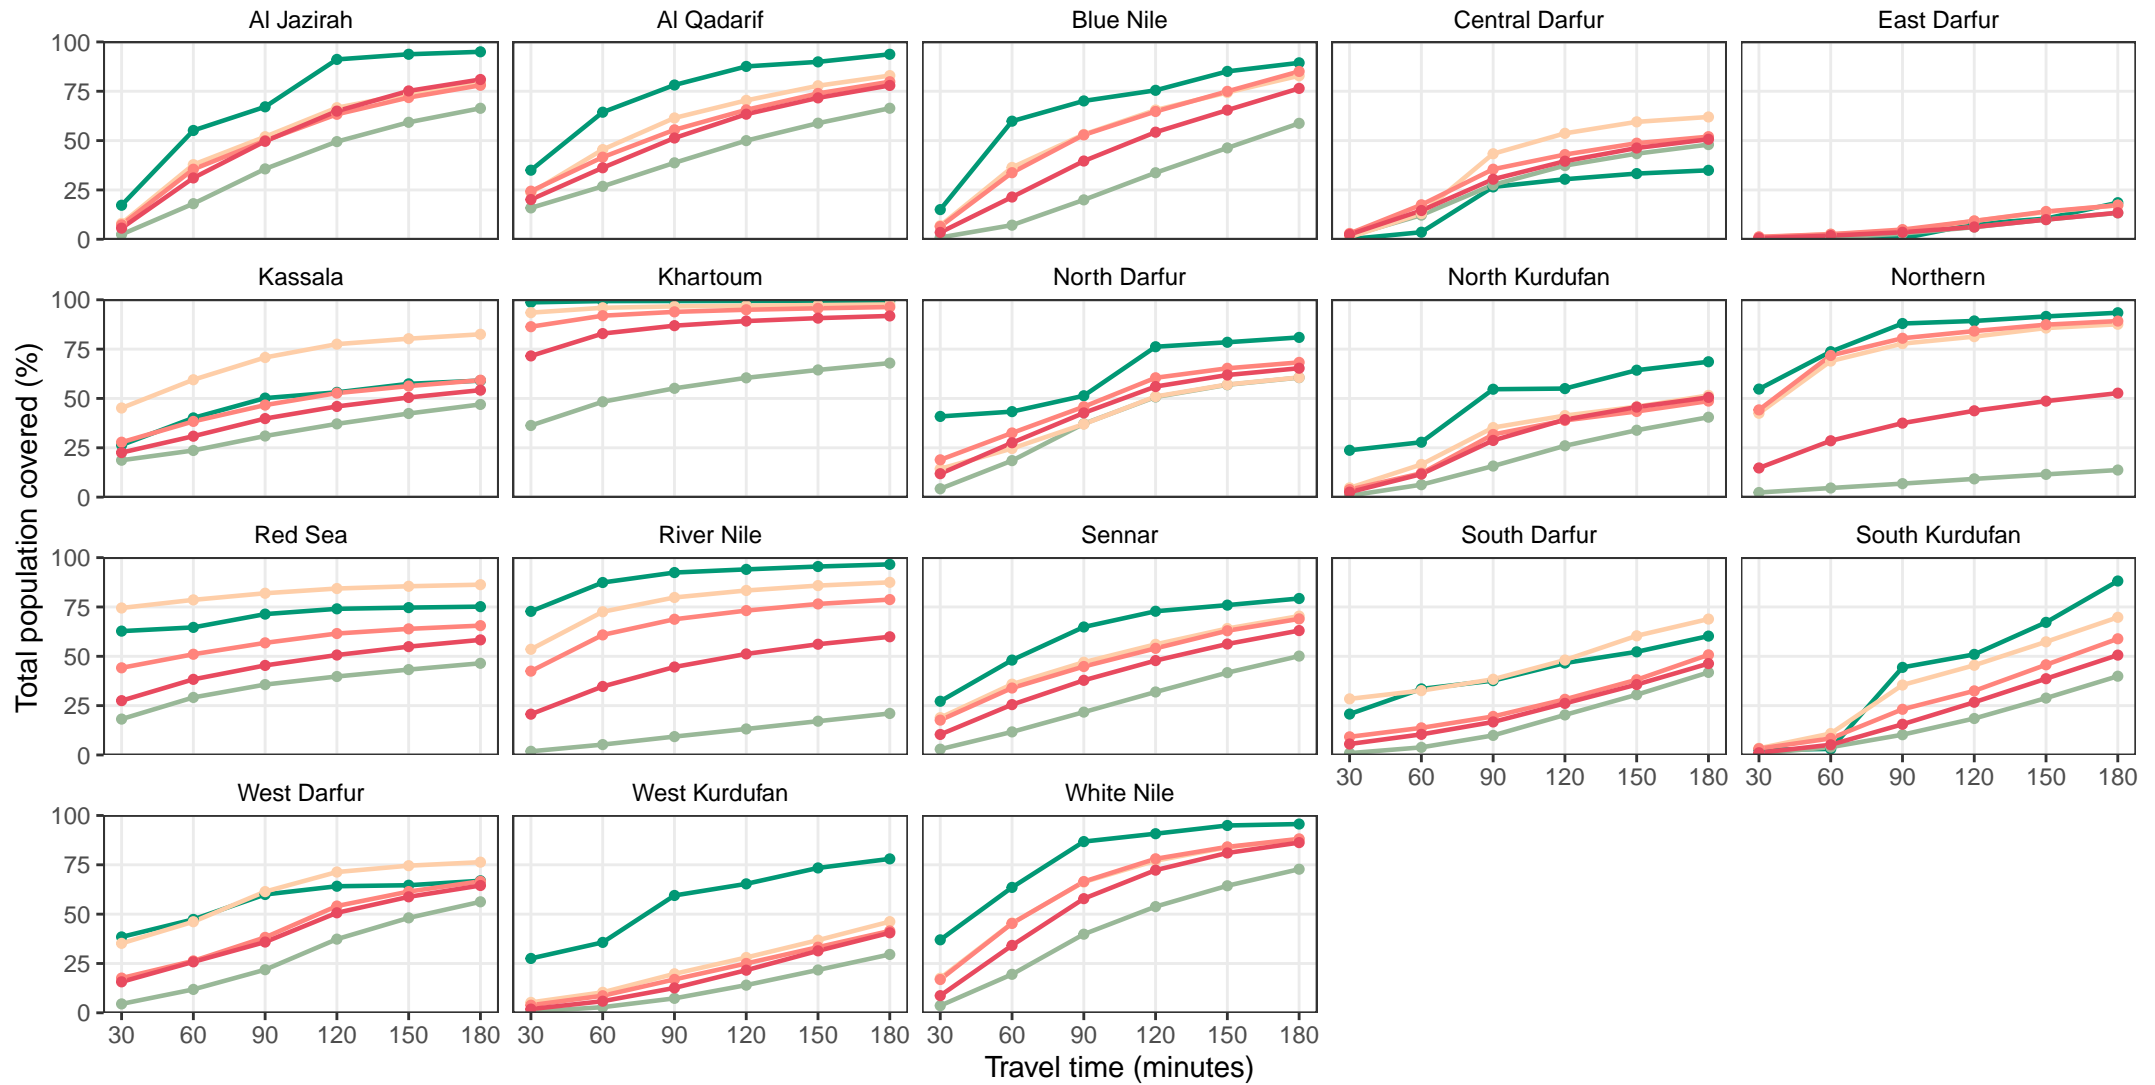

Supplementary Figure 37 – Accessibility coverage at 30, 60, 90, 120, and 150 minutes travel time at administrative level 1 for Sudan.

# Senegal

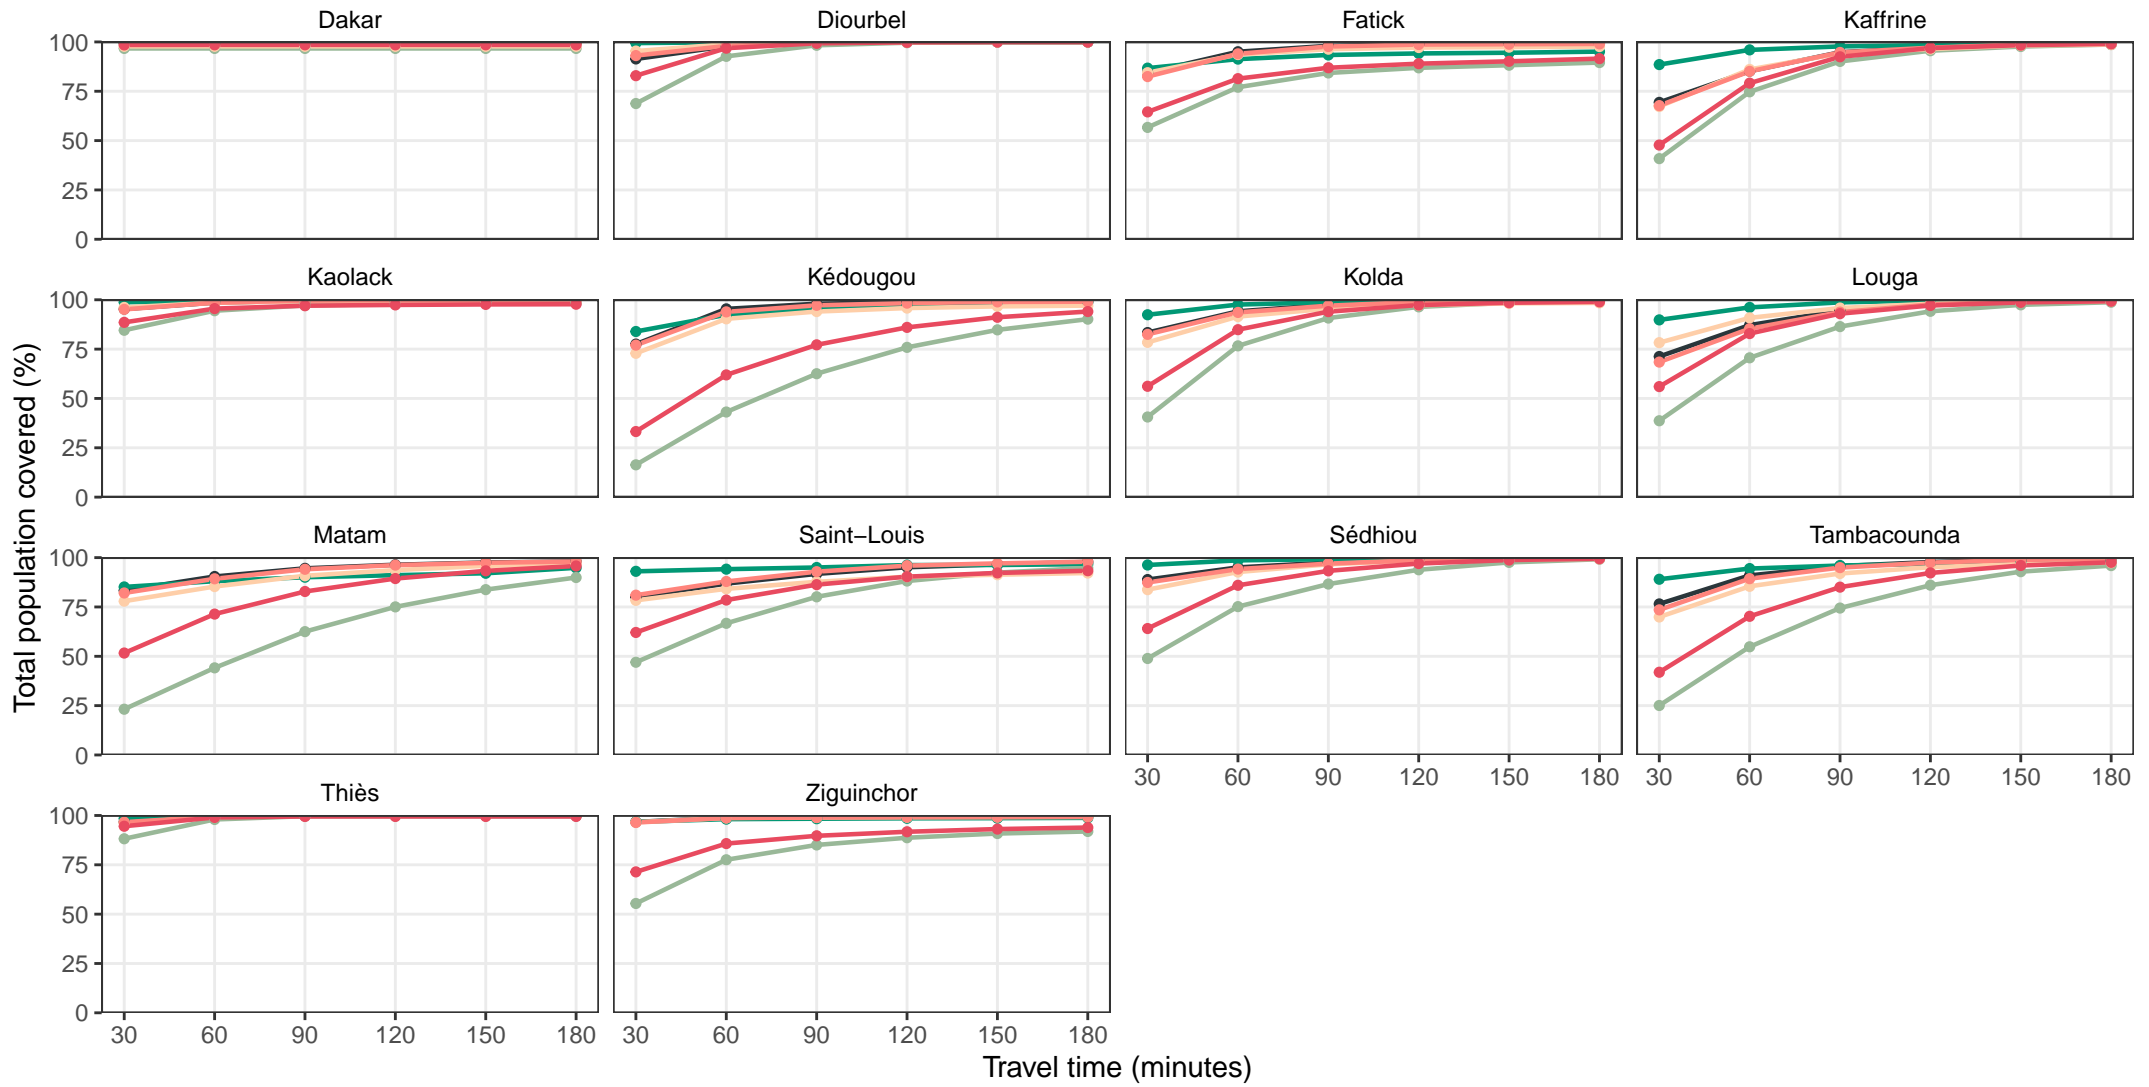

Supplementary Figure 38 – Accessibility coverage at 30, 60, 90, 120, and 150 minutes travel time at administrative level 1 for Senegal.

# Sierra Leone

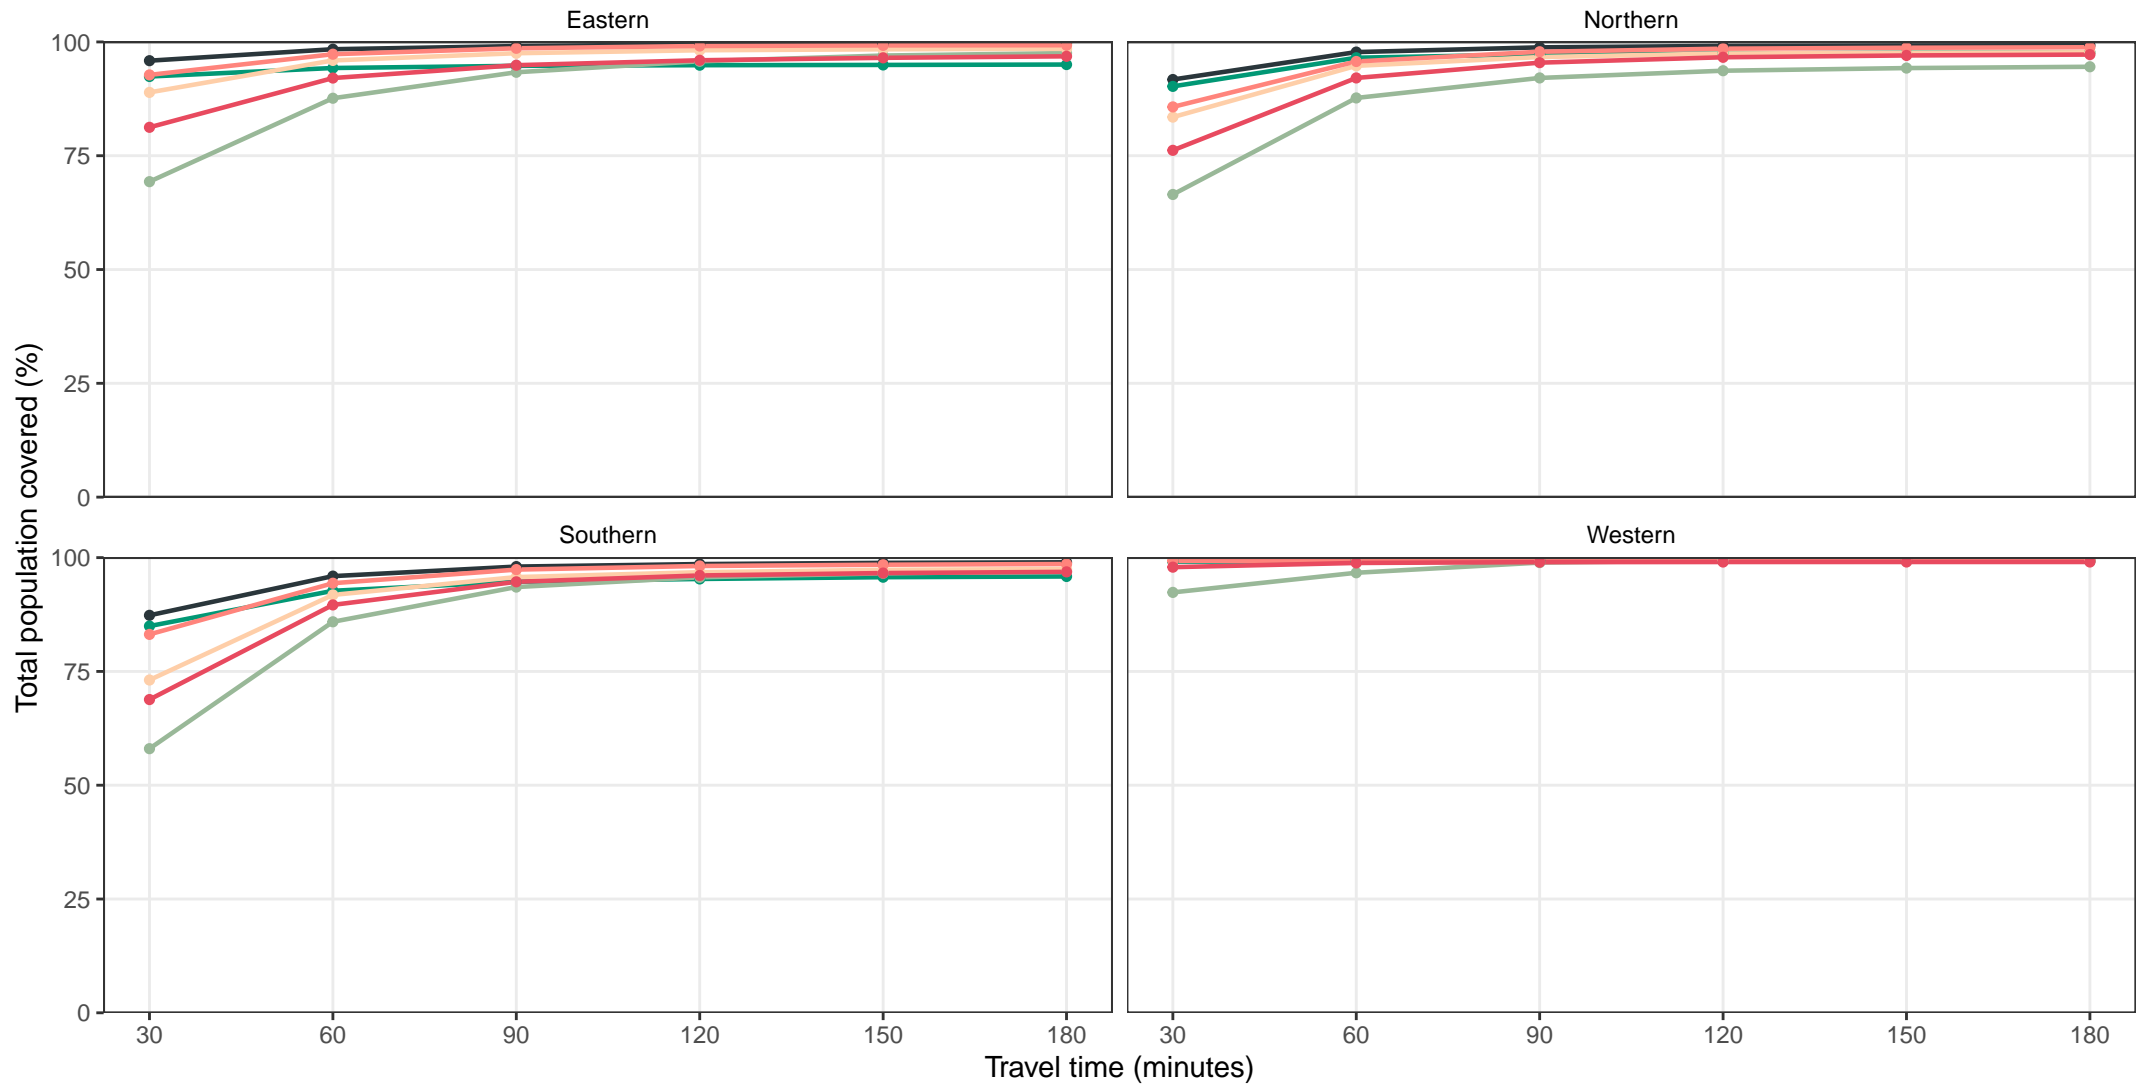

Supplementary Figure 39 – Accessibility coverage at 30, 60, 90, 120, and 150 minutes travel time at administrative level 1 for Sierra Leone.

# Somalia

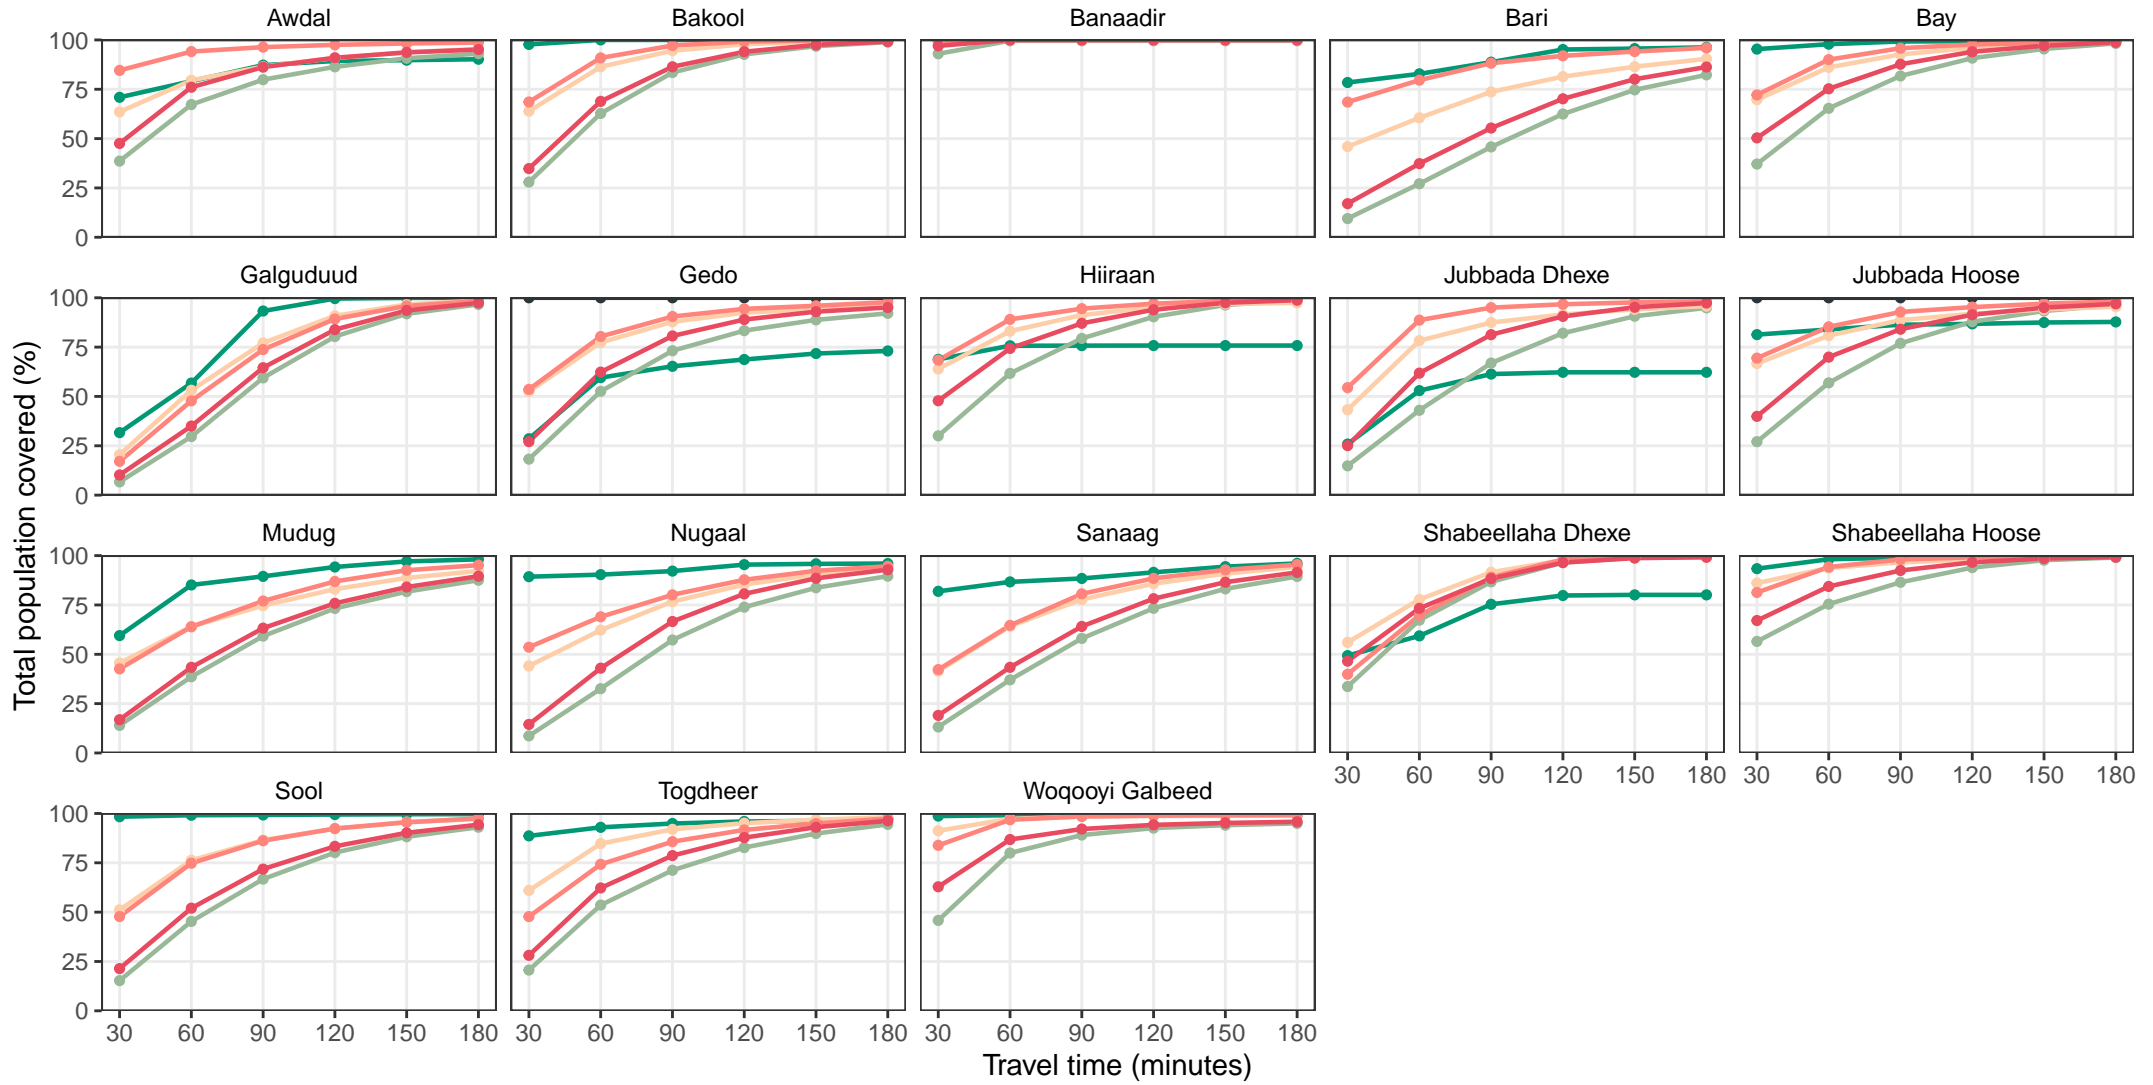

Supplementary Figure 40 – Accessibility coverage at 30, 60, 90, 120, and 150 minutes travel time at administrative level 1 for Somalia.

# South Sudan

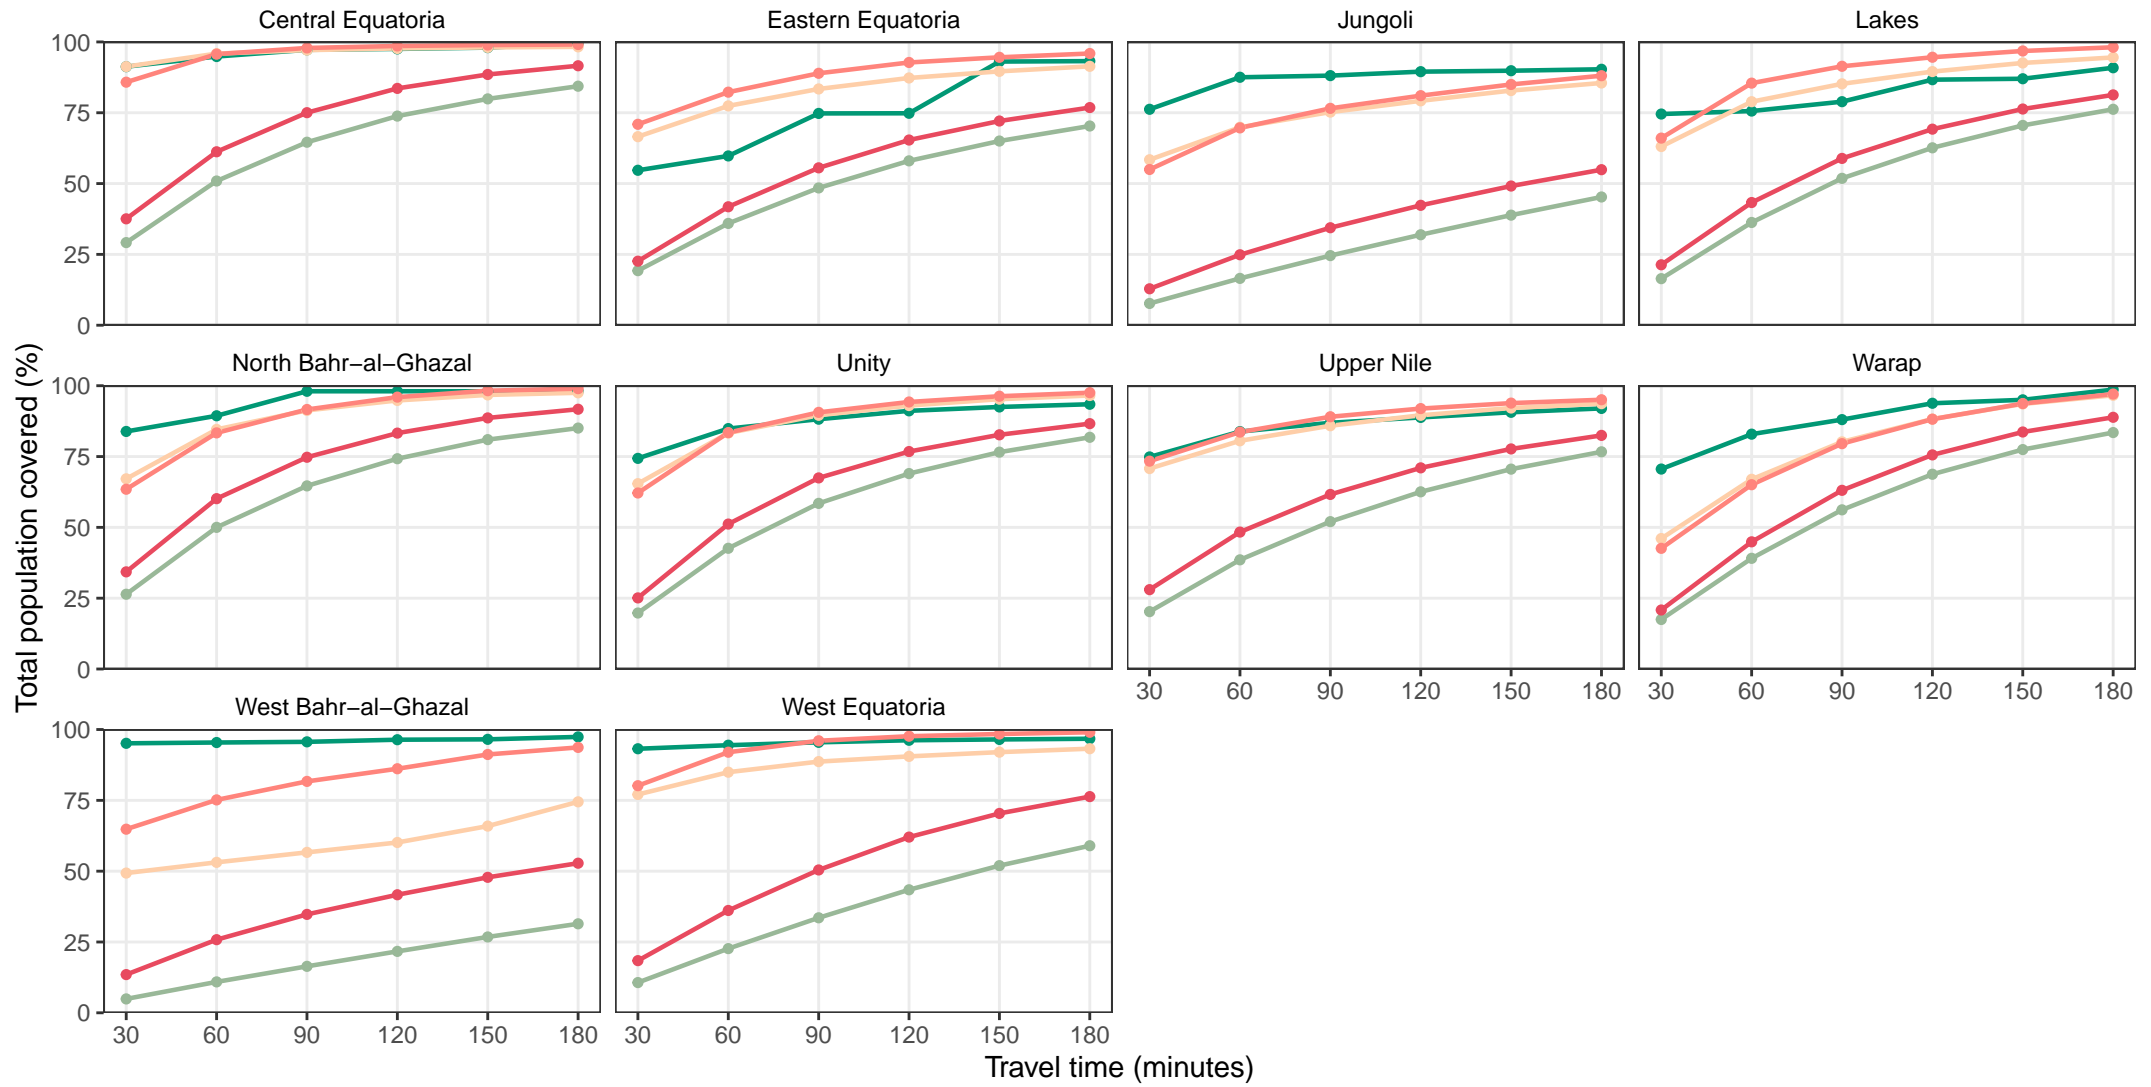

Supplementary Figure 41 – Accessibility coverage at 30, 60, 90, 120, and 150 minutes travel time at administrative level 1 for South Sudan.

# São Tomé and Príncipe

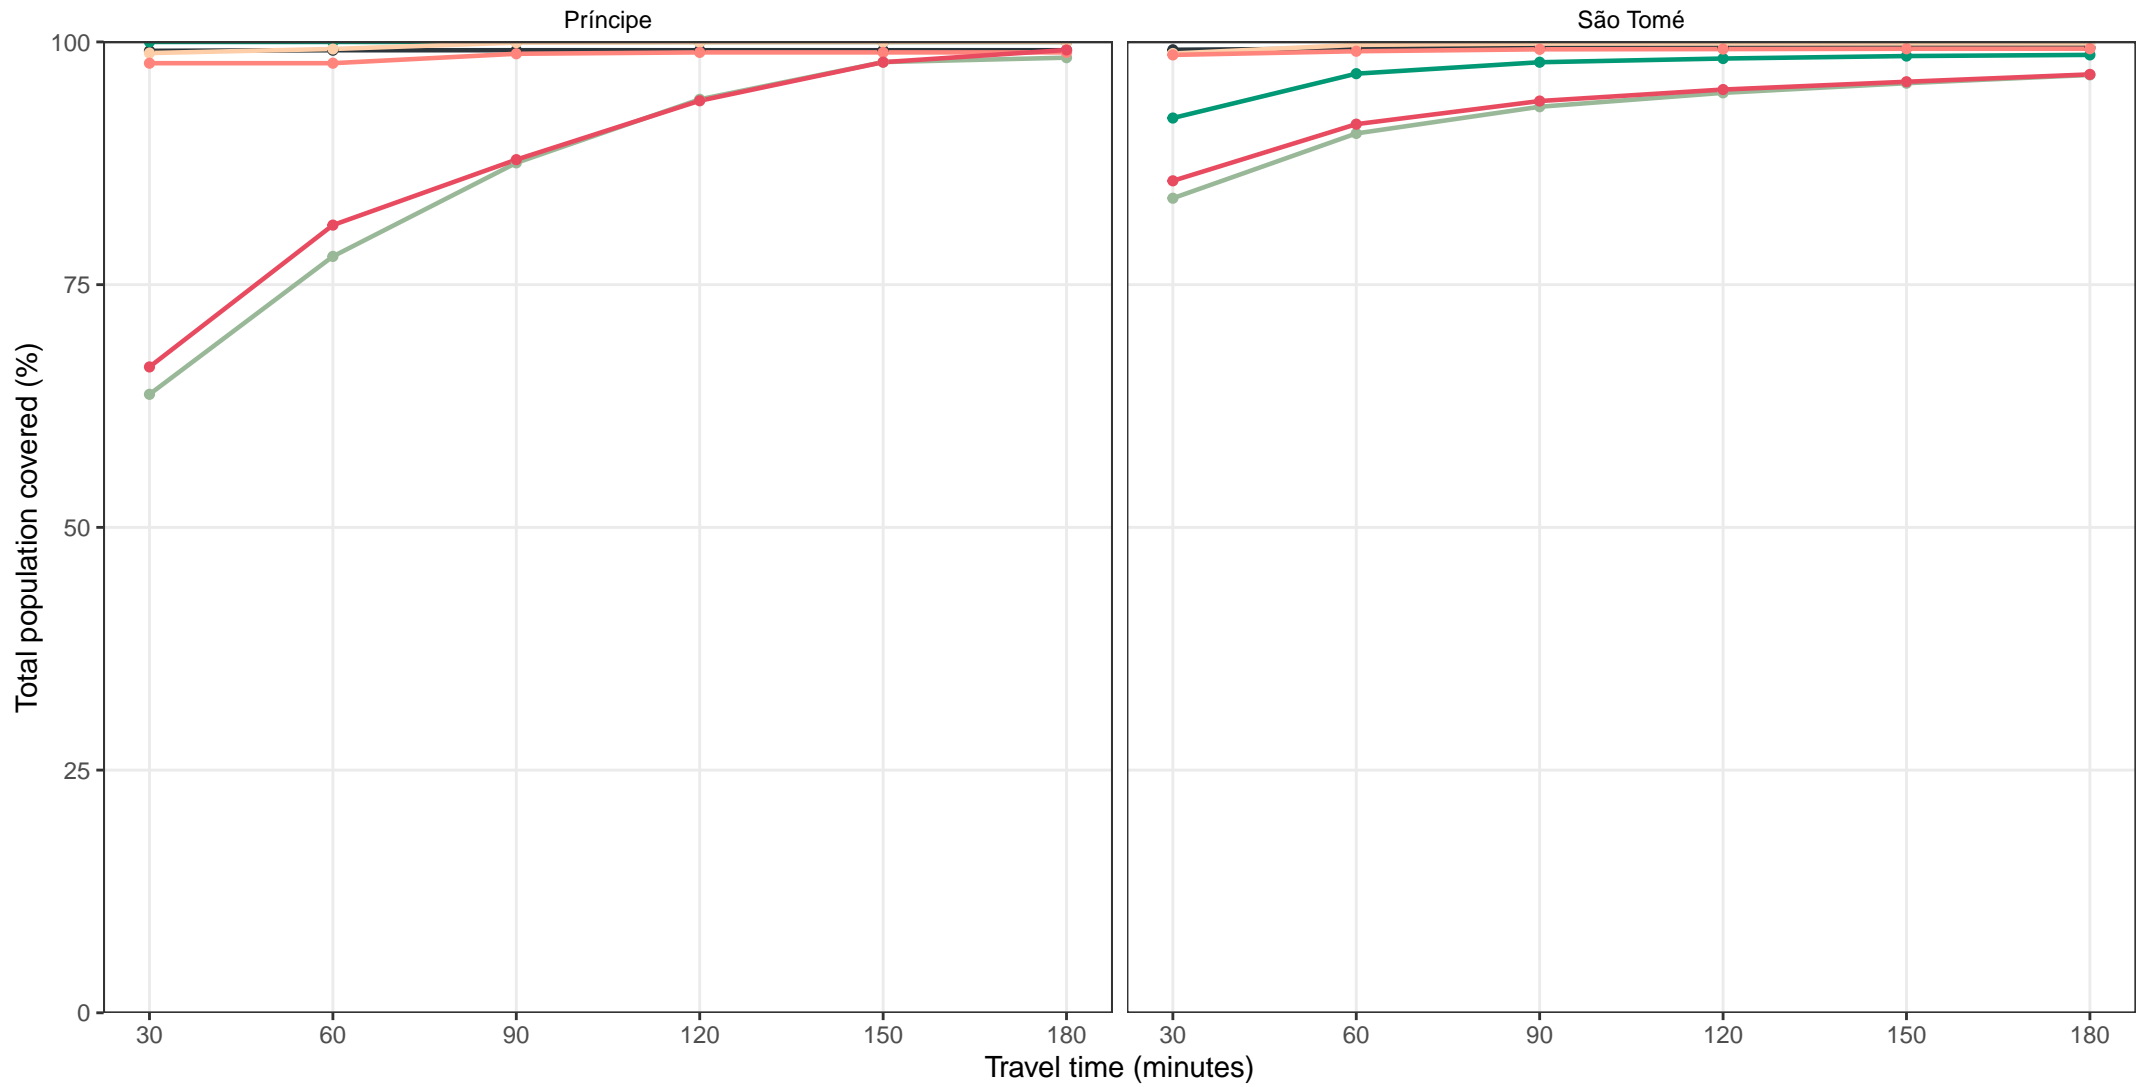

- HRSL
- GPWv4
- WorldPop constrained
- GHS-POP
- LandScan
- WorldPop unconstrained

Supplementary Figure 42 – Accessibility coverage at 30, 60, 90, 120, and 150 minutes travel time at administrative level 1 for São Tomé and Príncipe.

# Swaziland

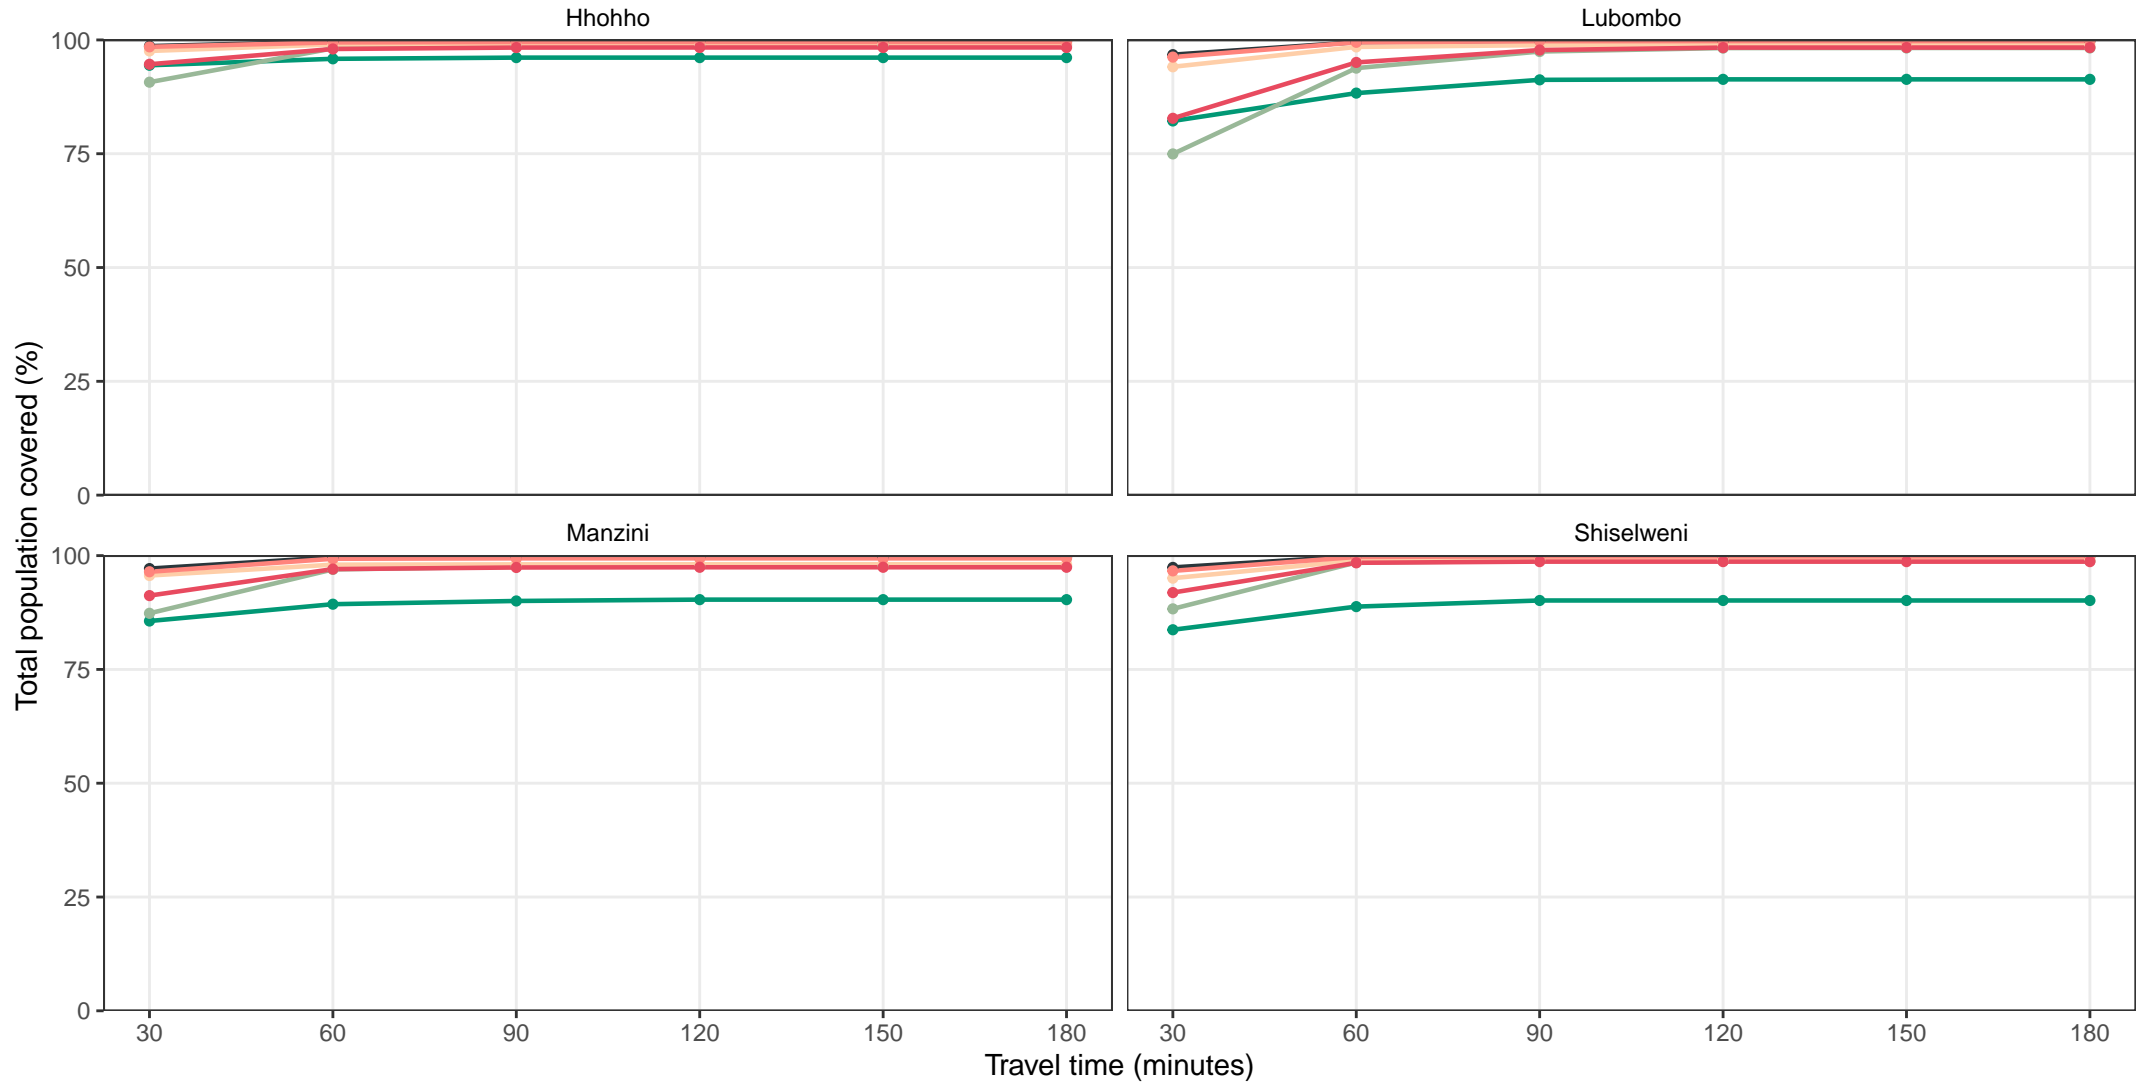

Supplementary Figure 43 – Accessibility coverage at 30, 60, 90, 120, and 150 minutes travel time at administrative level 1 for Swaziland.

# Seychelles

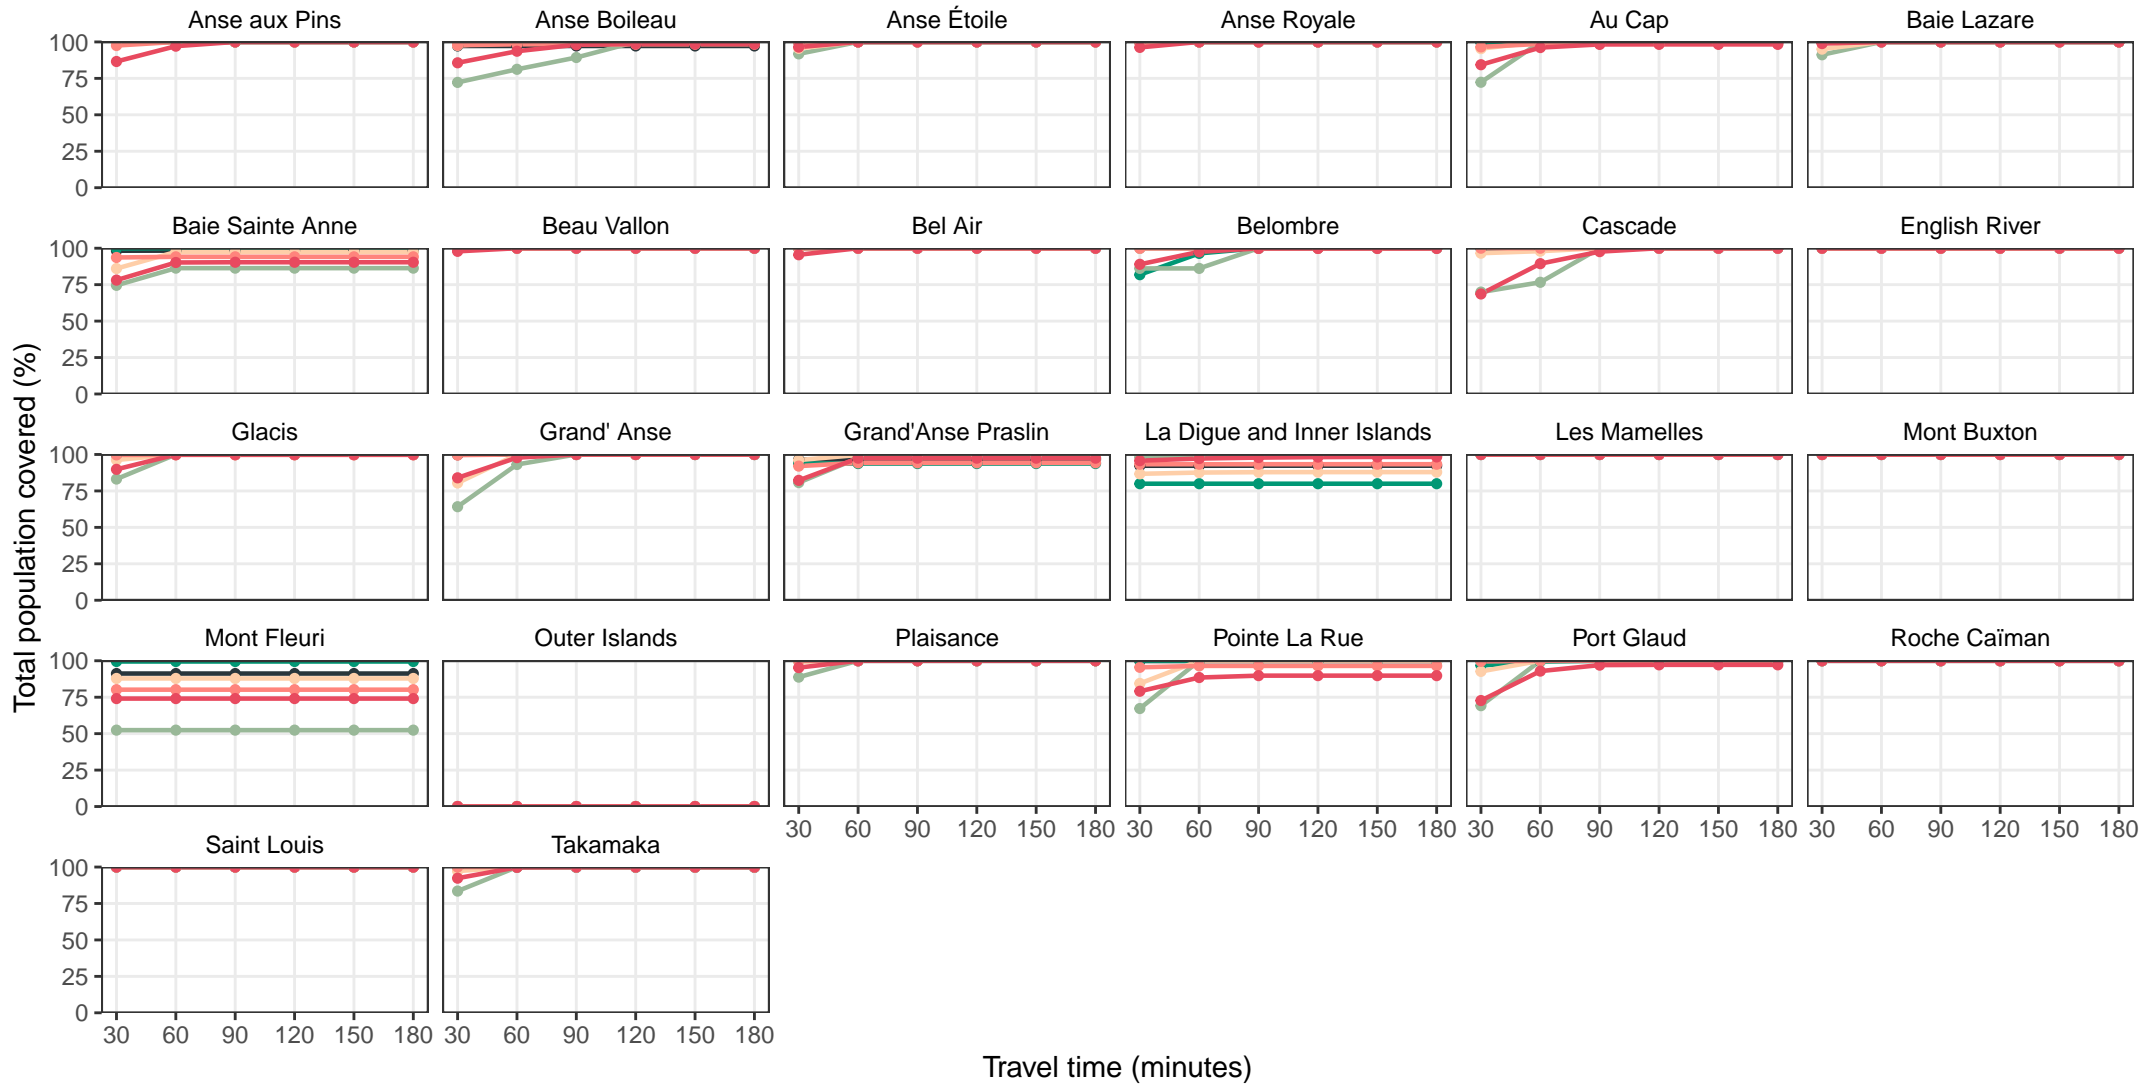

Supplementary Figure 44 – Accessibility coverage at 30, 60, 90, 120, and 150 minutes travel time at administrative level 1 for Seychelles.



# Chad

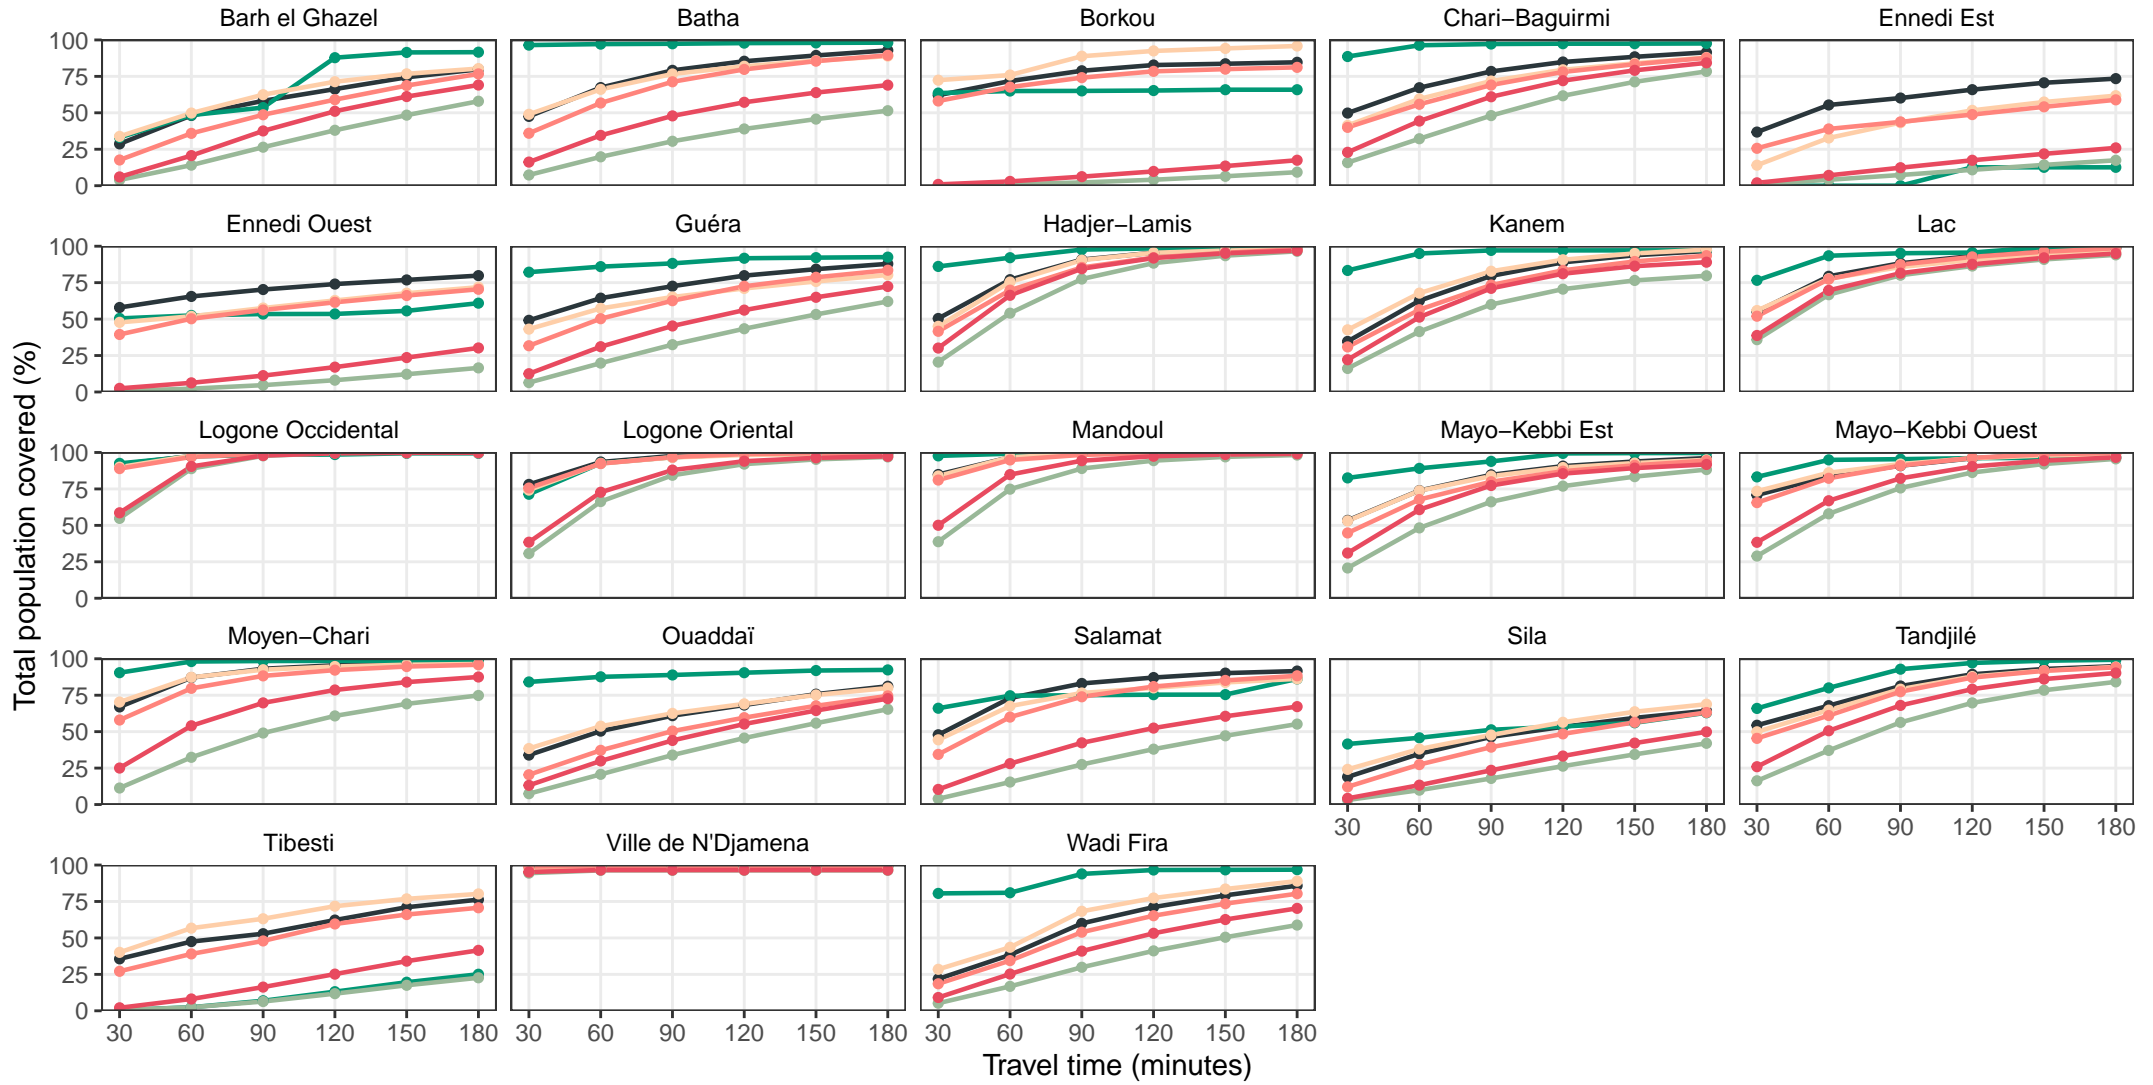

Supplementary Figure 45 – Accessibility coverage at 30, 60, 90, 120, and 150 minutes travel time at administrative level 1 for Chad.

# Togo

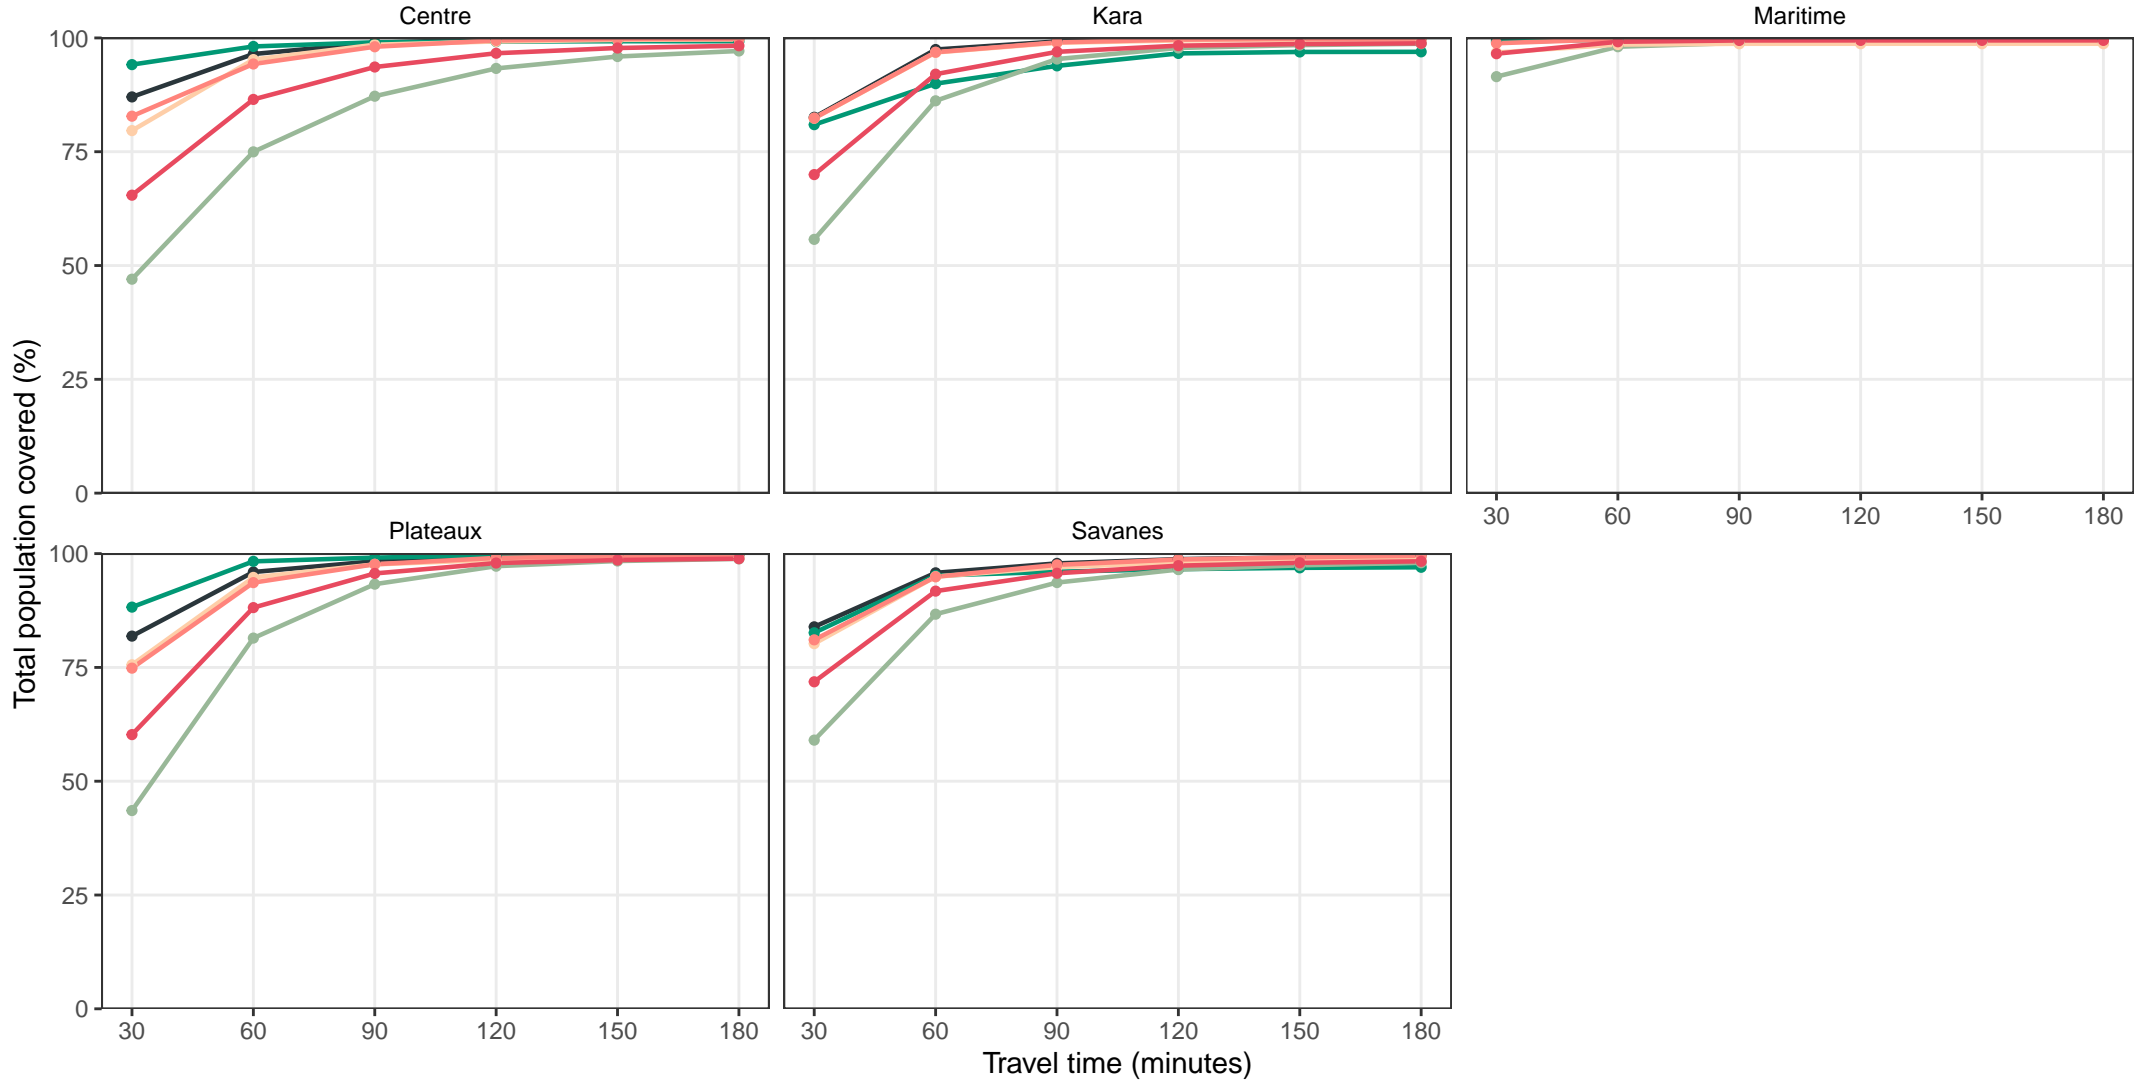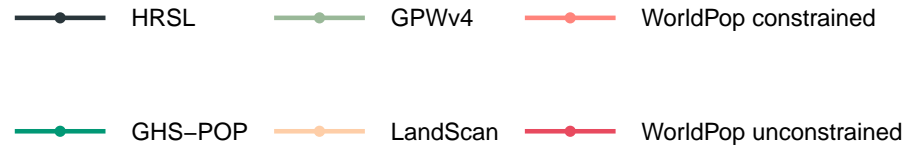

Supplementary Figure 46 – Accessibility coverage at 30, 60, 90, 120, and 150 minutes travel time at administrative level 1 for Togo.

# Tanzania

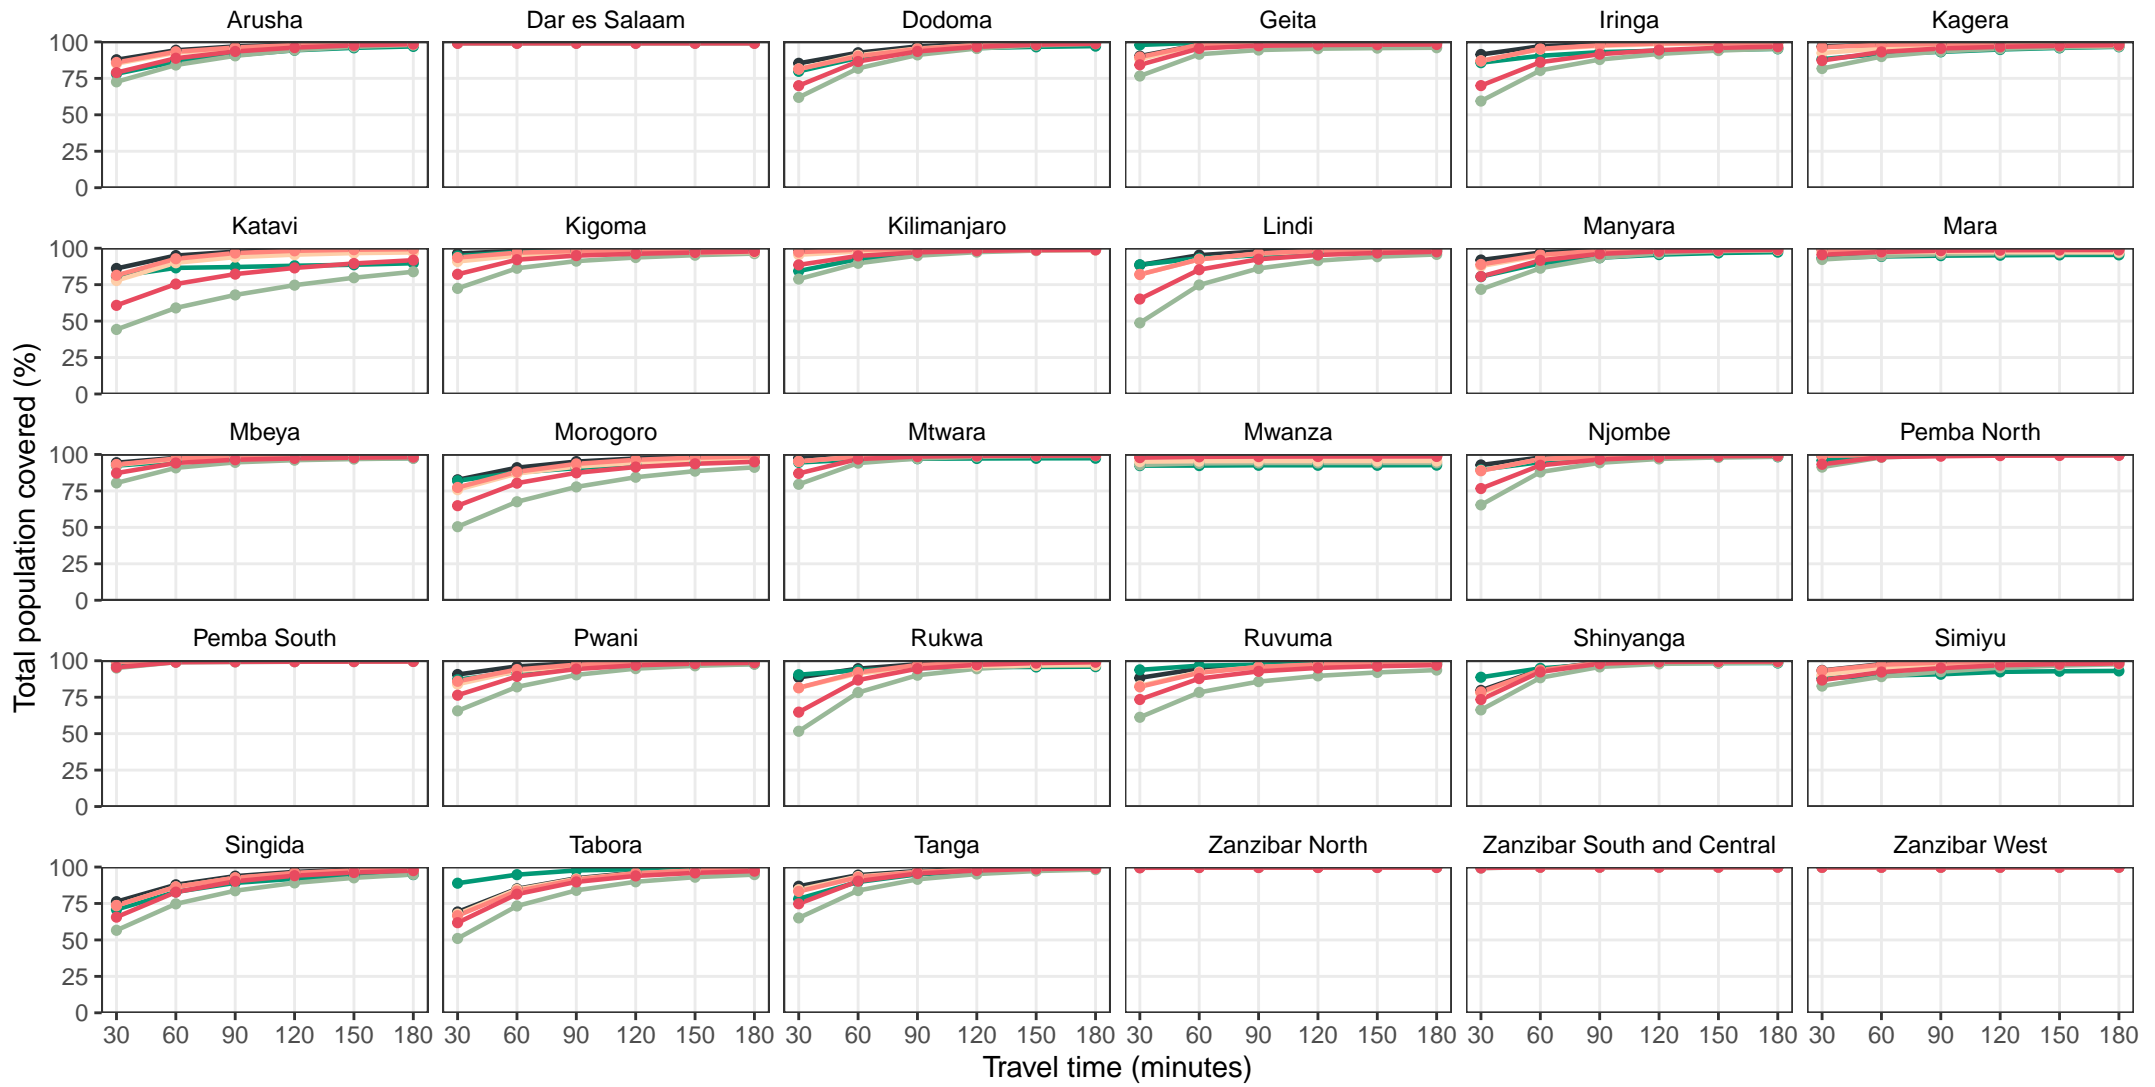

Supplementary Figure 47 – Accessibility coverage at 30, 60, 90, 120, and 150 minutes travel time at administrative level 1 for Tanzania.

# Uganda

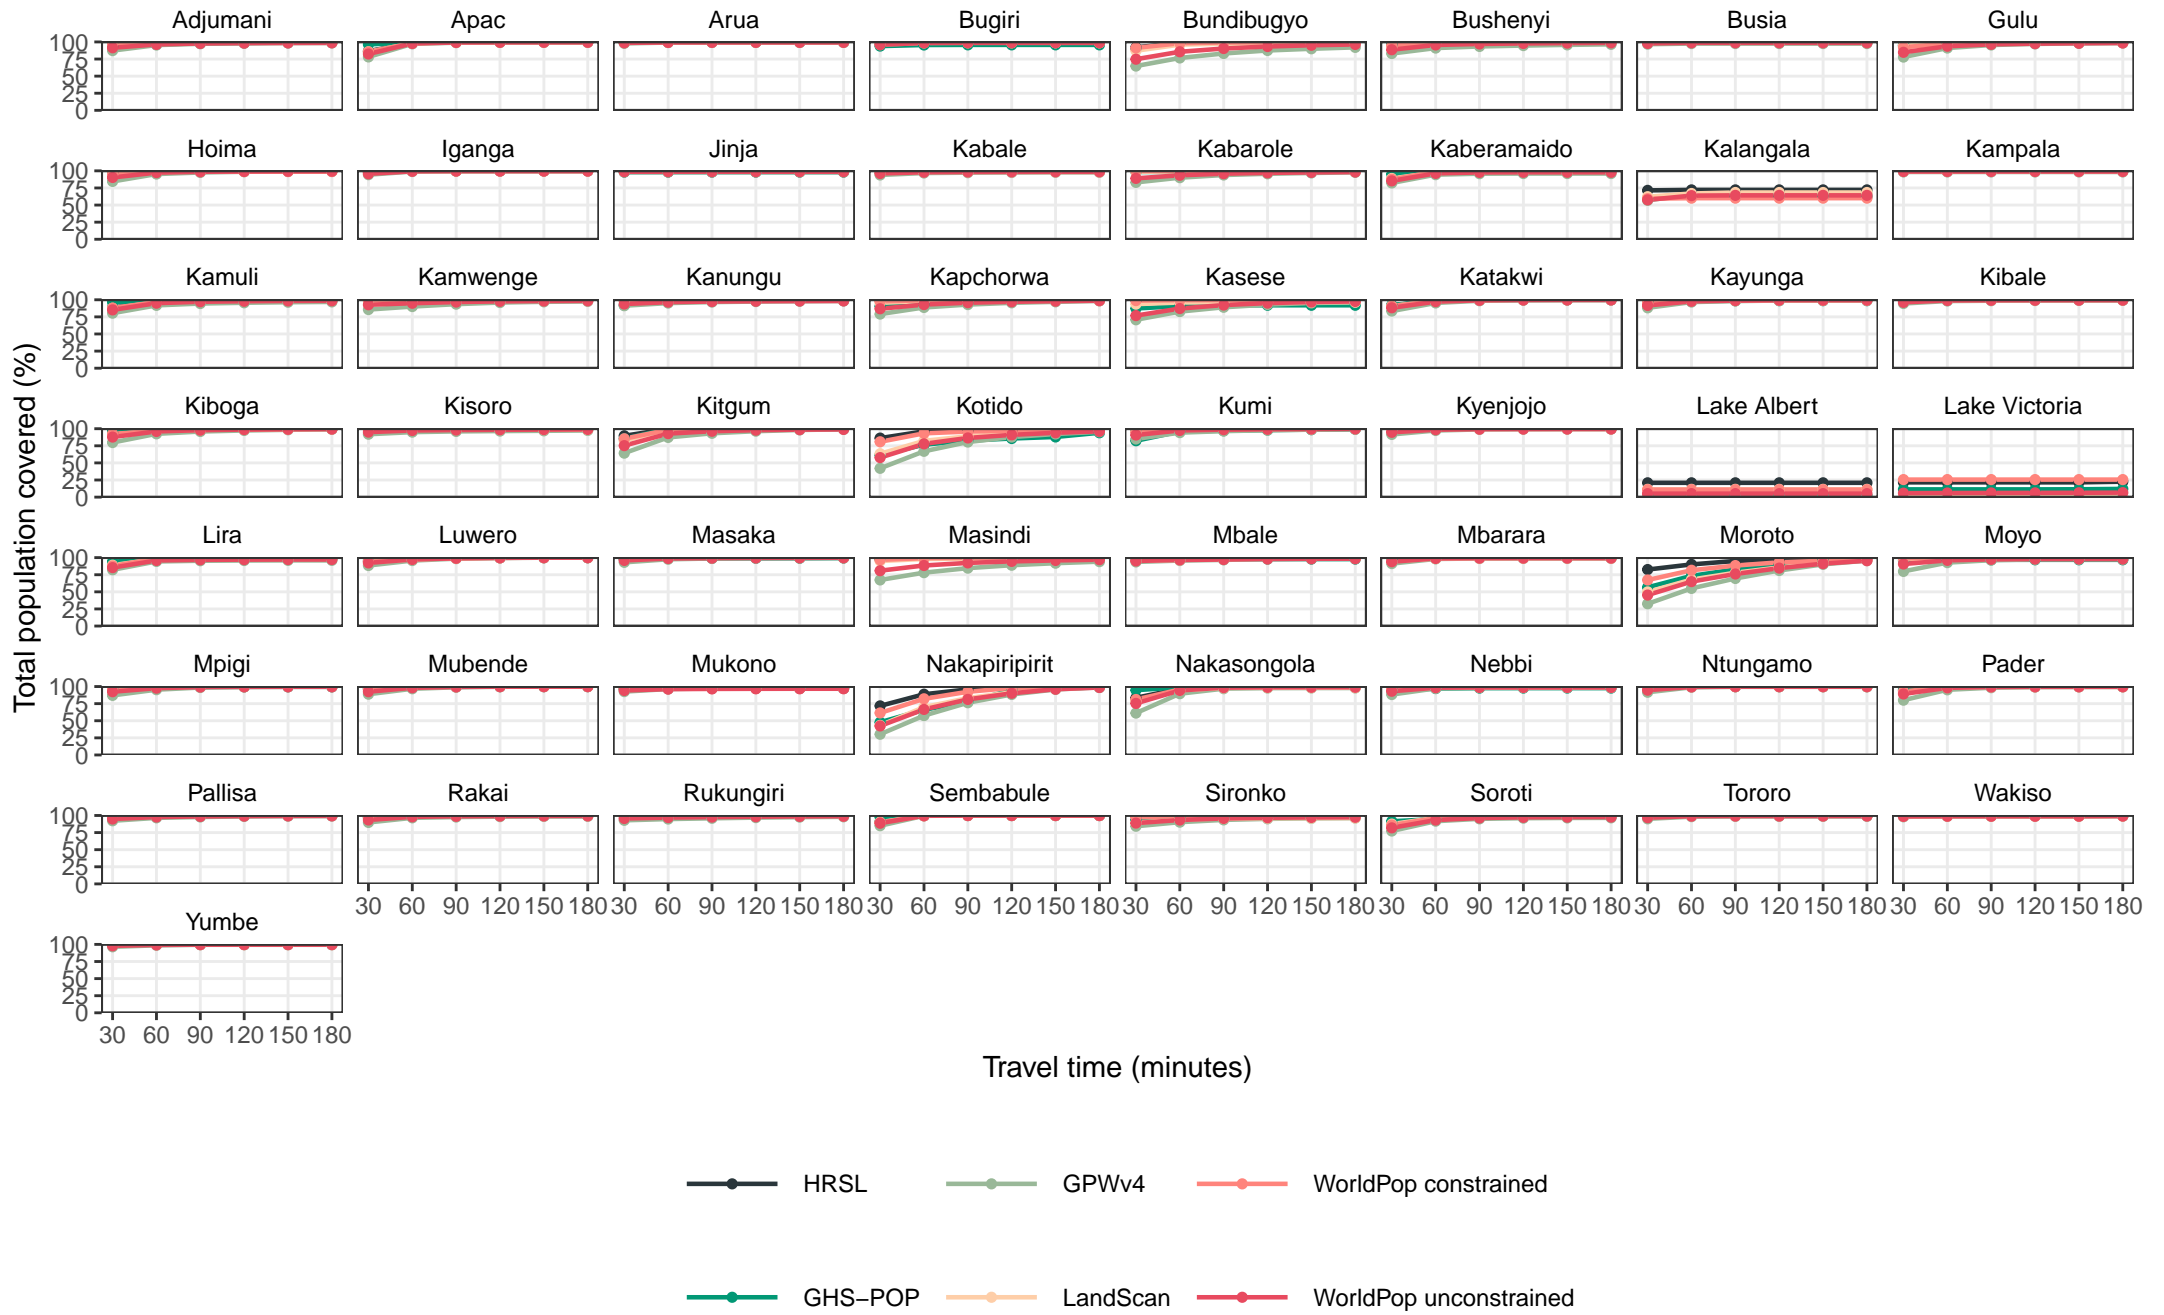

Supplementary Figure 48 – Accessibility coverage at 30, 60, 90, 120, and 150 minutes travel time at administrative level 1 for Uganda.

# South Africa

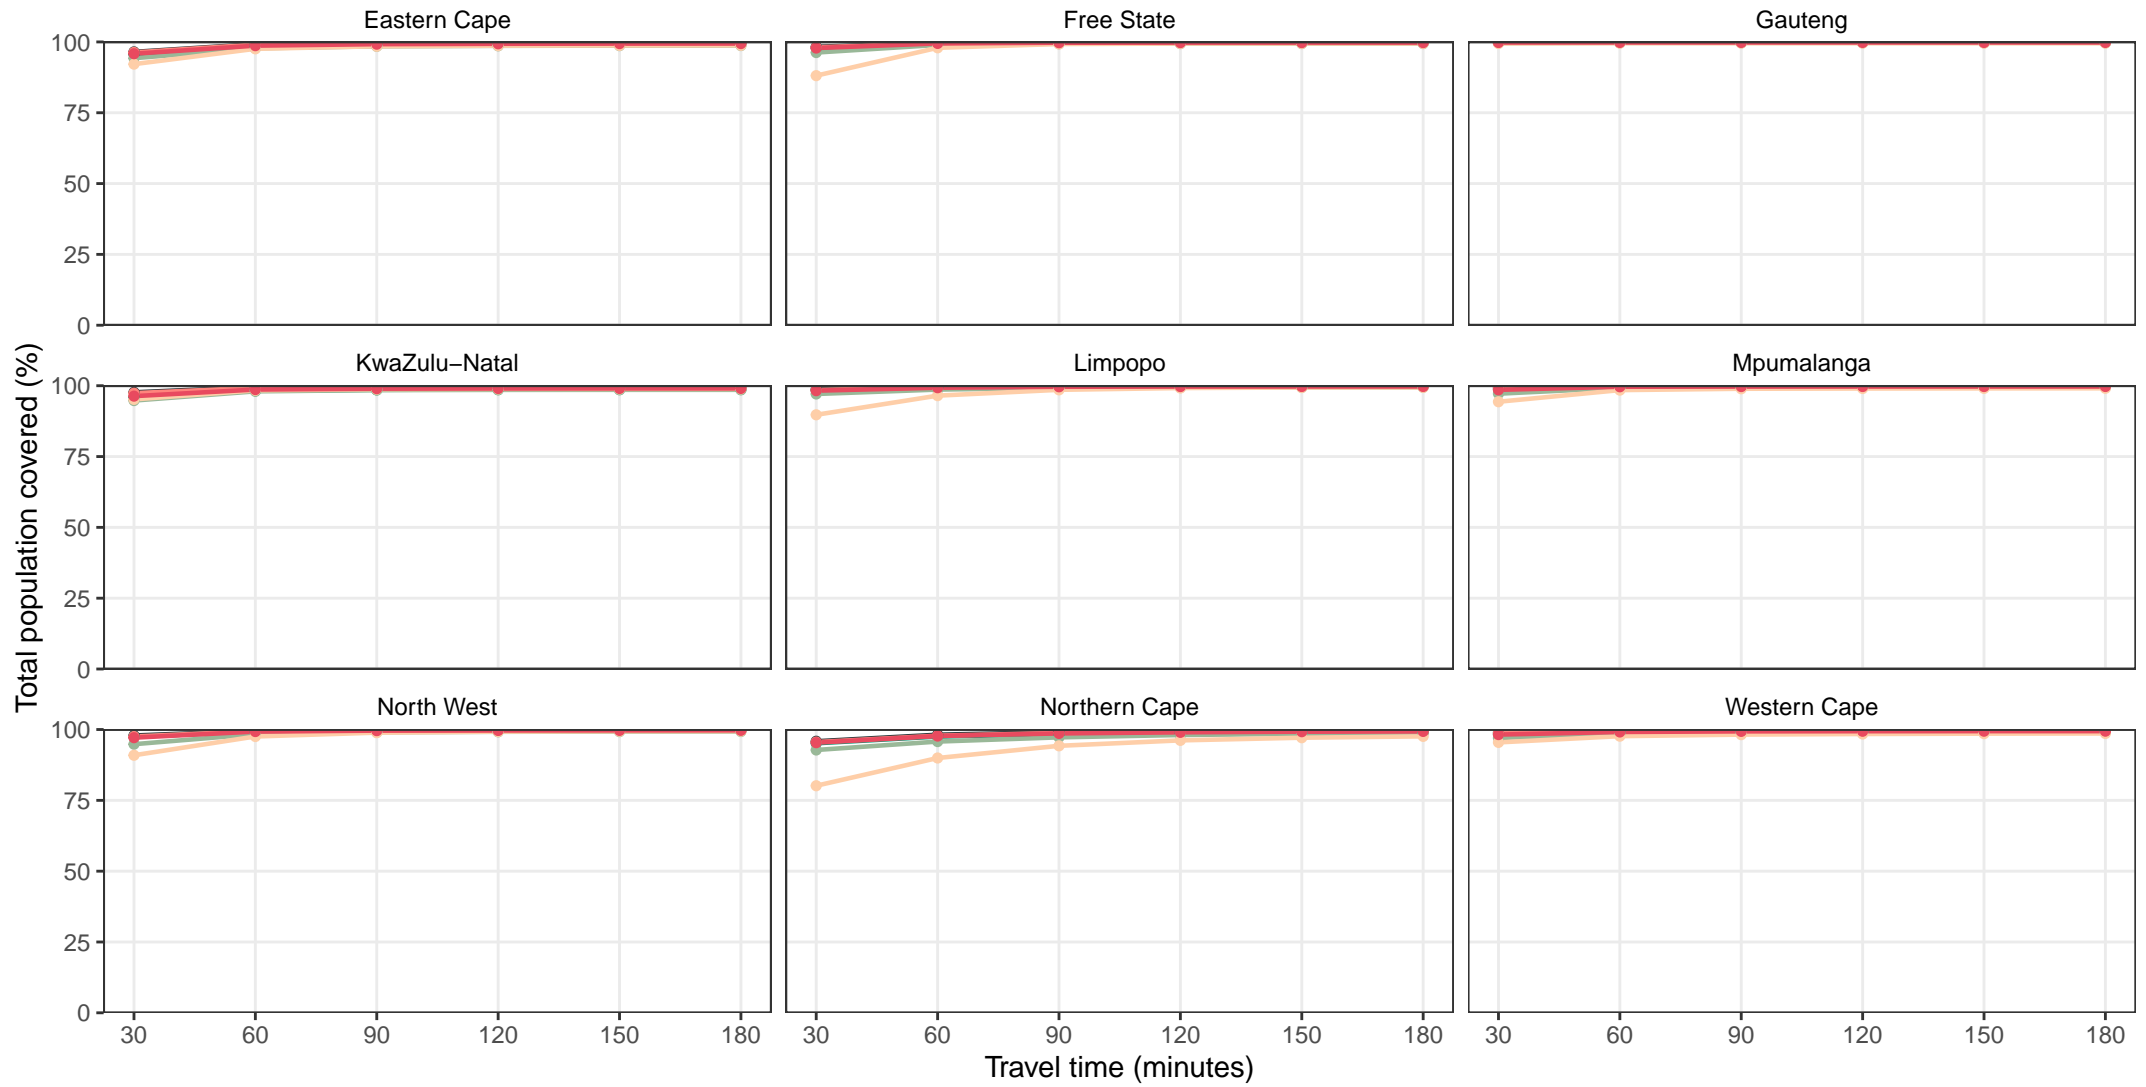

Supplementary Figure 49 – Accessibility coverage at 30, 60, 90, 120, and 150 minutes travel time at administrative level 1 for South Africa.

# Zambia

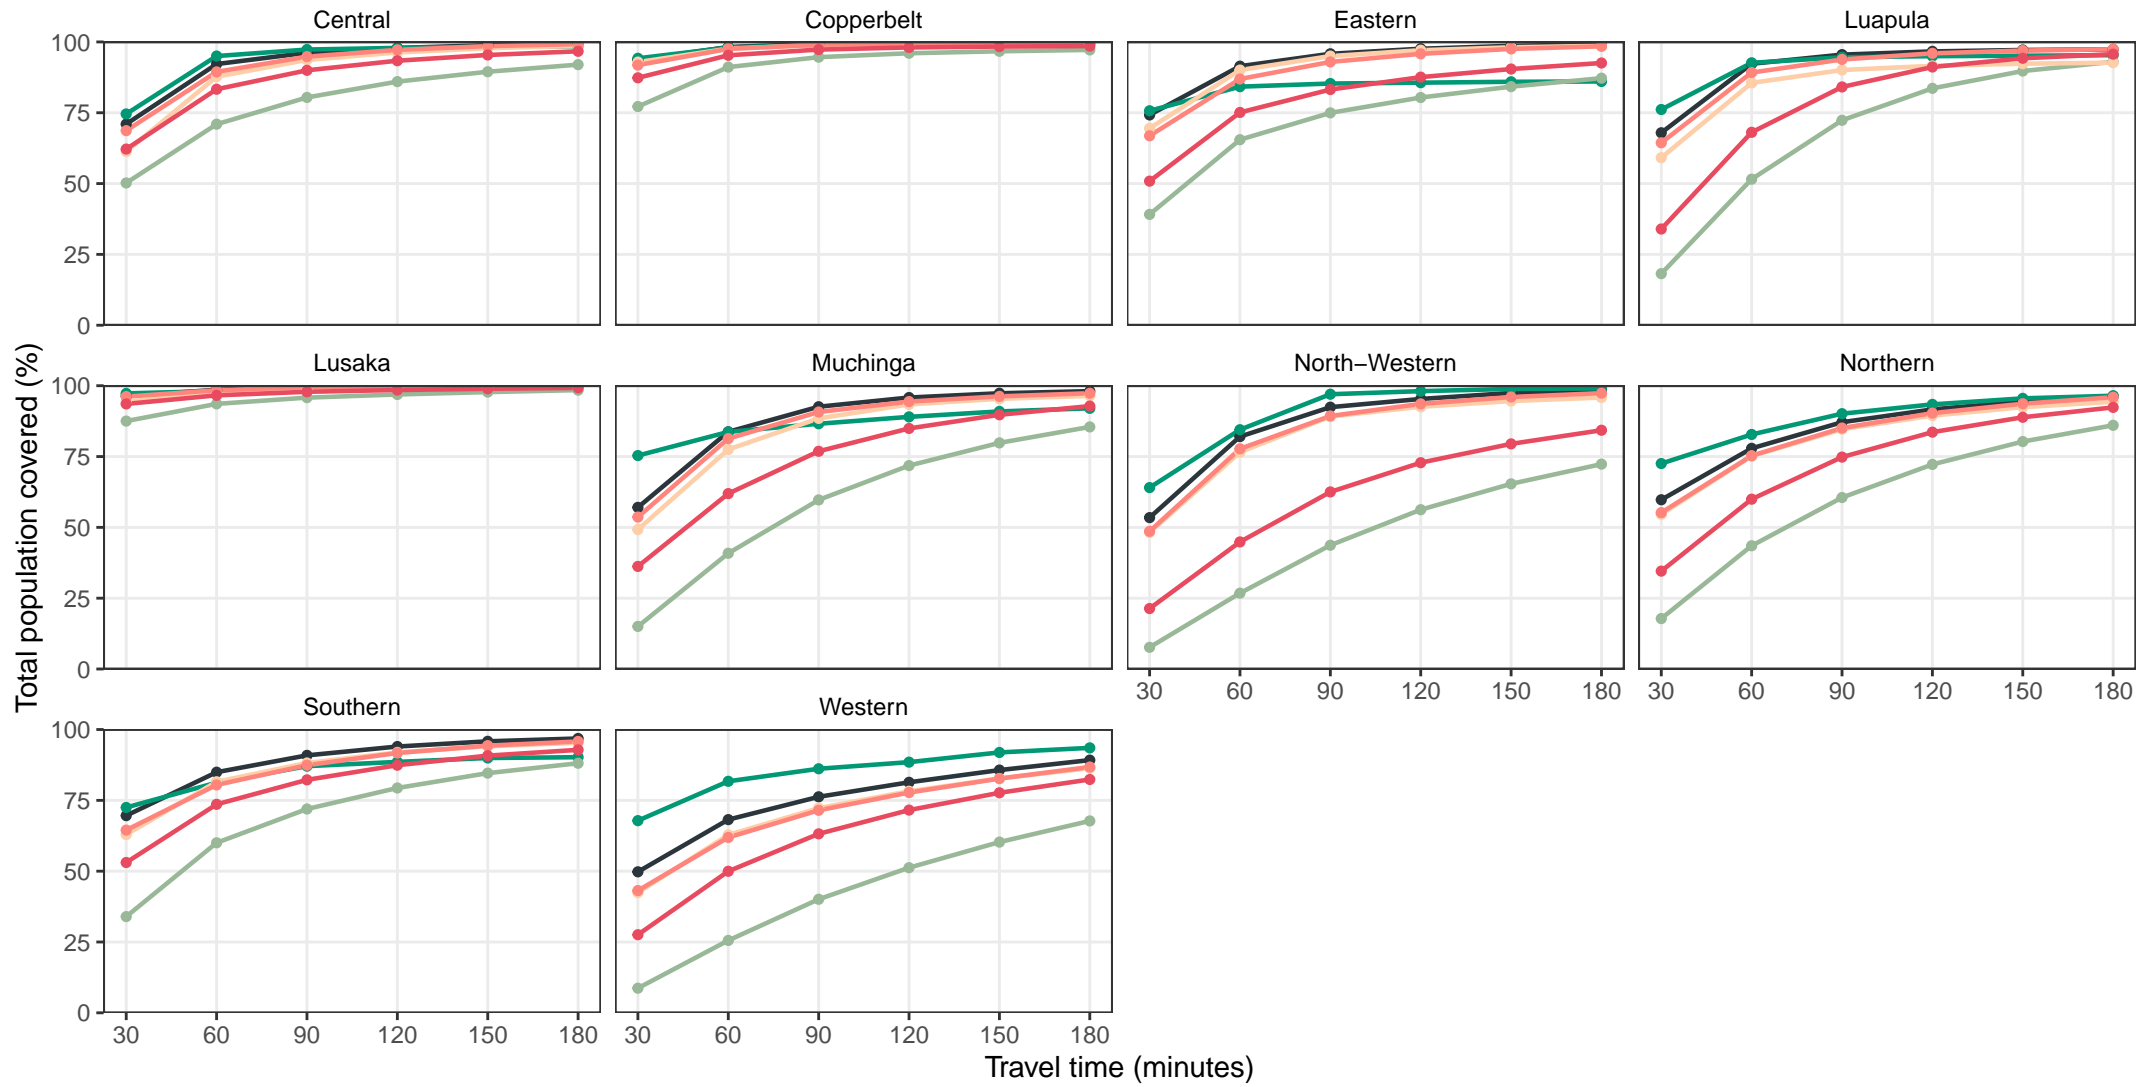

Supplementary Figure 50 – Accessibility coverage at 30, 60, 90, 120, and 150 minutes travel time at administrative level 1 for Zambia.

# Zimbabwe

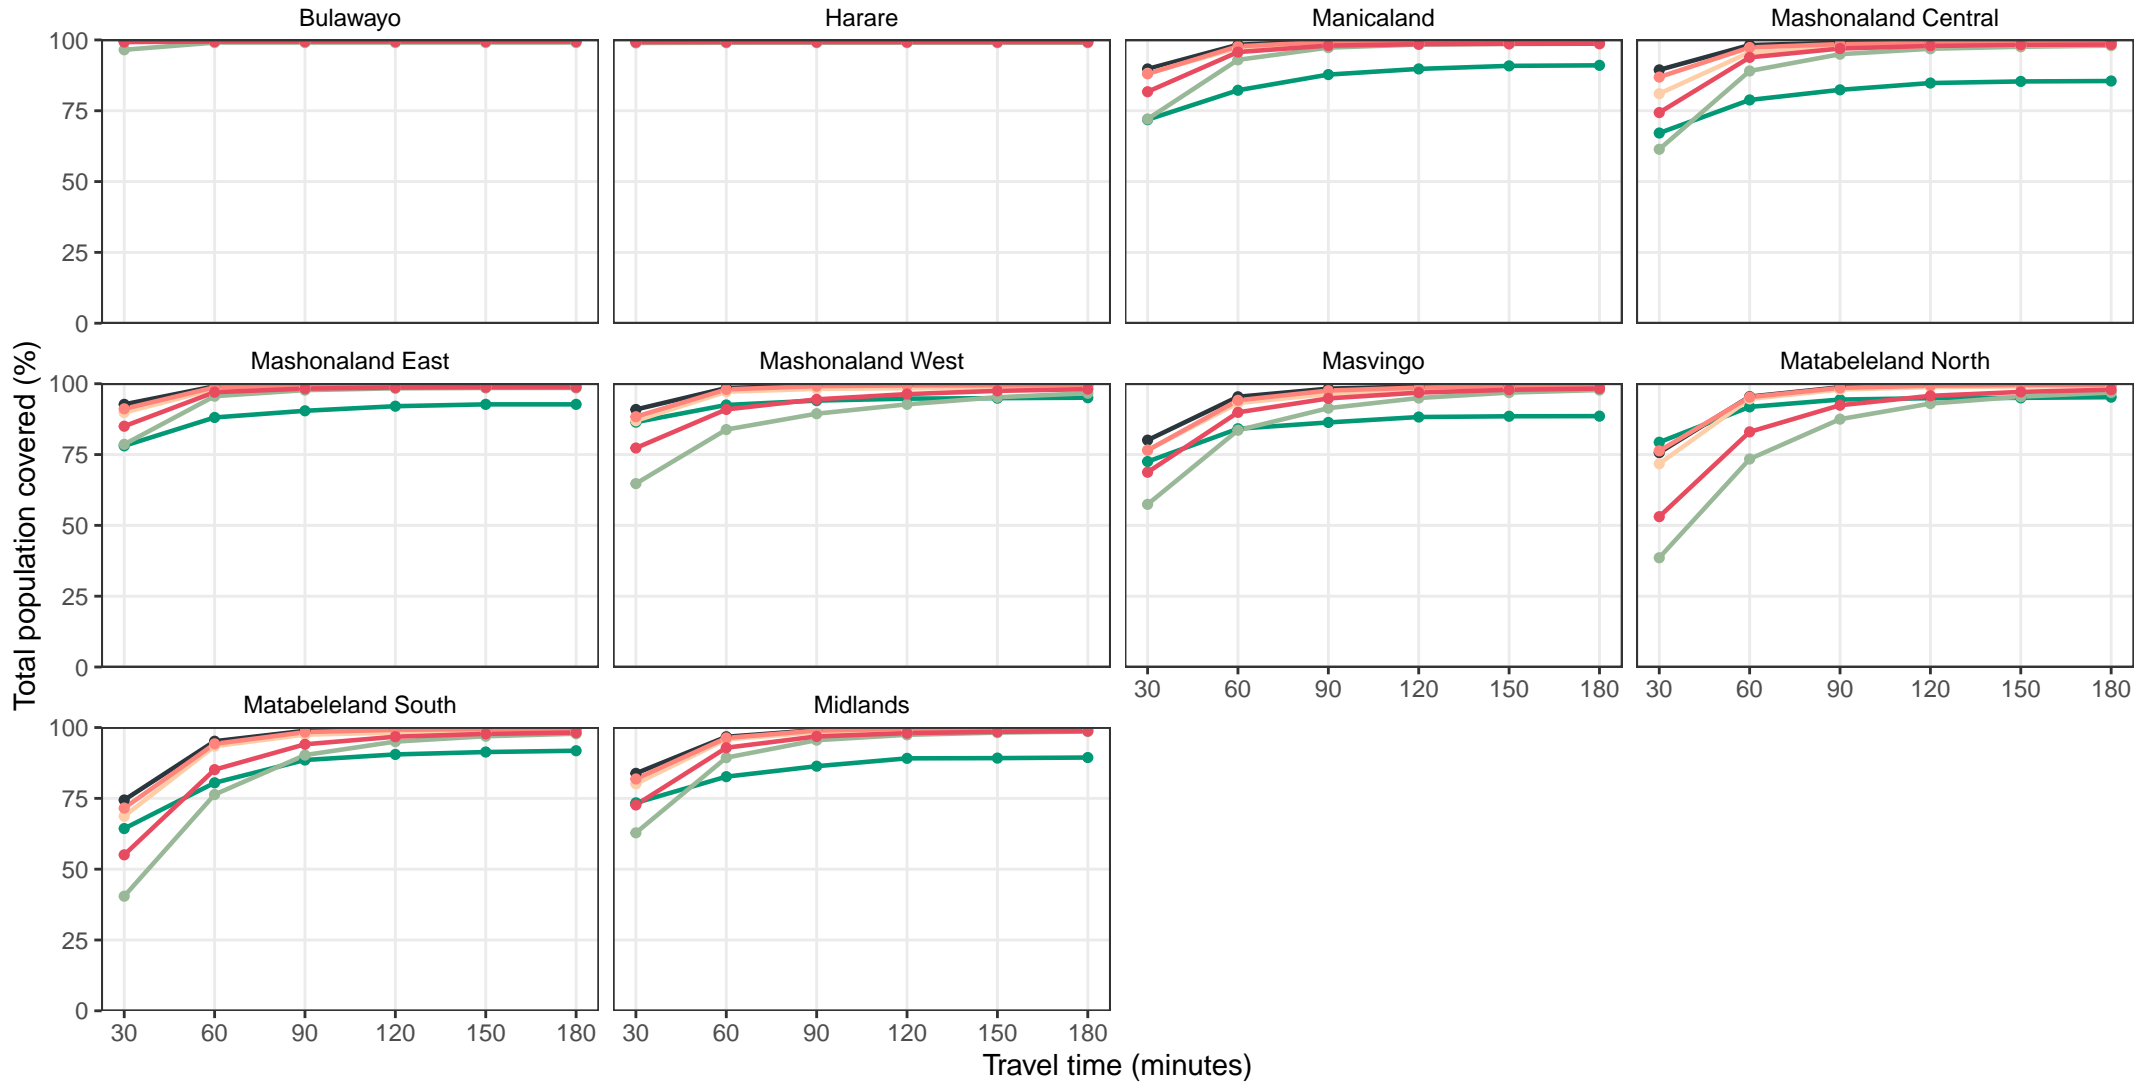

Supplementary Figure 51 – Accessibility coverage at 30, 60, 90, 120, and 150 minutes travel time at administrative level 1 for Zimbabwe.

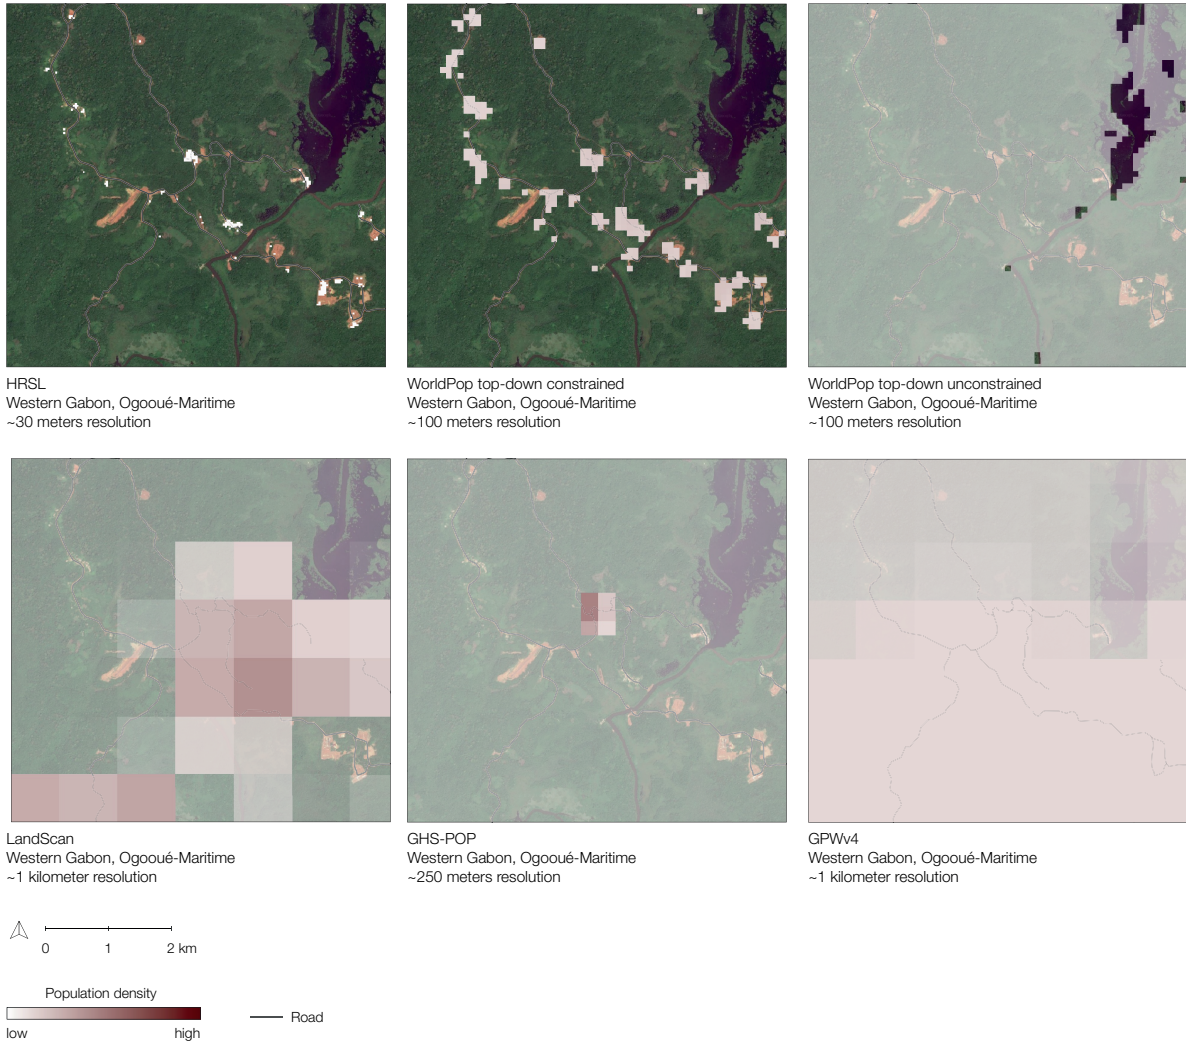

**Supplementary Figure 52** – Visual differences between a) HRSL, b) WorldPop top-down constrained, c) WorldPop top-down unconstrained, d) LandScan, e) GHS-POP, and f) GPWv4 for Western Gabon, Ogooué-Maritime. Google satellite imagery as background (Map data© 2015 Google). White transparent color represents low numbers of population density.



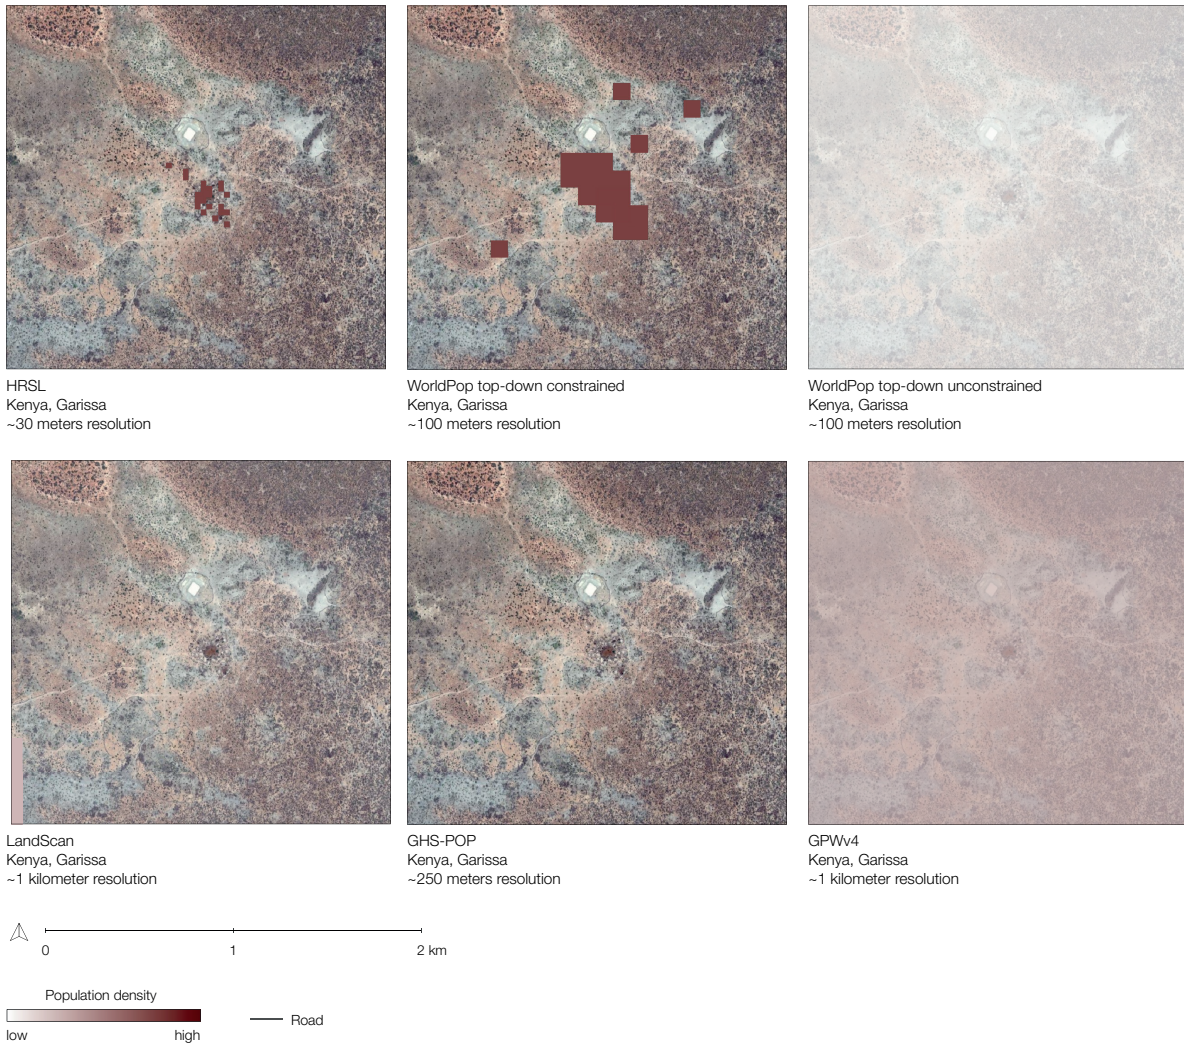

**Supplementary Figure 53** – Visual differences between a) HRSL, b) WorldPop top-down constrained, c) WorldPop top-down unconstrained, d) LandScan, e) GHS-POP, and f) GPWv4 for Garissa, Kenya. Google satellite imagery as background (Map data© 2015 Google). White transparent color represents low numbers of population density.

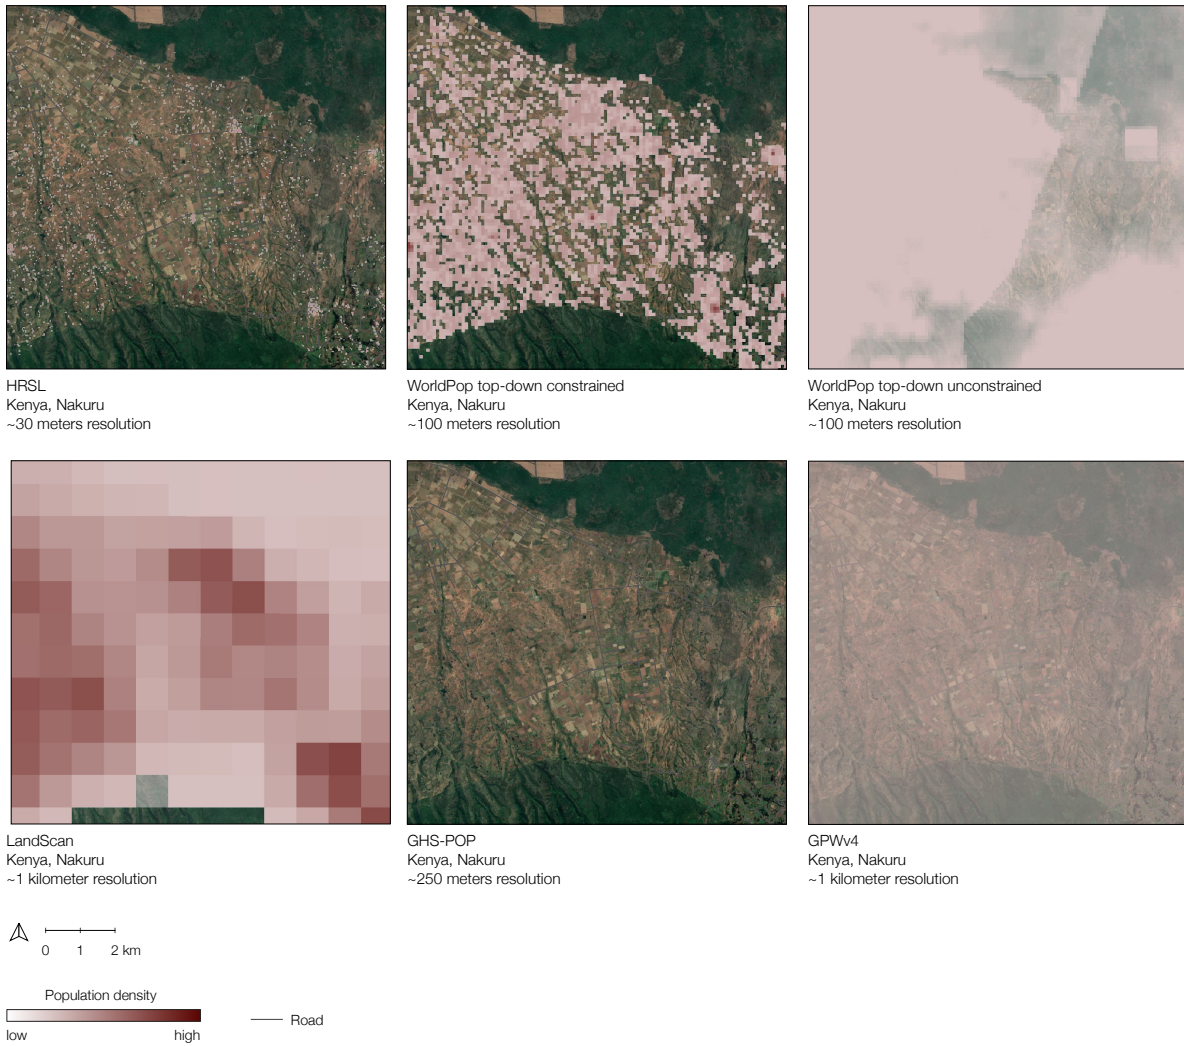

**Supplementary Figure 54** – Visual differences between a) HRSL, b) WorldPop top-down constrained, c) WorldPop top-down unconstrained, d) LandScan, e) GHS-POP, and f) GPWv4 for Nakuru, Kenya. Google satellite imagery as background (Map data© 2015 Google). White transparent color represents low numbers of population density.

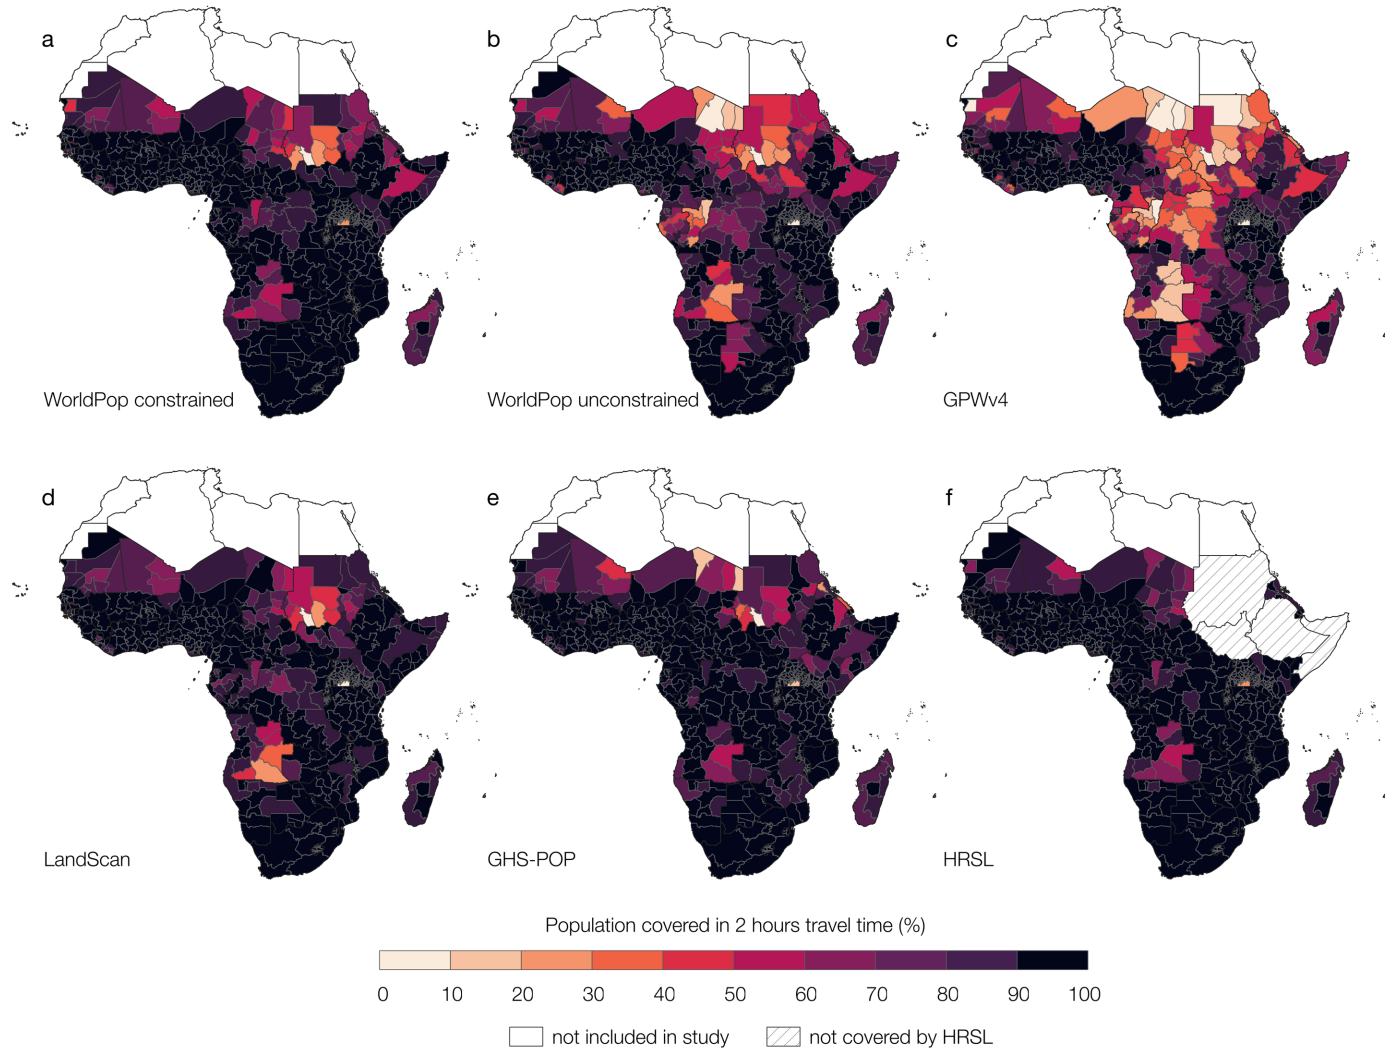

**Supplementary Figure 55** – Zonal statistics of accessibility coverage at 2-hours travel time at administrative level 1 for sub-Saharan Africa. All 6 datasets can be compared.
